# Supplementary material for: Efficient Synthesis of Boron-Containing α-Acyloxyamide Analogs via Microwave Irradiation
Source: MDPI journal article supplement (doi:10.3390/molecules18089488), 2013-08-08

## Supplementary Materials

**Figure S1.** HRMS (ESI, positive ion)  $[M+H]^+$  of Compound (**A1**).

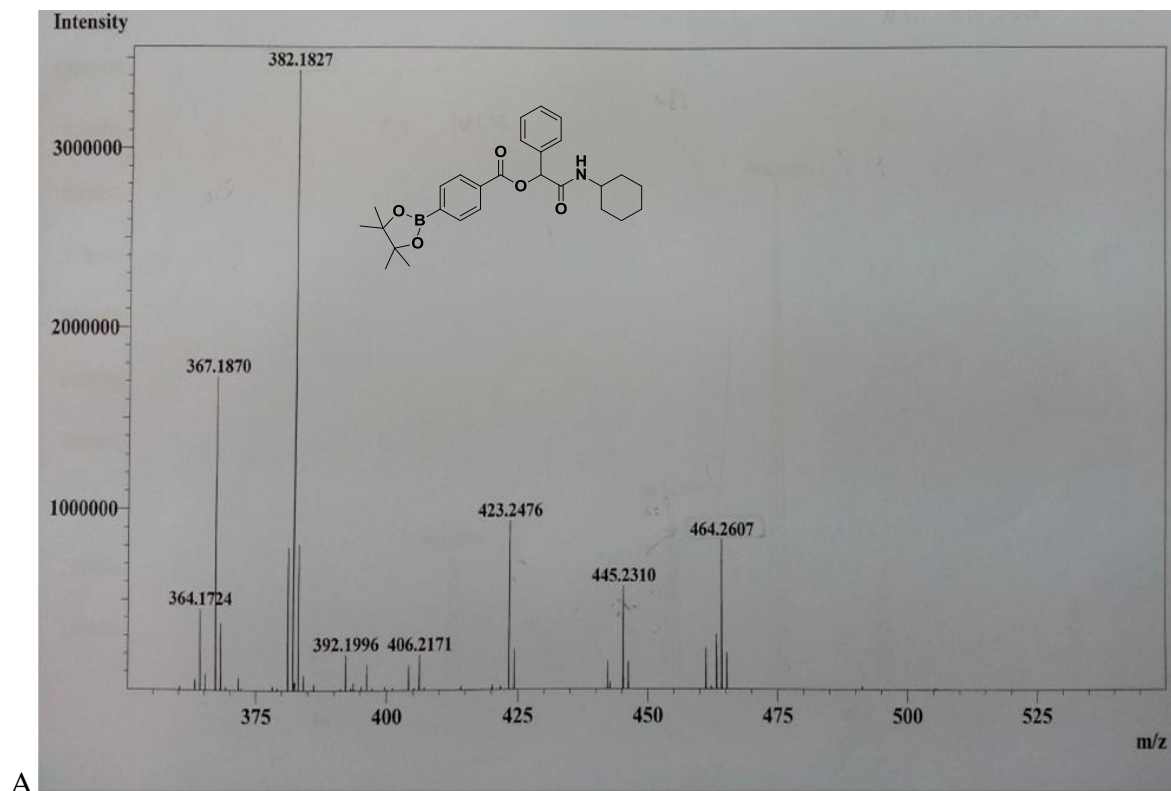

**Figure S2.** 600 MHz  $^1\text{H}$ -NMR of Compound (**A1**) in Chloroform- $d$ .

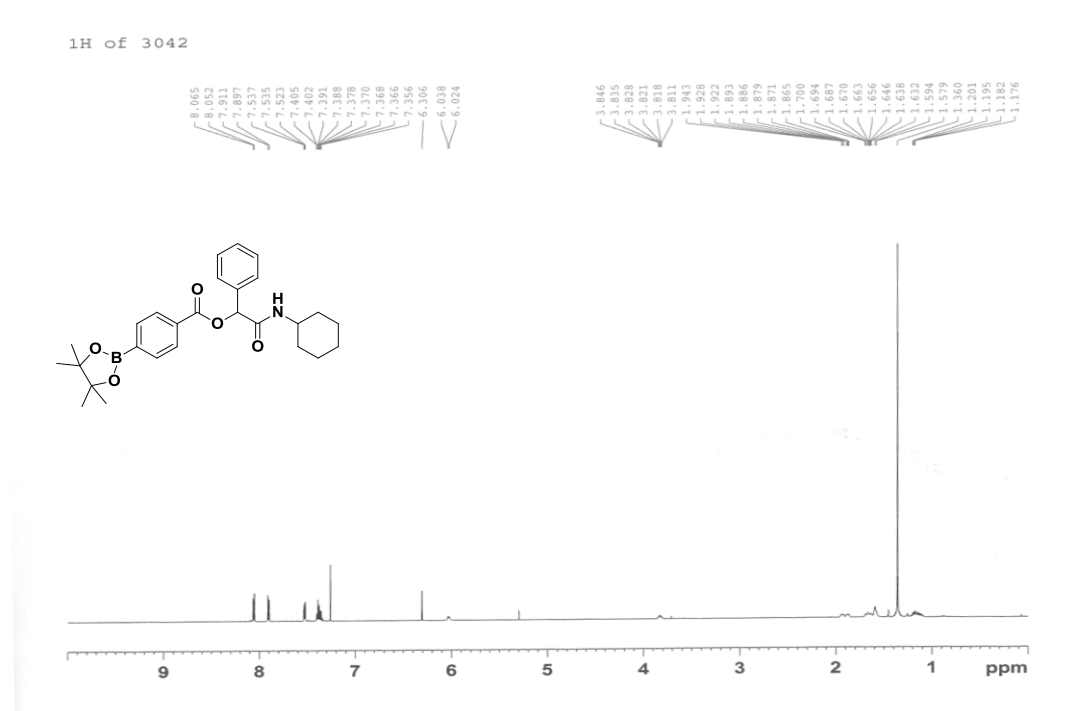

**Figure S3.** 600 MHz  $^{13}\text{C}$ -NMR of Compound (A1) in Chloroform-*d*.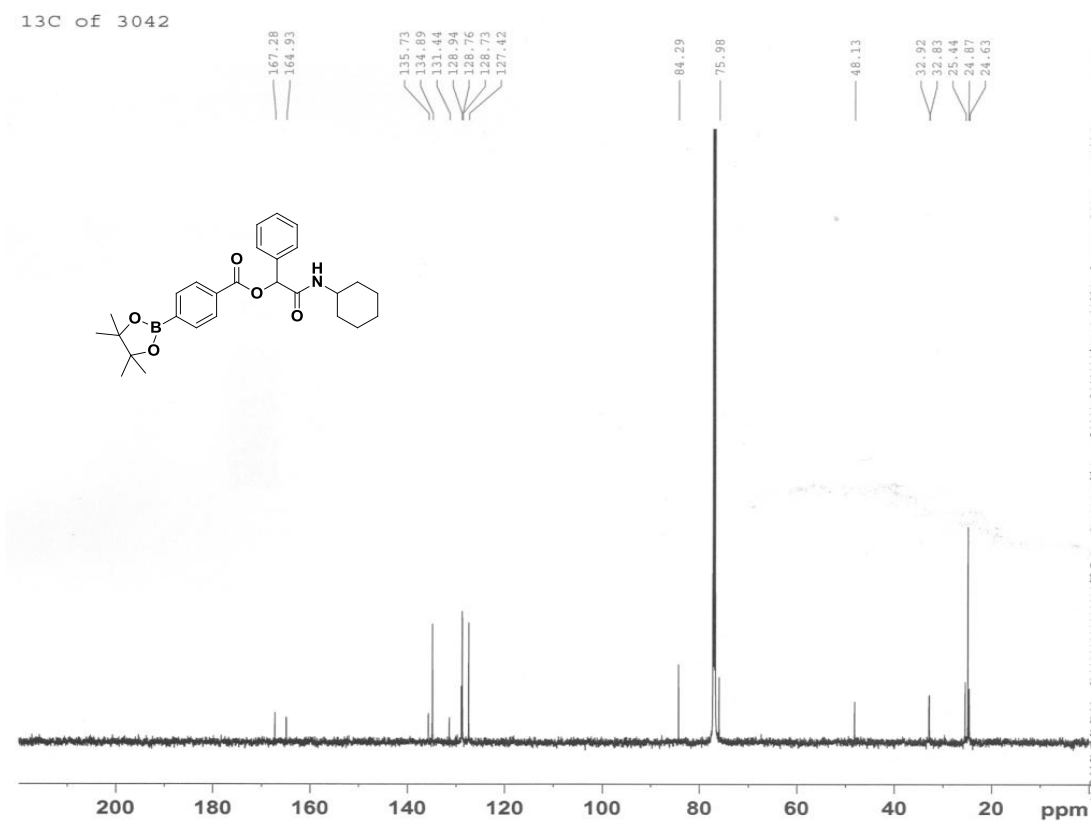**Figure S4.** 600 MHz  $^{11}\text{B}$ -NMR of Compound (A1) in Chloroform-*d*.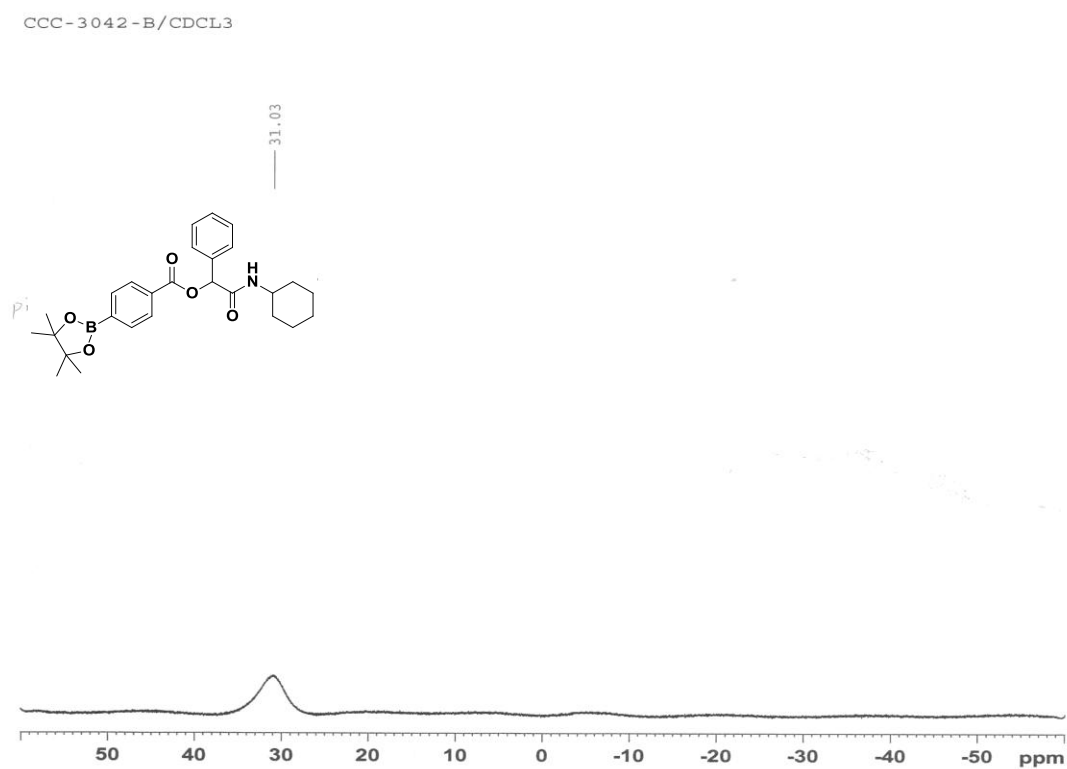

**Figure S5.** HRMS (ESI, positive ion)  $[M+H]^+$  of Compound (A2).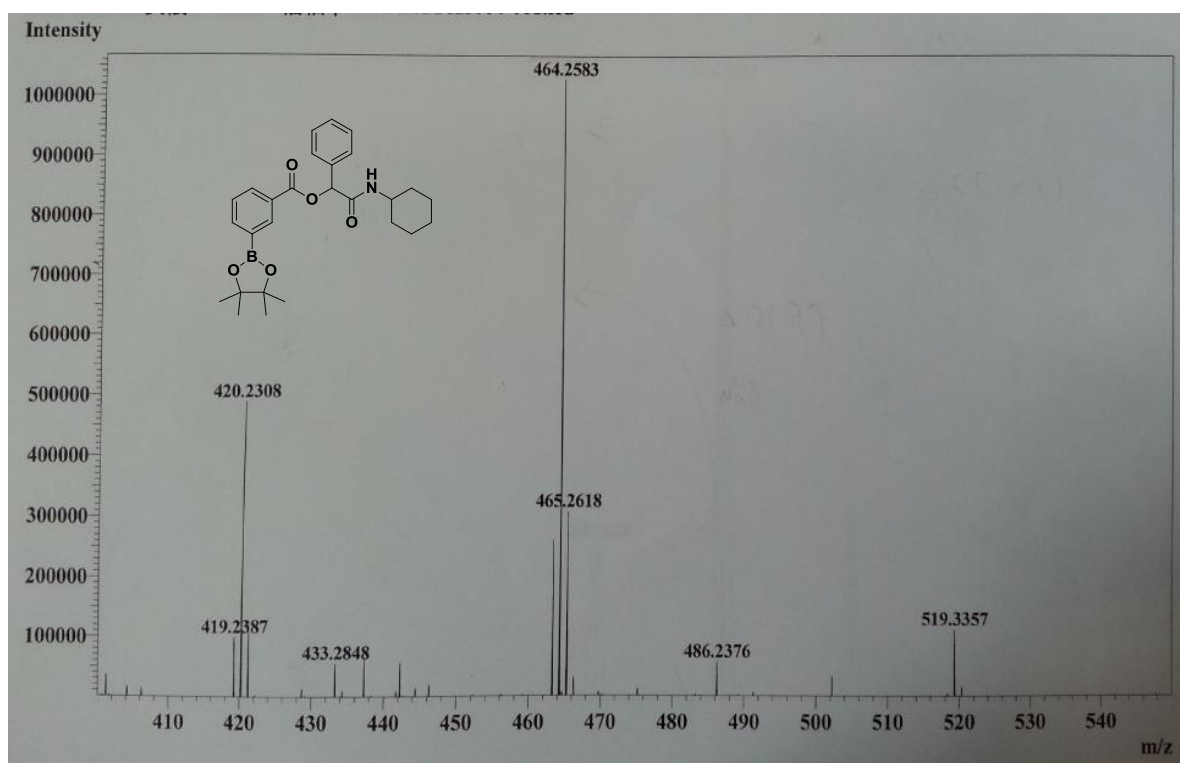**Figure S6.** 600 MHz  $^{13}\text{C}$ -NMR of Compound (A2) in Chloroform-*d*.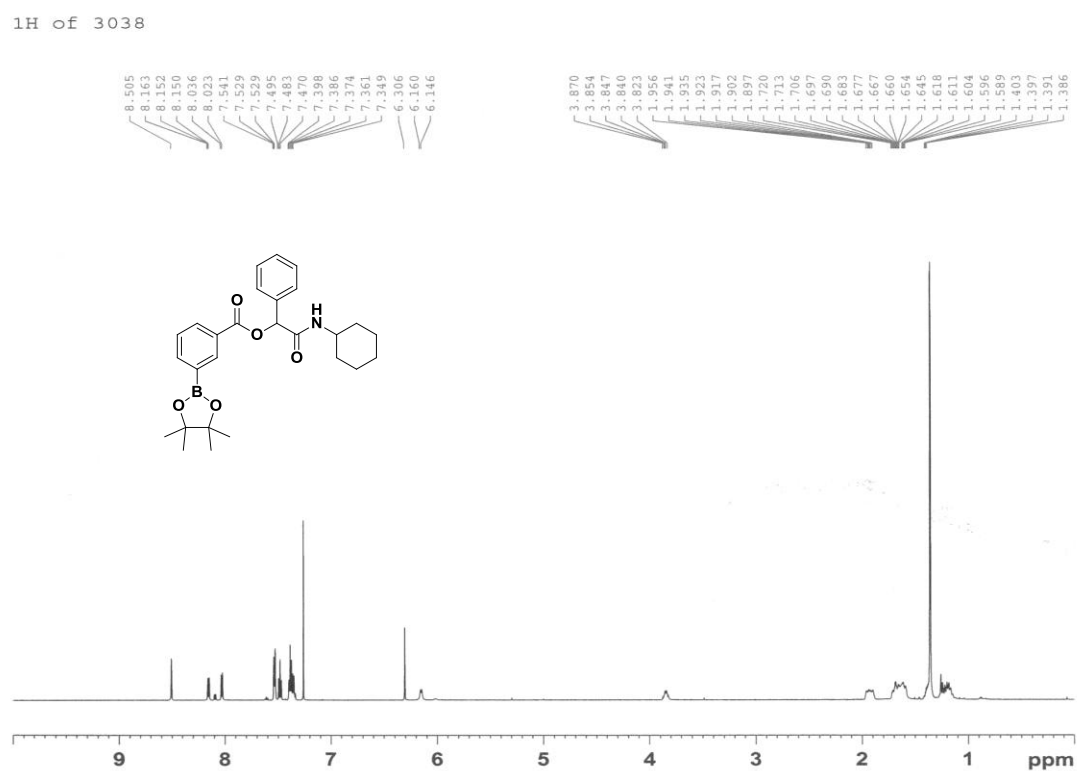

**Figure S7.** 600 MHz  $^{13}\text{C}$ -NMR of Compound (A2) in Chloroform-*d*.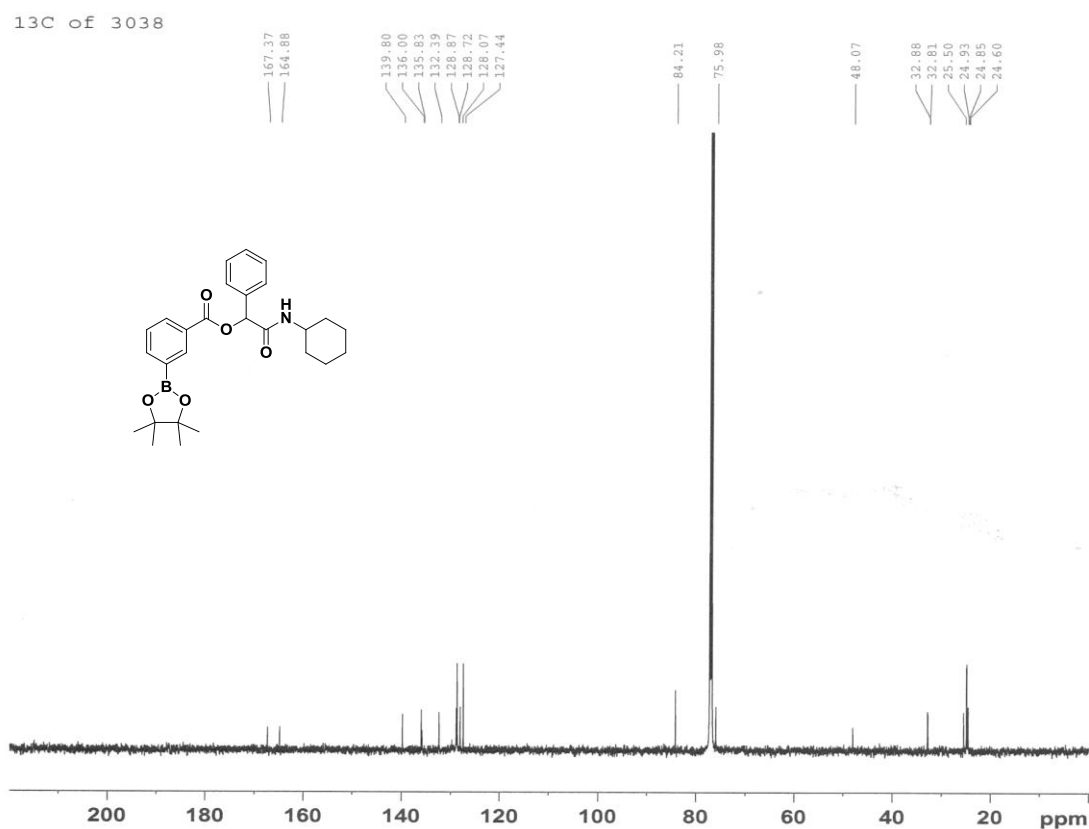**Figure S8.** 600 MHz  $^{11}\text{B}$ -NMR of Compound (A2) in Chloroform-*d*.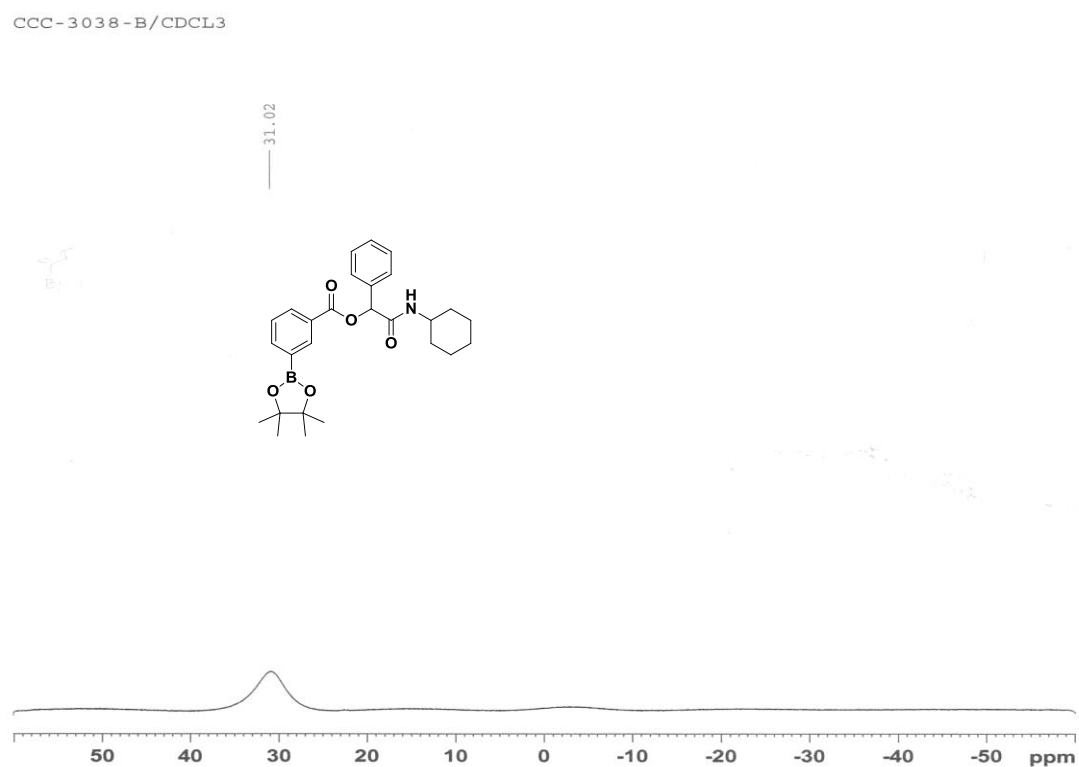

**Figure S9.** HRMS (ESI, positive ion)  $[M+H]^+$  of Compound (A3).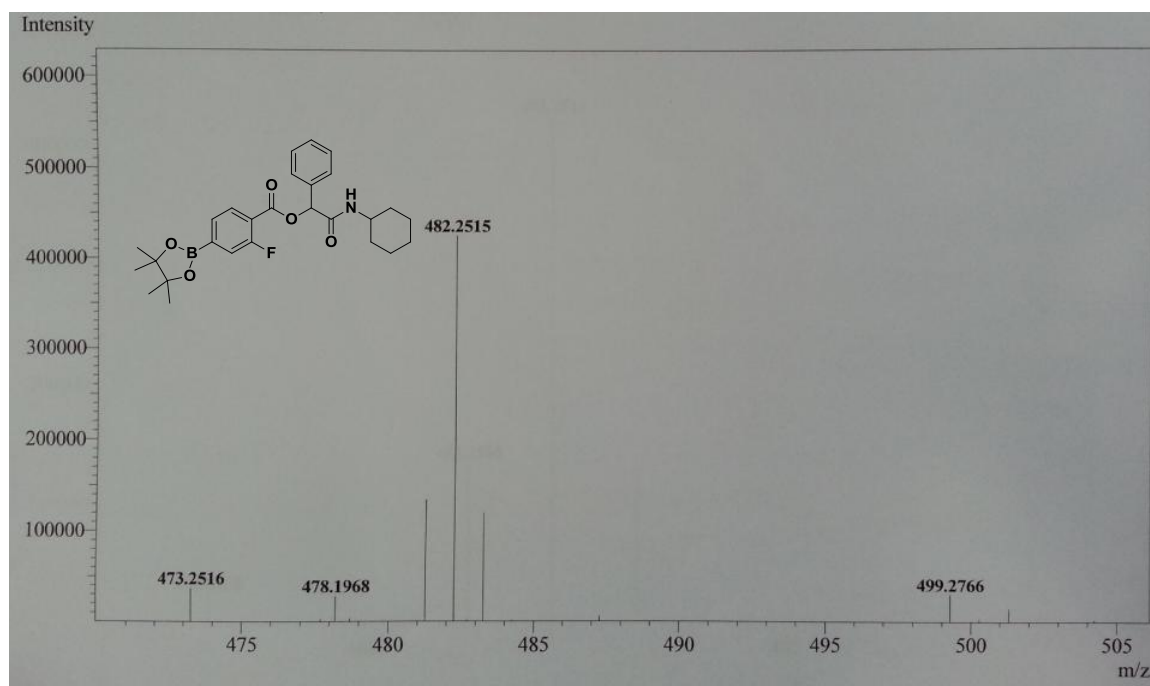**Figure S10.** 600 MHz  $^1\text{H}$ -NMR of Compound (A3) in Chloroform- $d$ .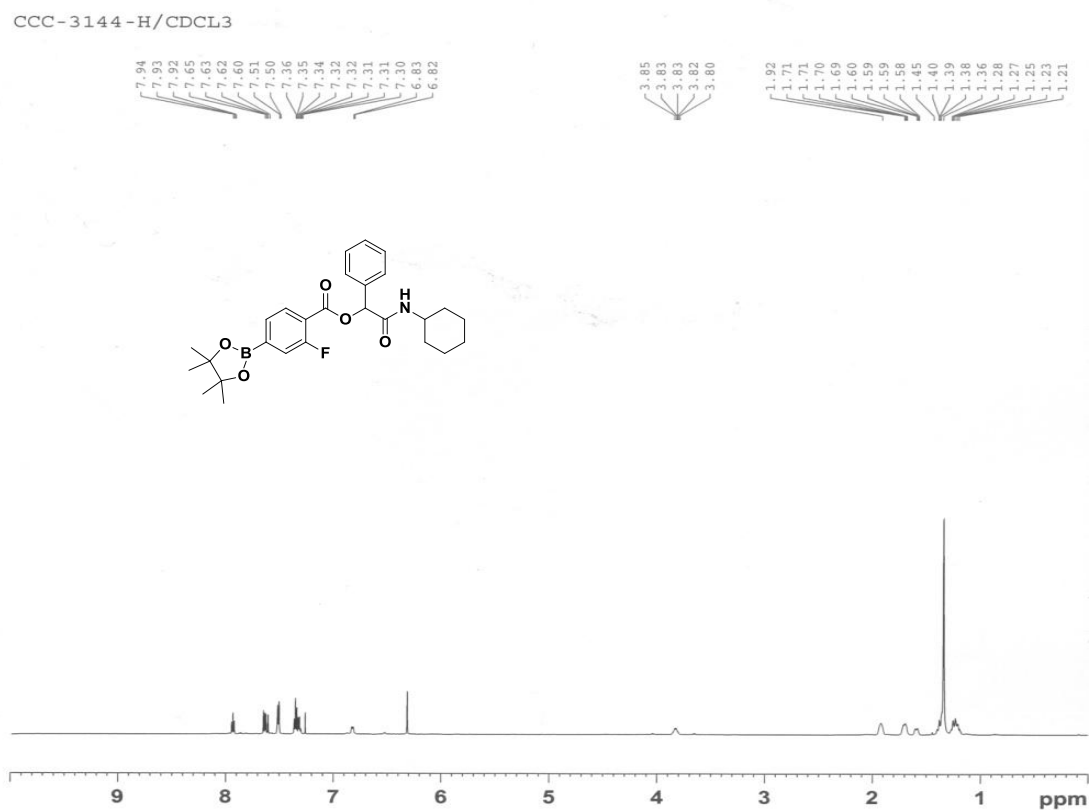

**Figure S11.** 600 MHz  $^{13}\text{C}$ -NMR of Compound (A3) in Chloroform-*d*.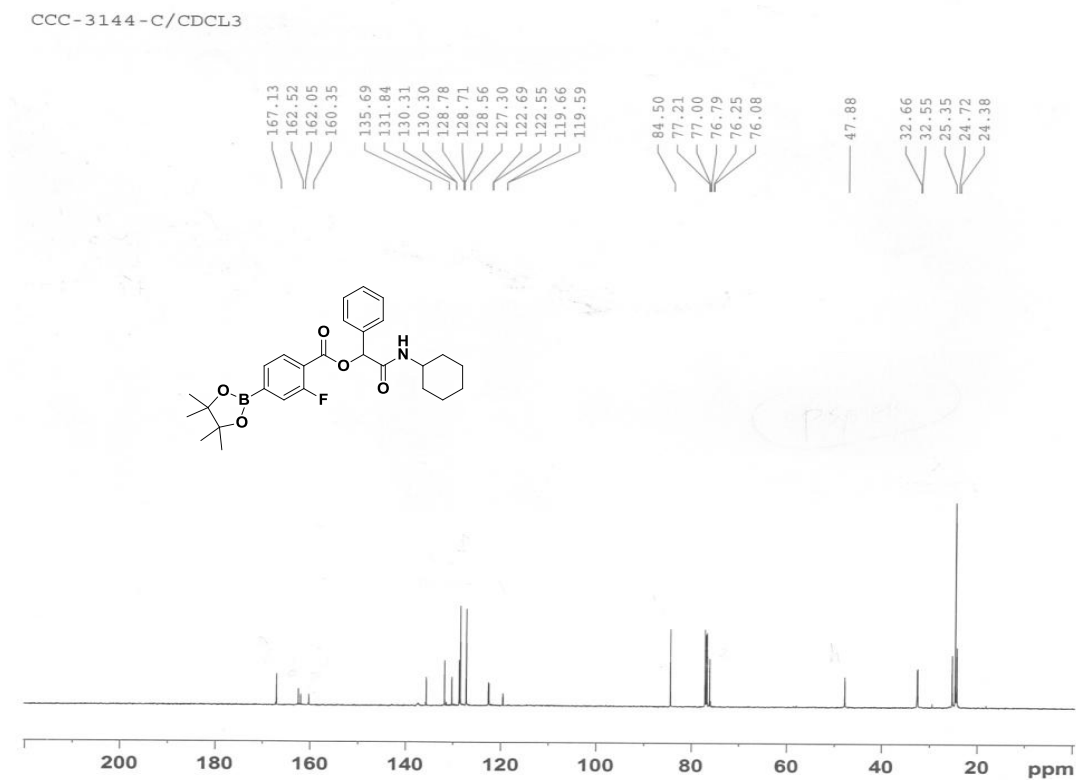**Figure S12.** 600 MHz  $^{11}\text{B}$ -NMR of Compound (A3) in Chloroform-*d*.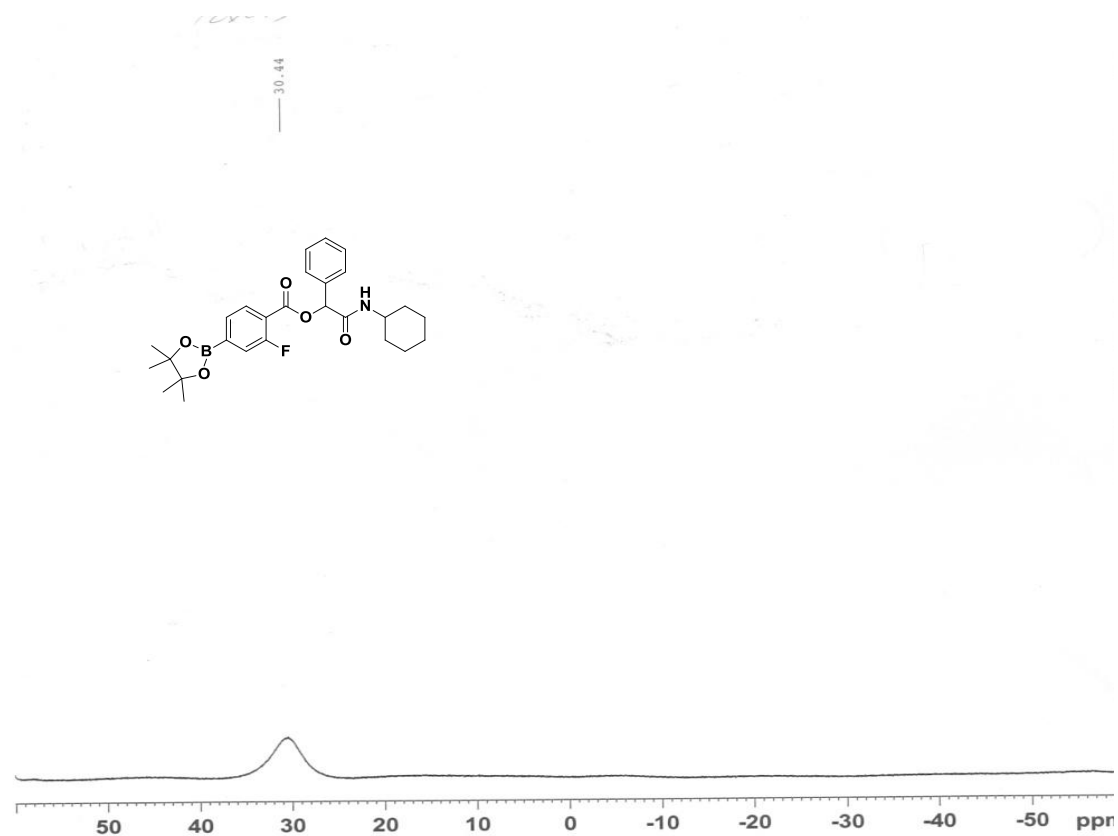

**Figure S13.** HRMS (ESI, positive ion)  $[M+H]^+$  of Compound (**A4**).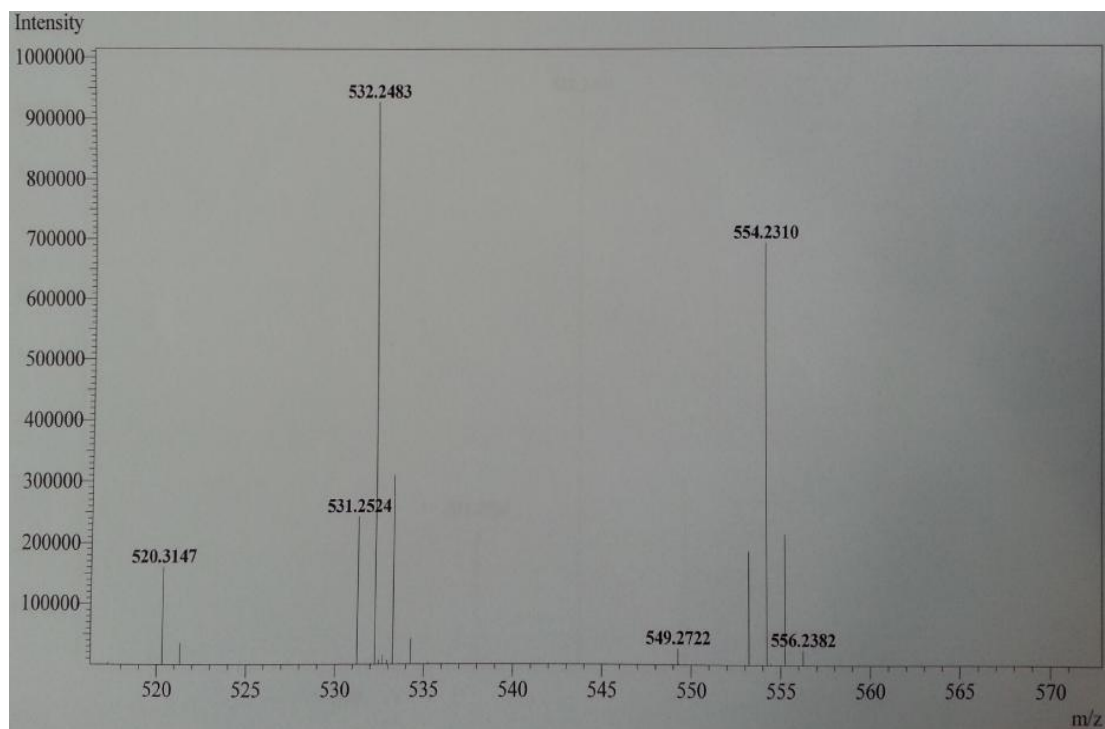**Figure S14.** 600 MHz  $^1\text{H}$ -NMR of Compound (**A4**) in Chloroform- $d$ .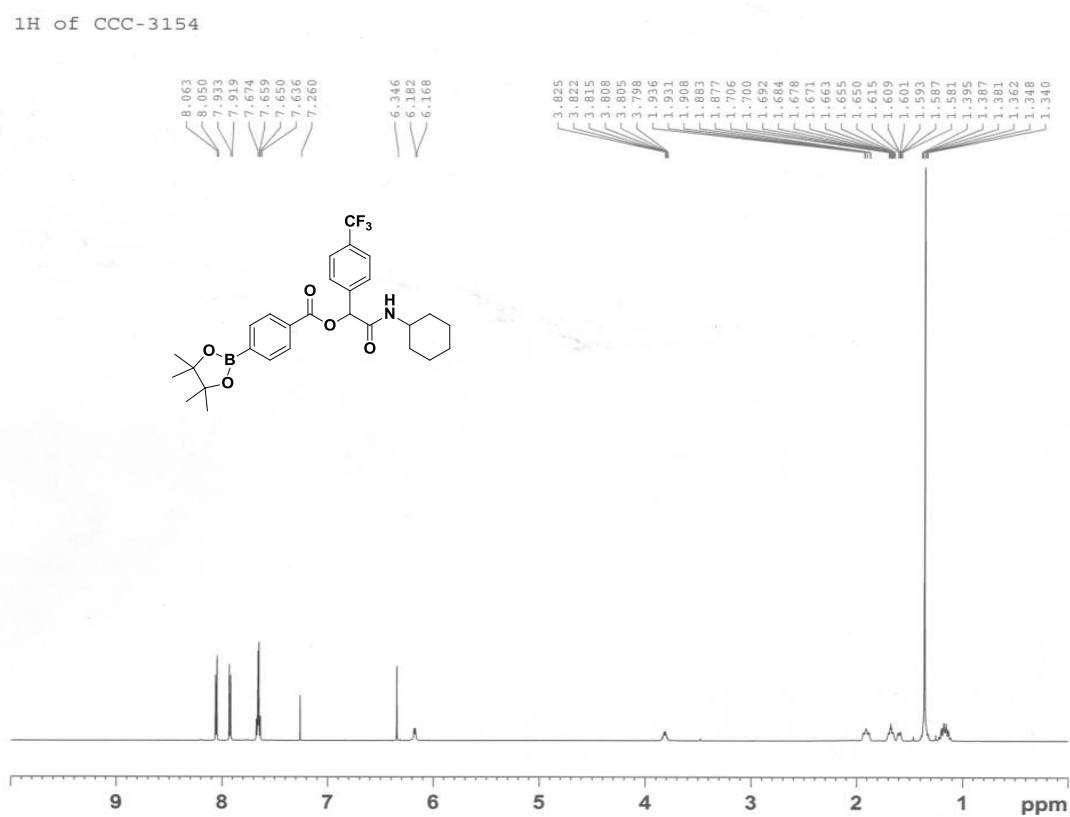

**Figure S15.** 600 MHz  $^{13}\text{C}$ -NMR of Compound (A4) in Chloroform-*d*.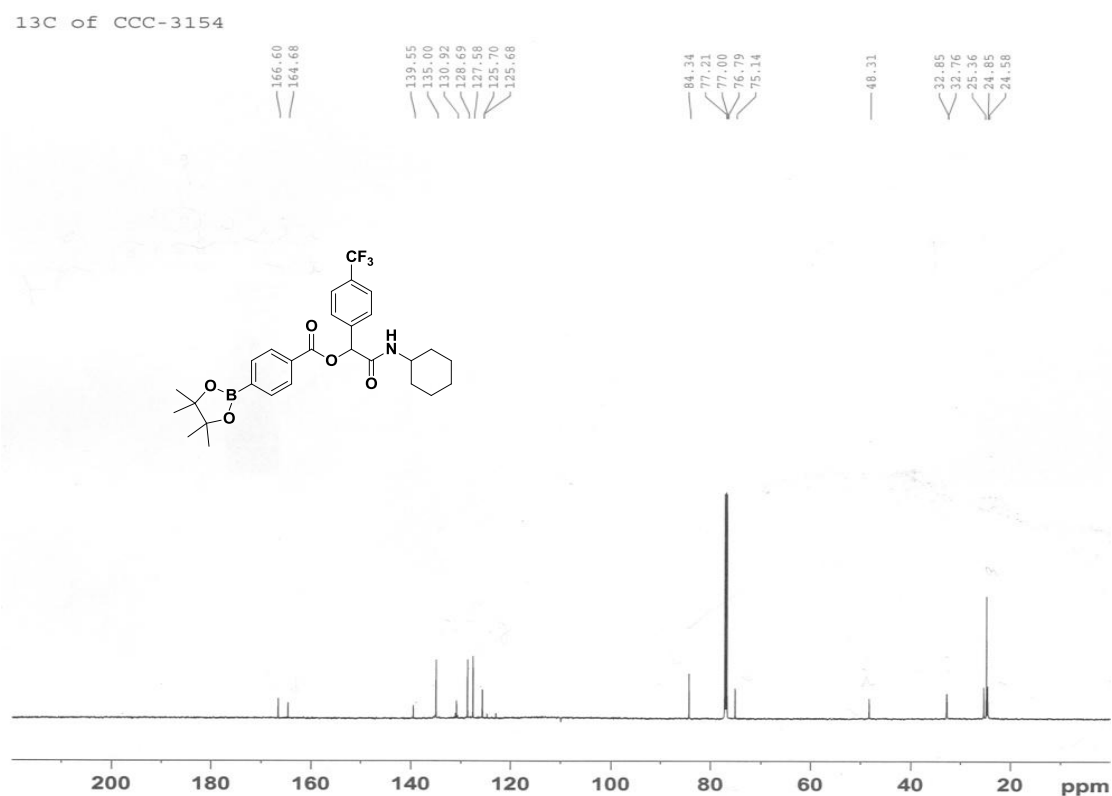**Figure S16.** 600 MHz  $^{11}\text{B}$ -NMR of Compound (A4) in Chloroform-*d*.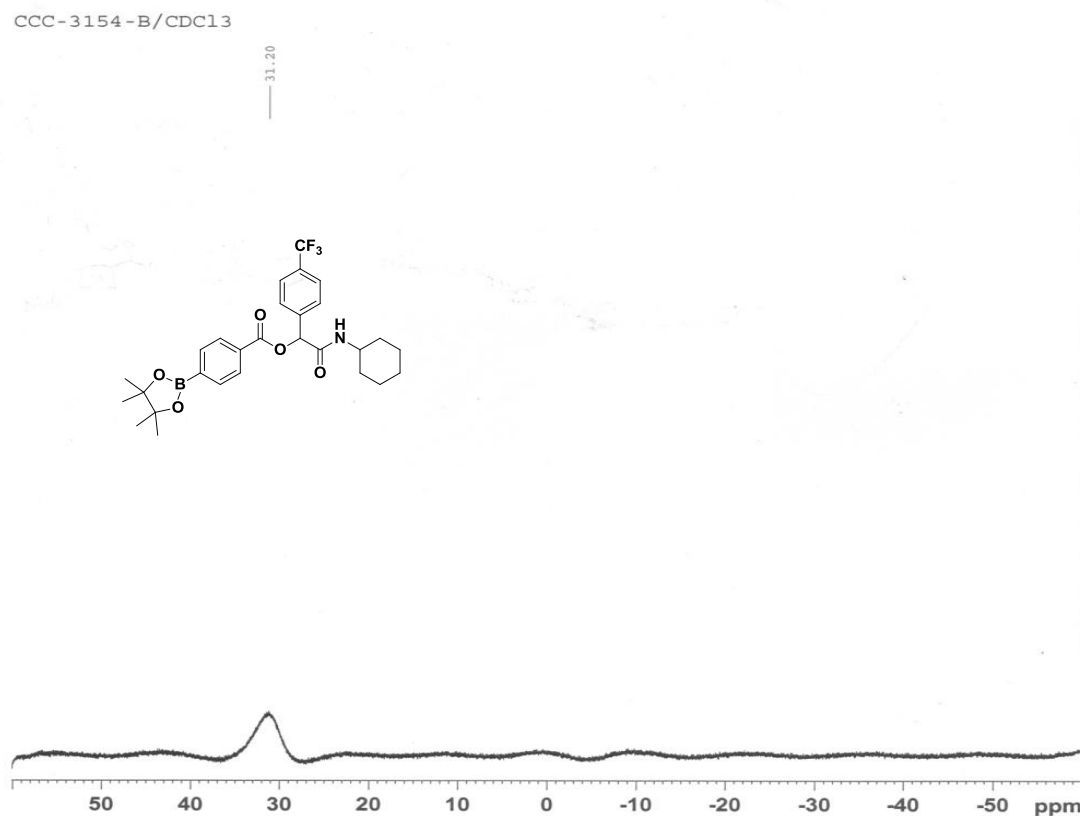



**Figure S17.** HRMS (ESI, positive ion)  $[M+H]^+$  of Compound (A5).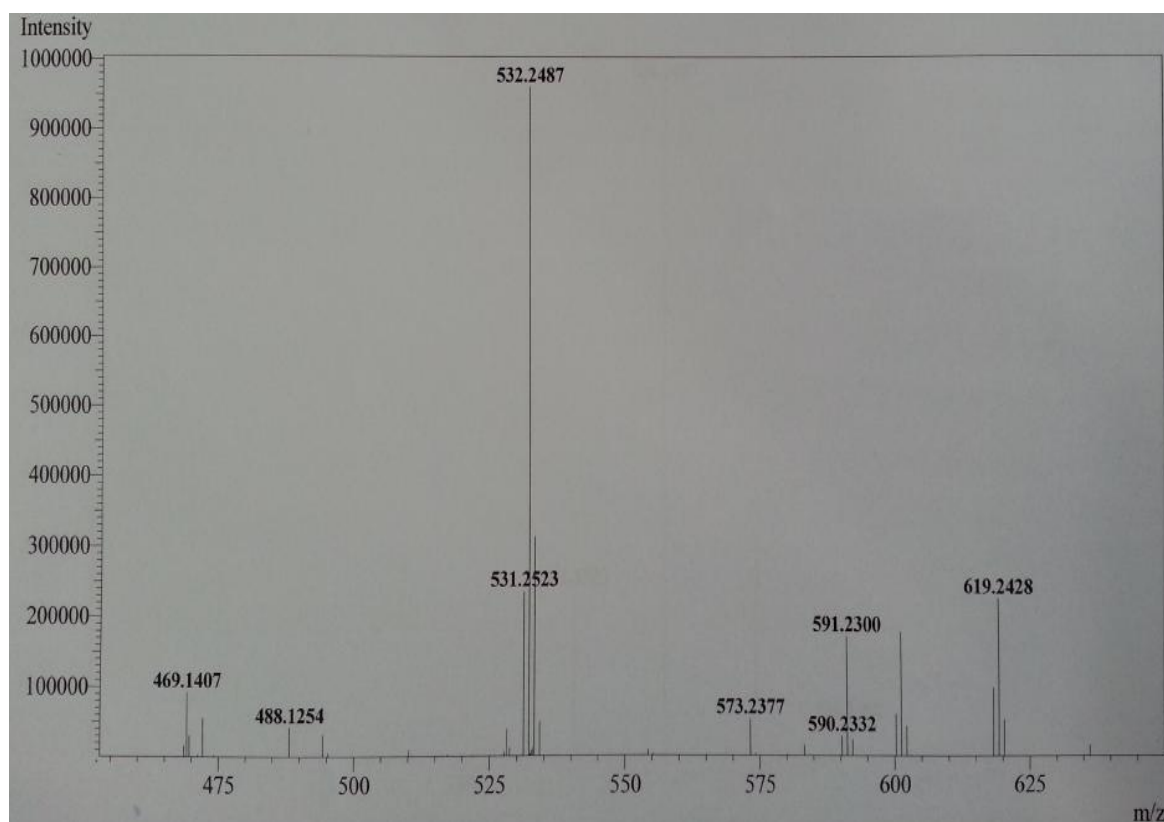**Figure S18.** 600 MHz  $^1\text{H}$ -NMR of Compound (A5) in Chloroform- $d$ .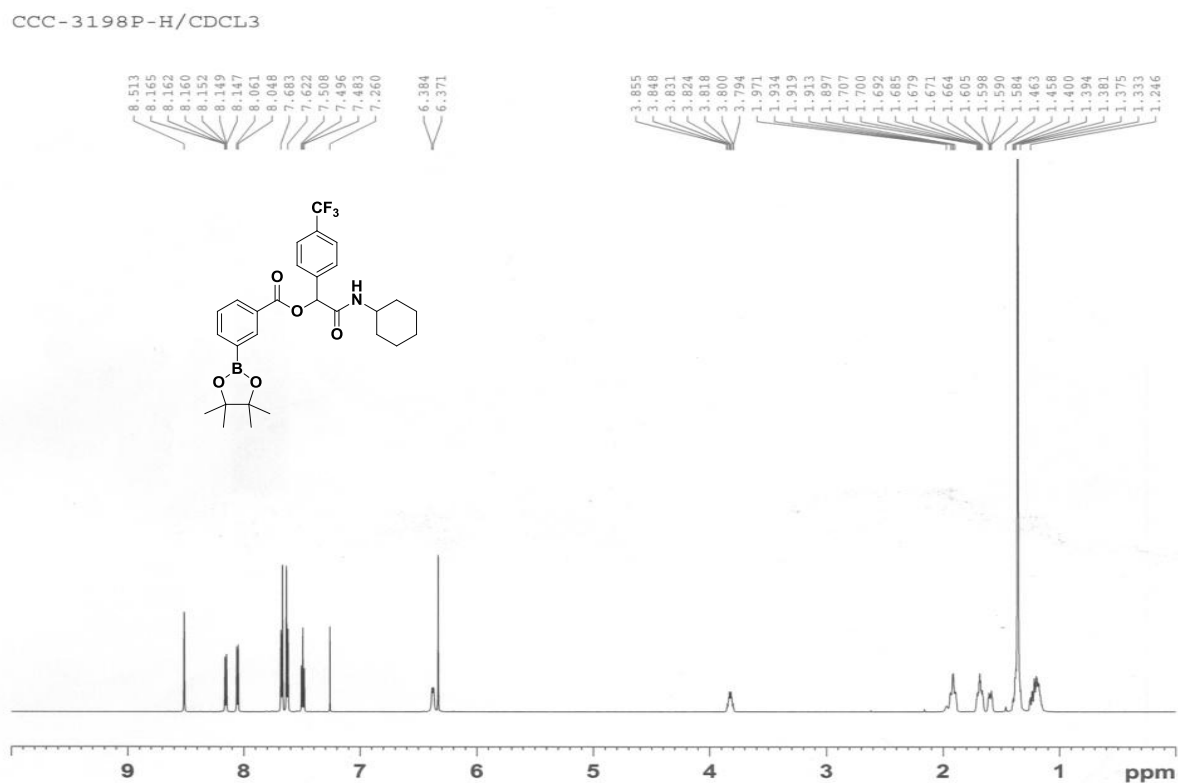

**Figure S19.** 600 MHz  $^{13}\text{C}$ -NMR of Compound (A5) in Chloroform-*d*.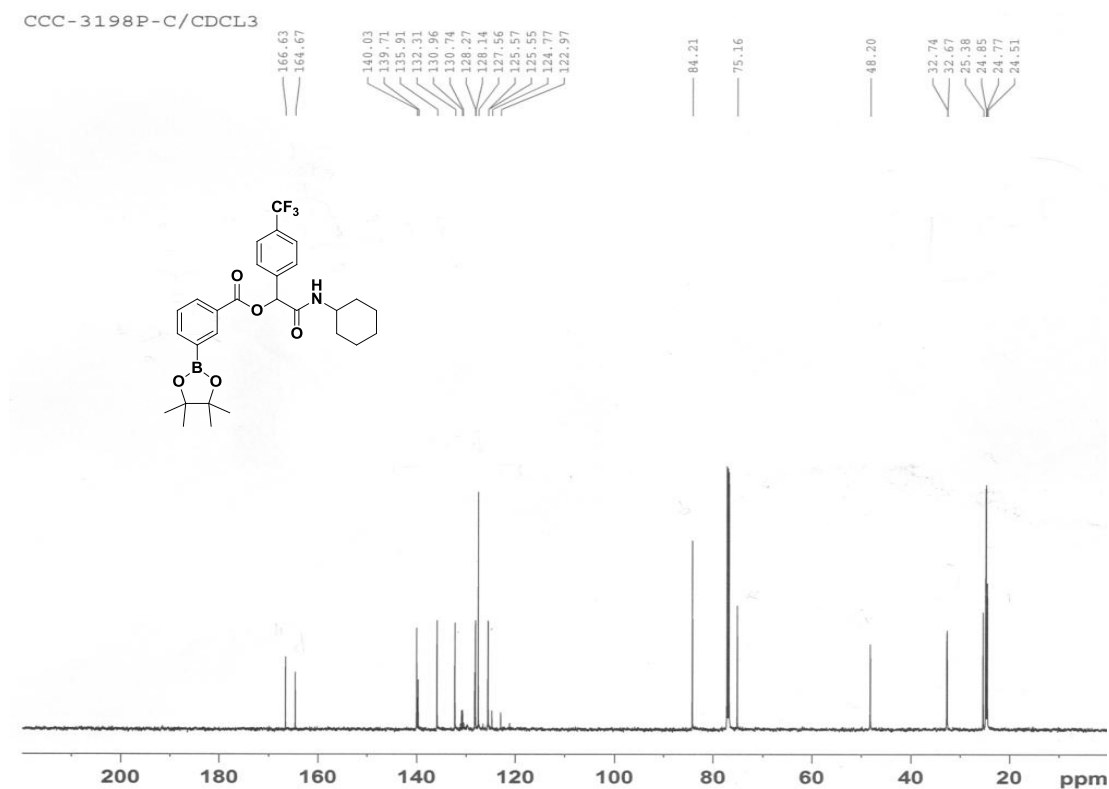**Figure S20.** 600 MHz  $^{11}\text{B}$ -NMR of Compound (A5) in Chloroform-*d*.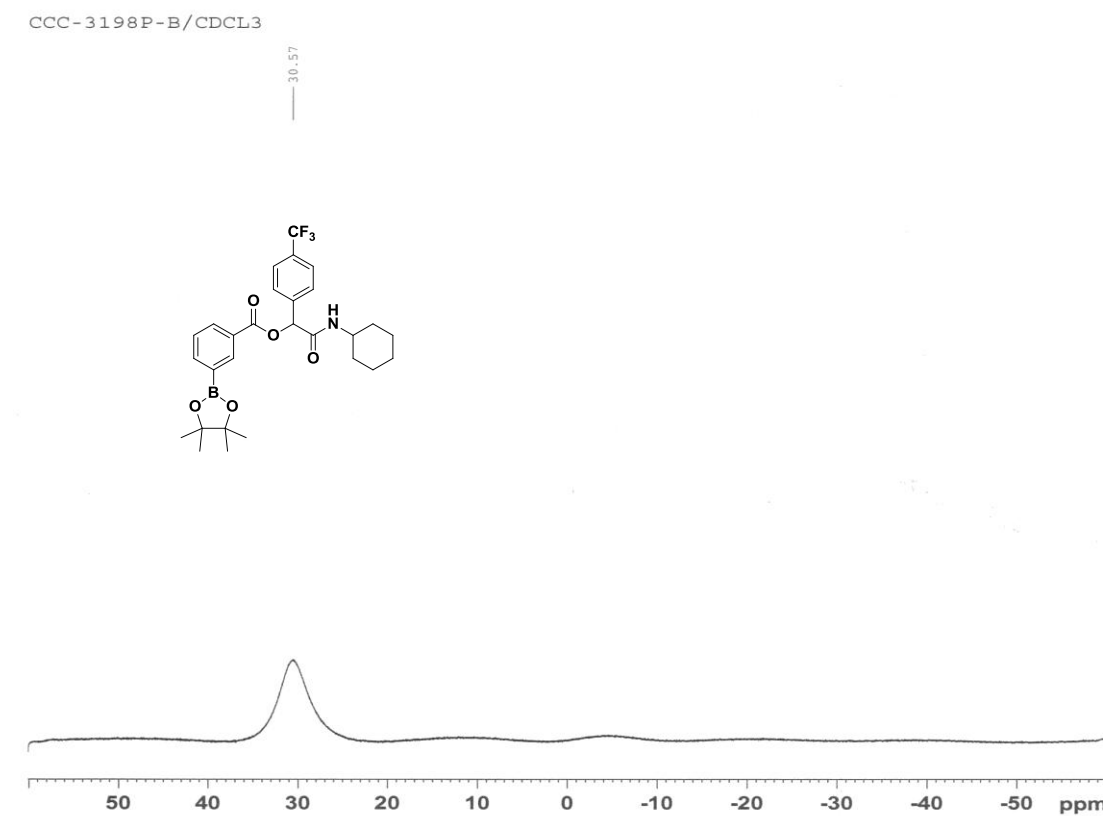

**Figure S21.** HRMS (ESI, positive ion)  $[M+H]^+$  of Compound (A6).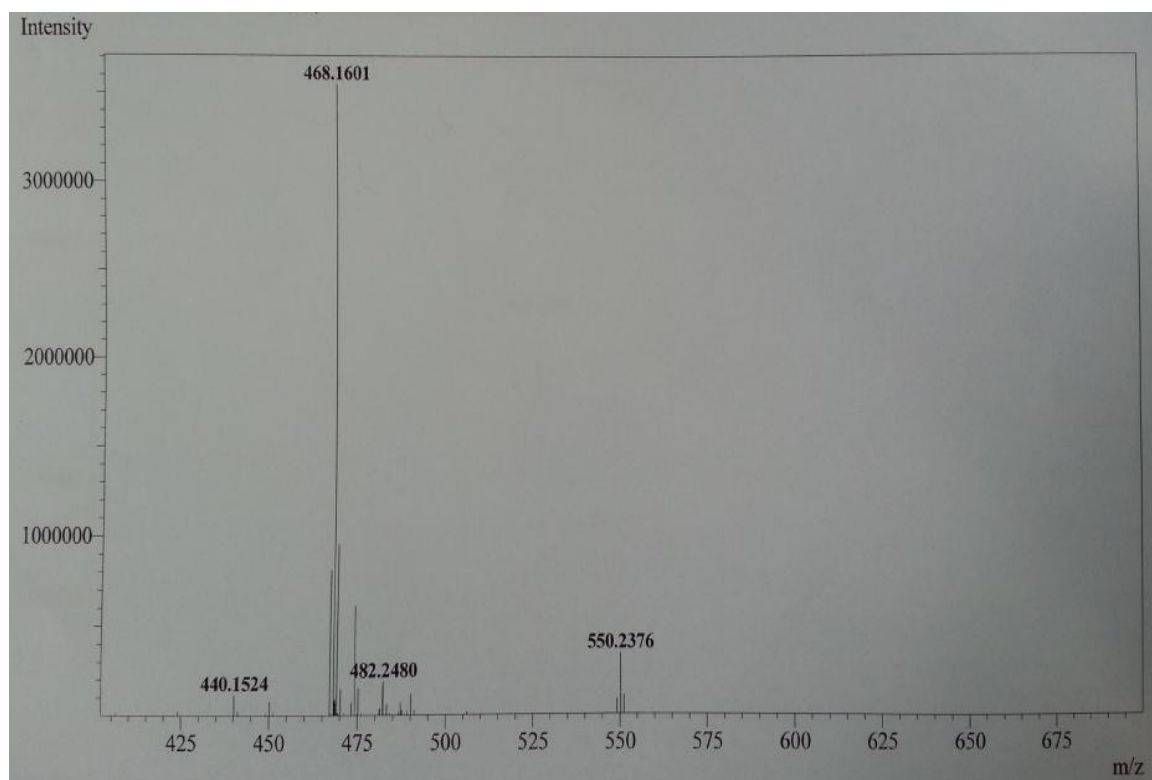**Figure S22.** 600 MHz  $^1\text{H}$ -NMR of Compound (A6) in Chloroform- $d$ .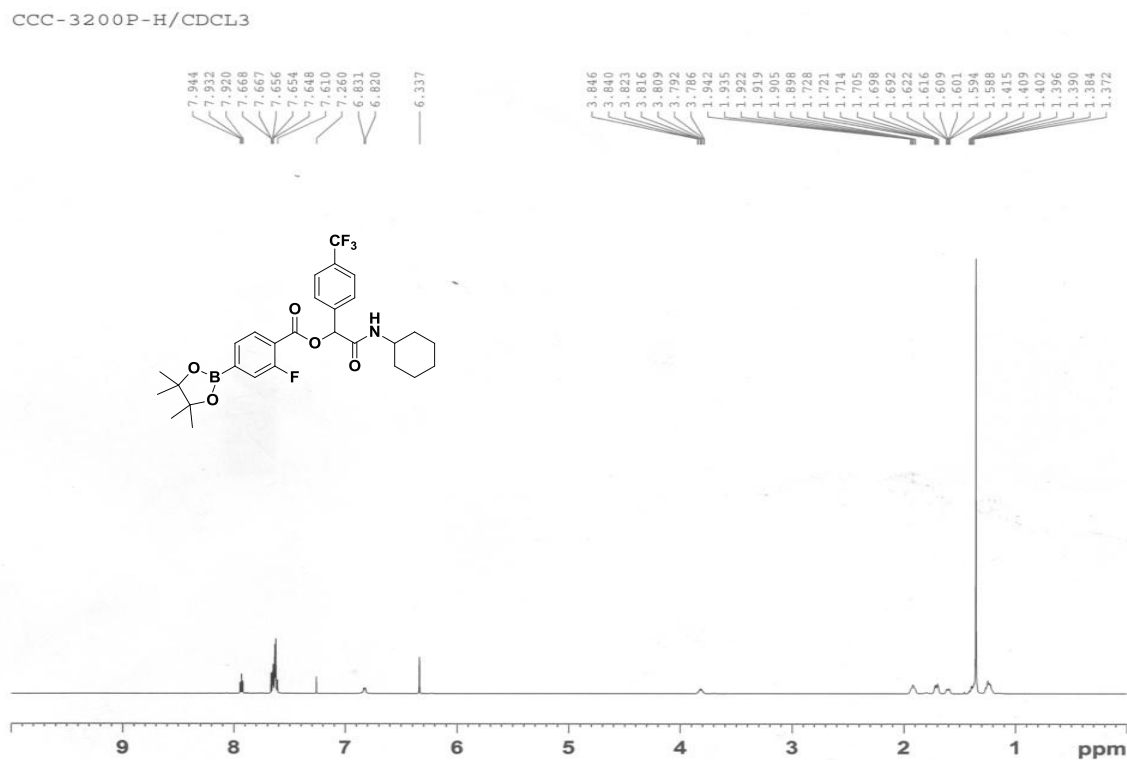

**Figure S23.** 600 MHz  $^{13}\text{C}$ -NMR of Compound (A6) in Chloroform-*d*.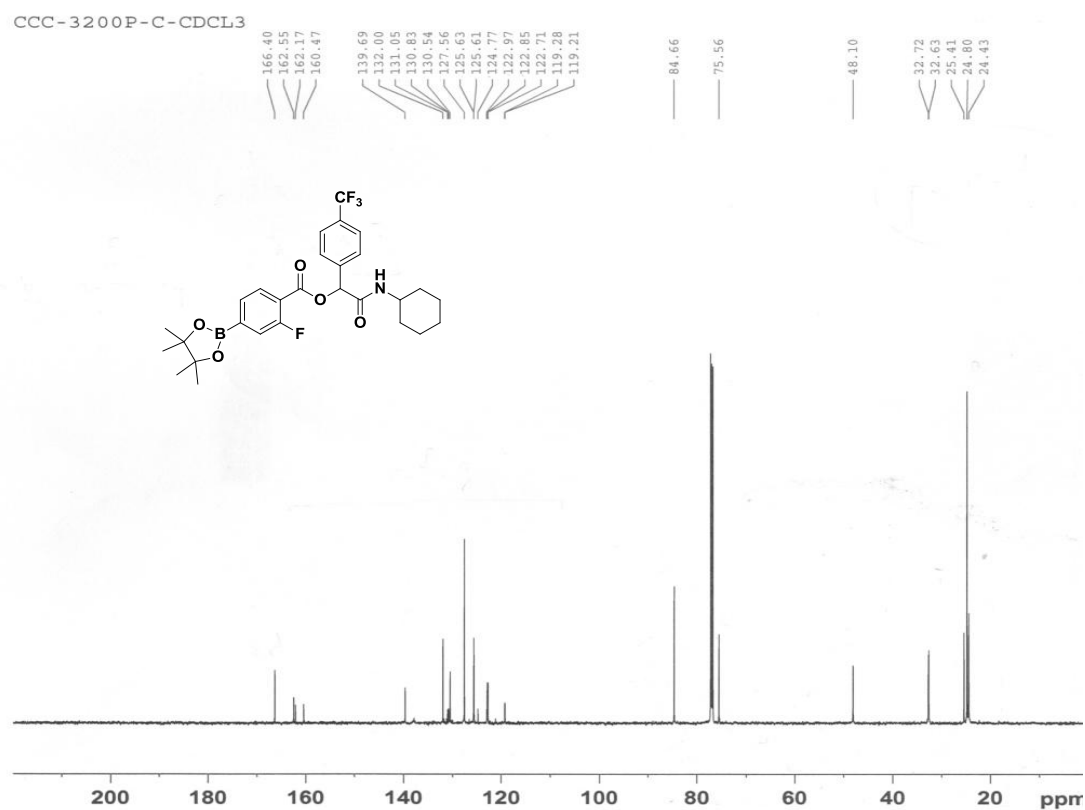**Figure S24.** 600 MHz  $^{11}\text{B}$ -NMR of Compound (A6) in Chloroform-*d*.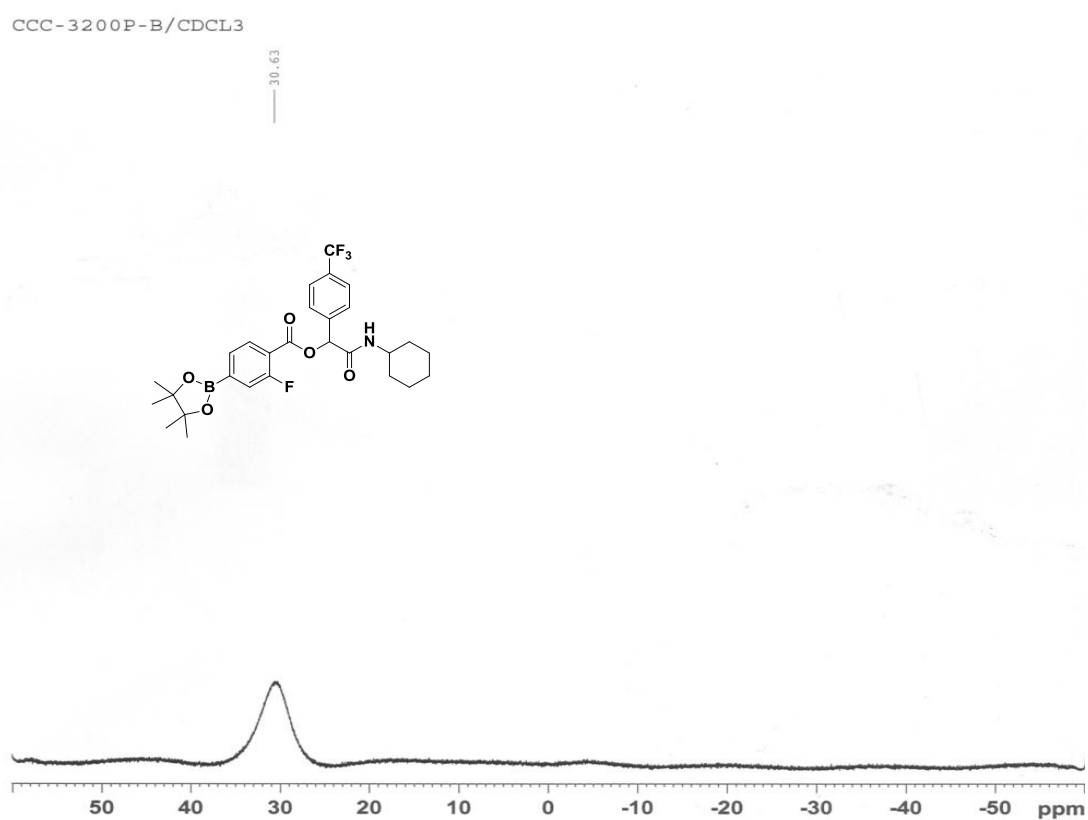

**Figure S25.** HRMS (ESI, positive ion)  $[M+H]^+$  of Compound (A7).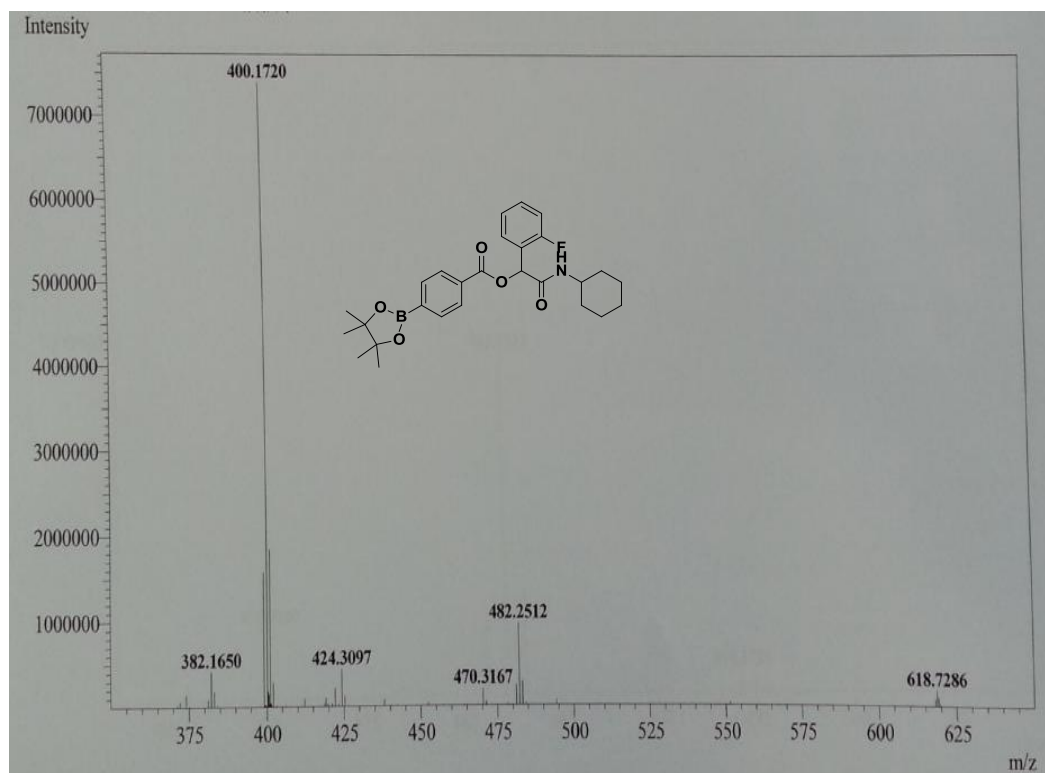**Figure S26.** 600 MHz  $^1\text{H}$ -NMR of Compound (A7) in Chloroform-*d*.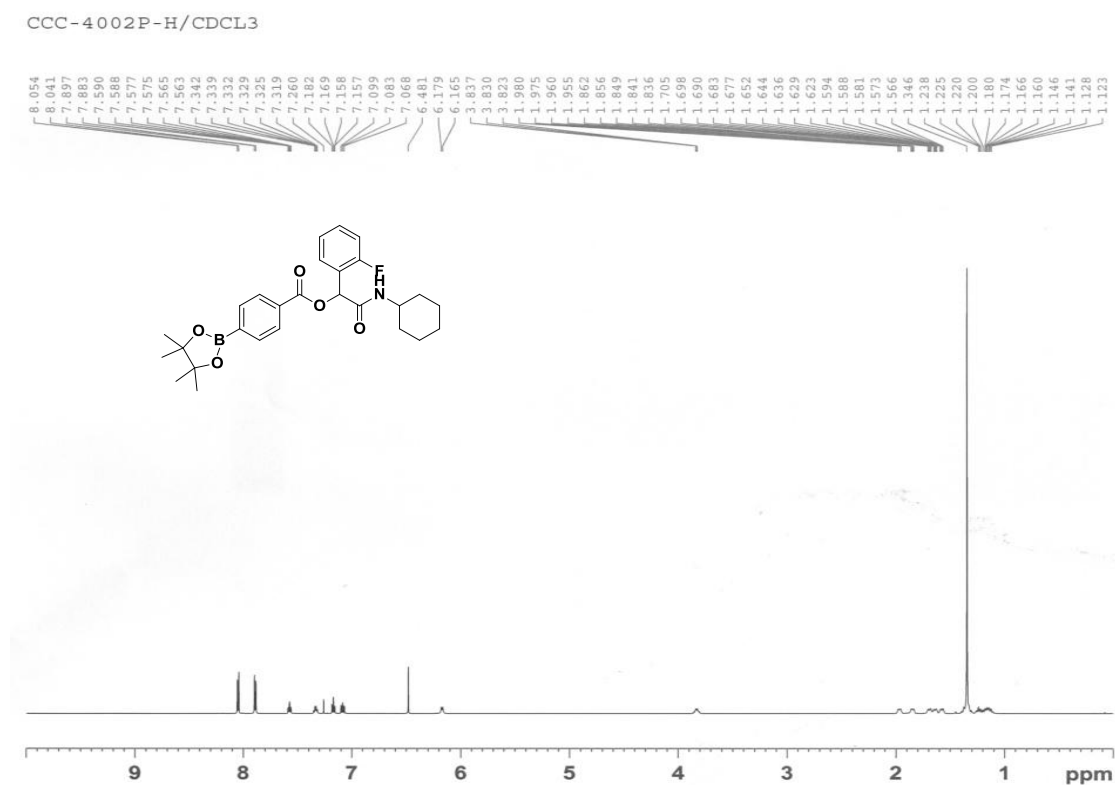

**Figure S27.** 600 MHz  $^{13}\text{C}$ -NMR of Compound (A7) in Chloroform-*d*.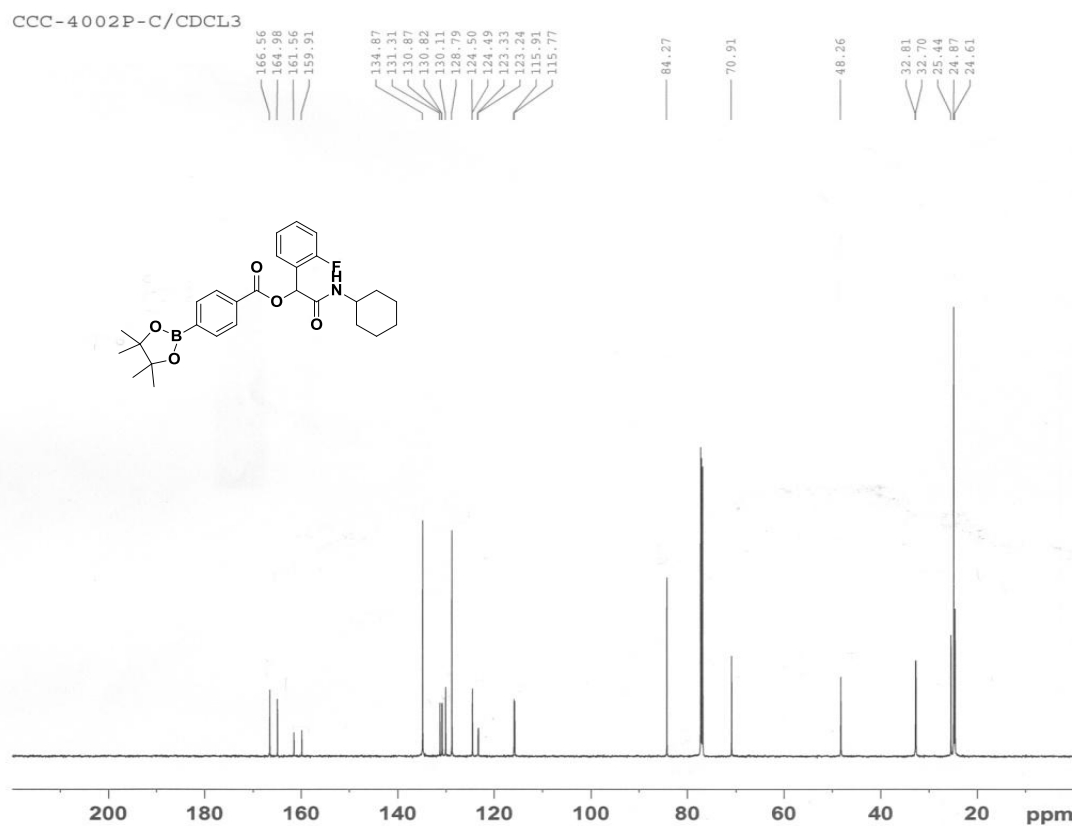**Figure S28.** 600 MHz  $^{11}\text{B}$ -NMR of Compound (A7) in Chloroform-*d*.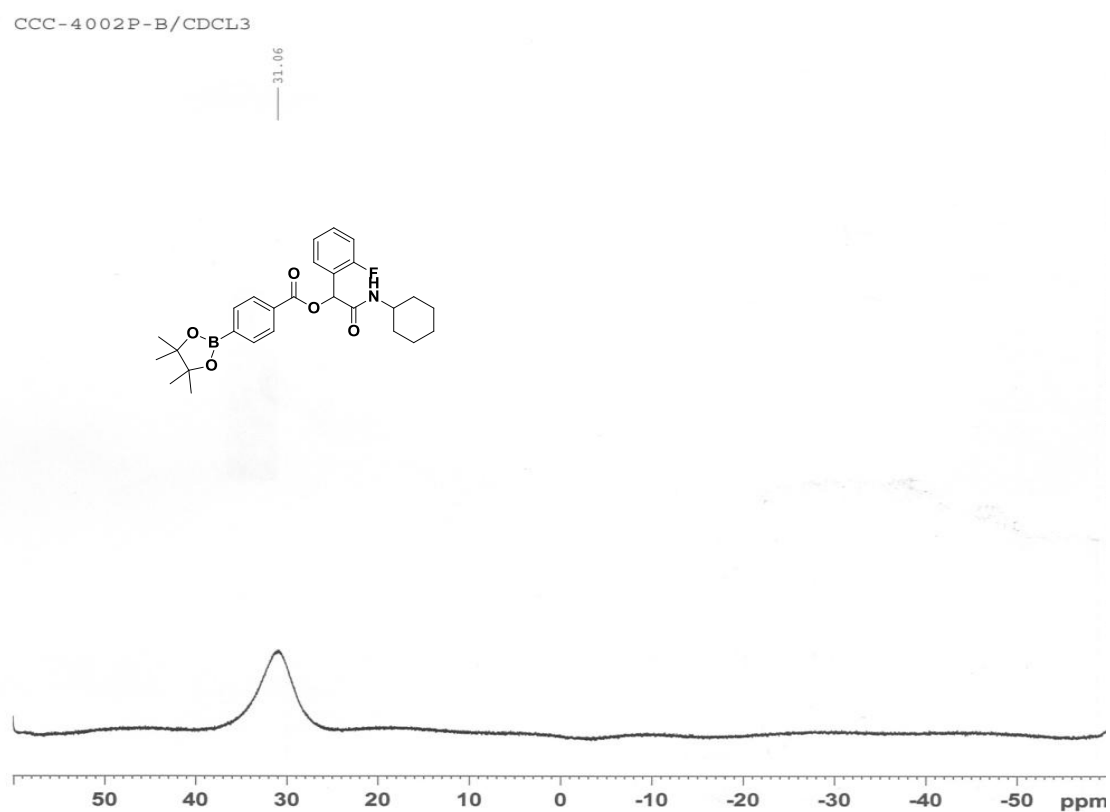

**Figure S29.** HRMS (ESI, positive ion)  $[M+H]^+$  of Compound (A8).

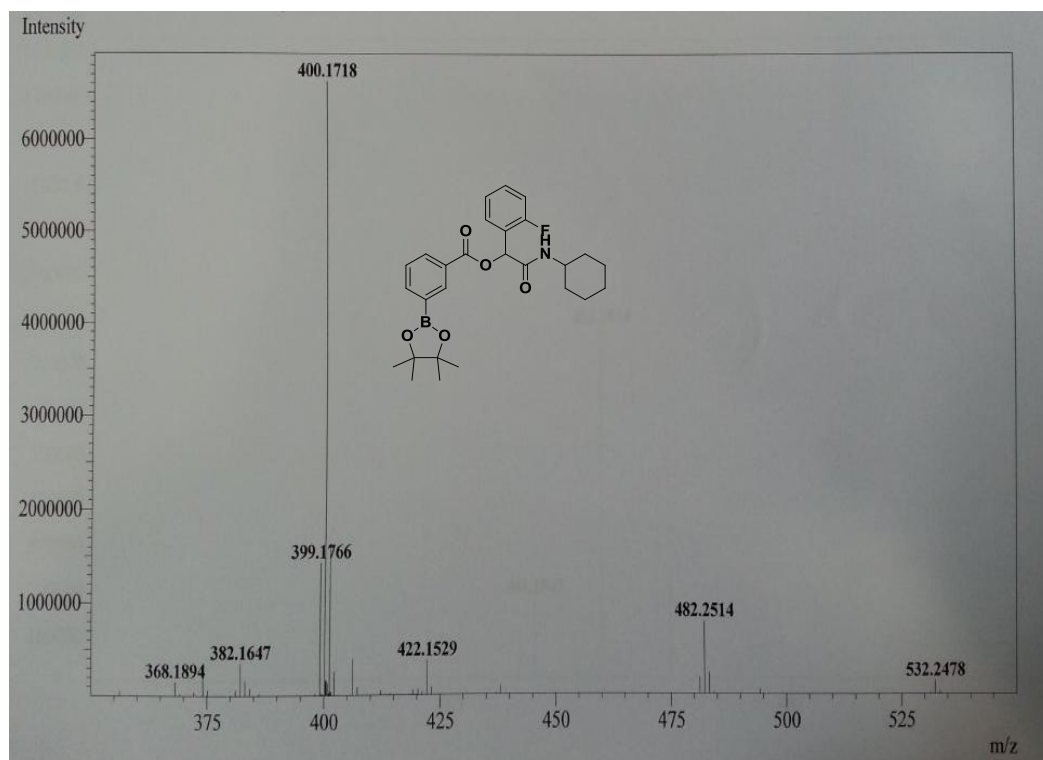

**Figure S30.** 600 MHz  $^1\text{H}$ -NMR of Compound (**A8**) in Chloroform- $d$ .

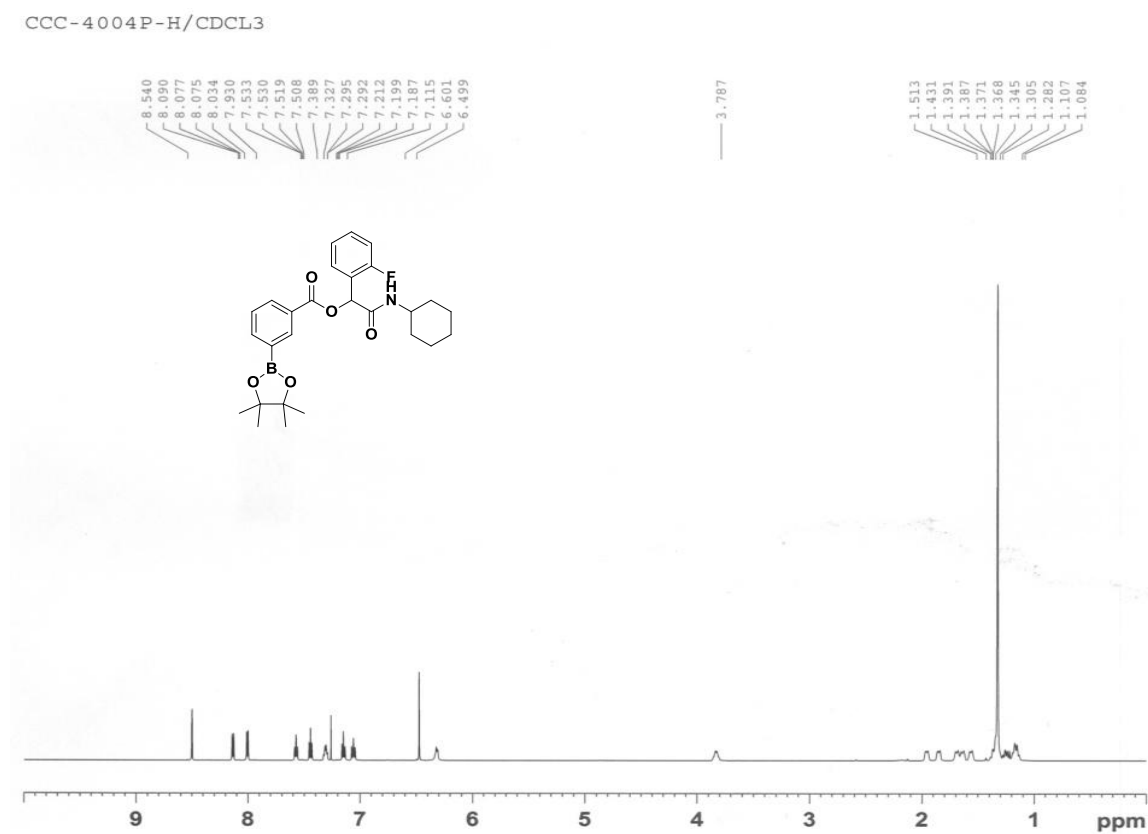

**Figure S31.** 600 MHz  $^{13}\text{C}$ -NMR of Compound (A8) in Chloroform-*d*.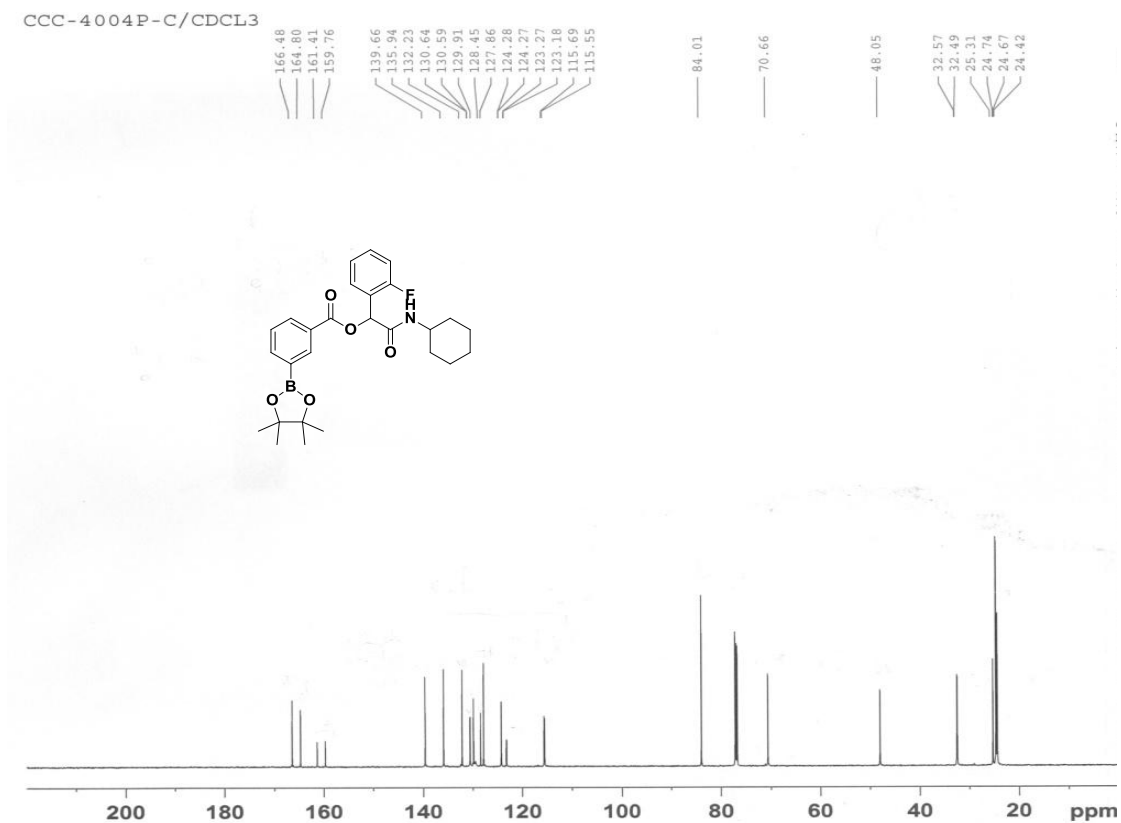**Figure S32.** 600 MHz  $^{11}\text{B}$ -NMR of Compound (A8) in Chloroform-*d*.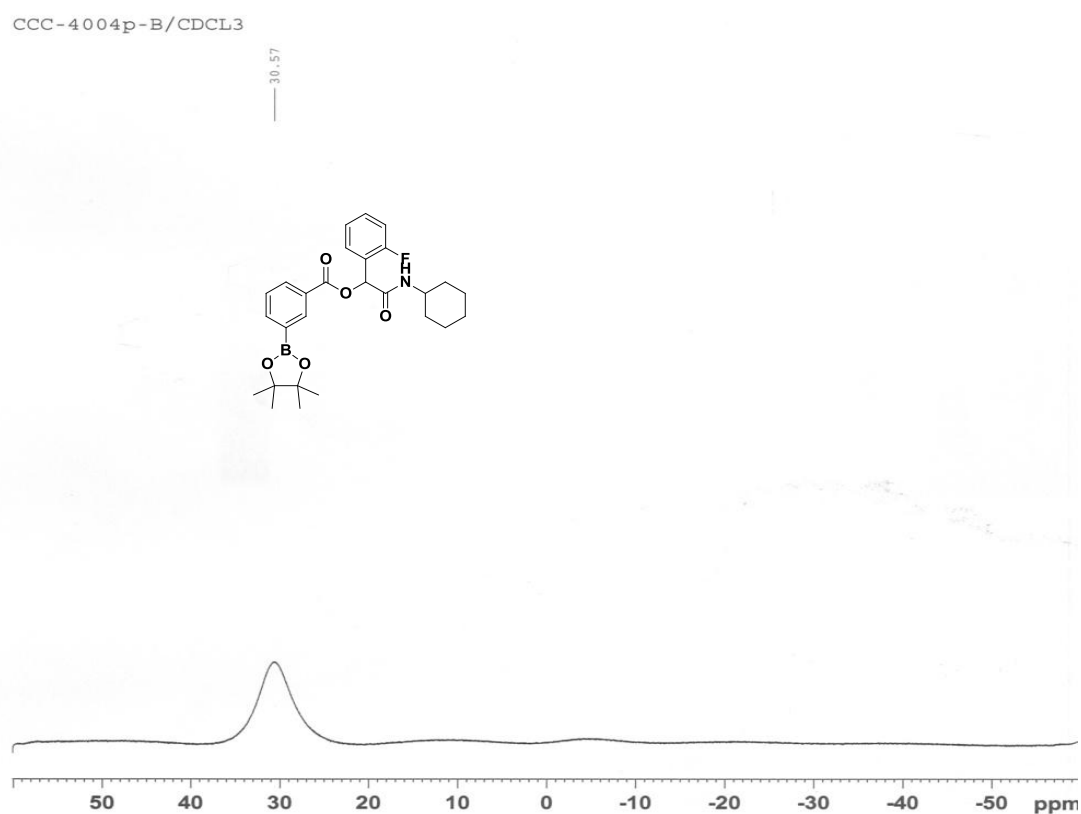



**Figure S33.** HRMS (ESI, positive ion)  $[M+H]^+$  of Compound (A9).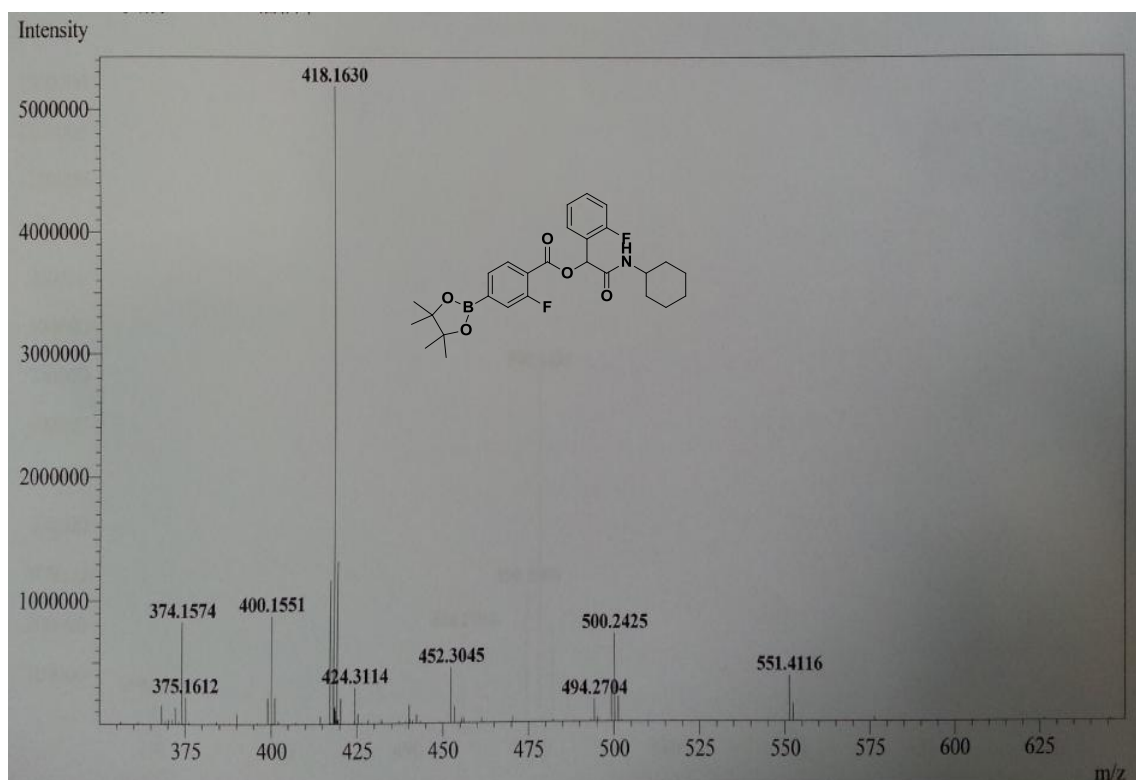**Figure S34.** 600 MHz  $^1\text{H}$ -NMR of Compound (A9) in Chloroform-*d*.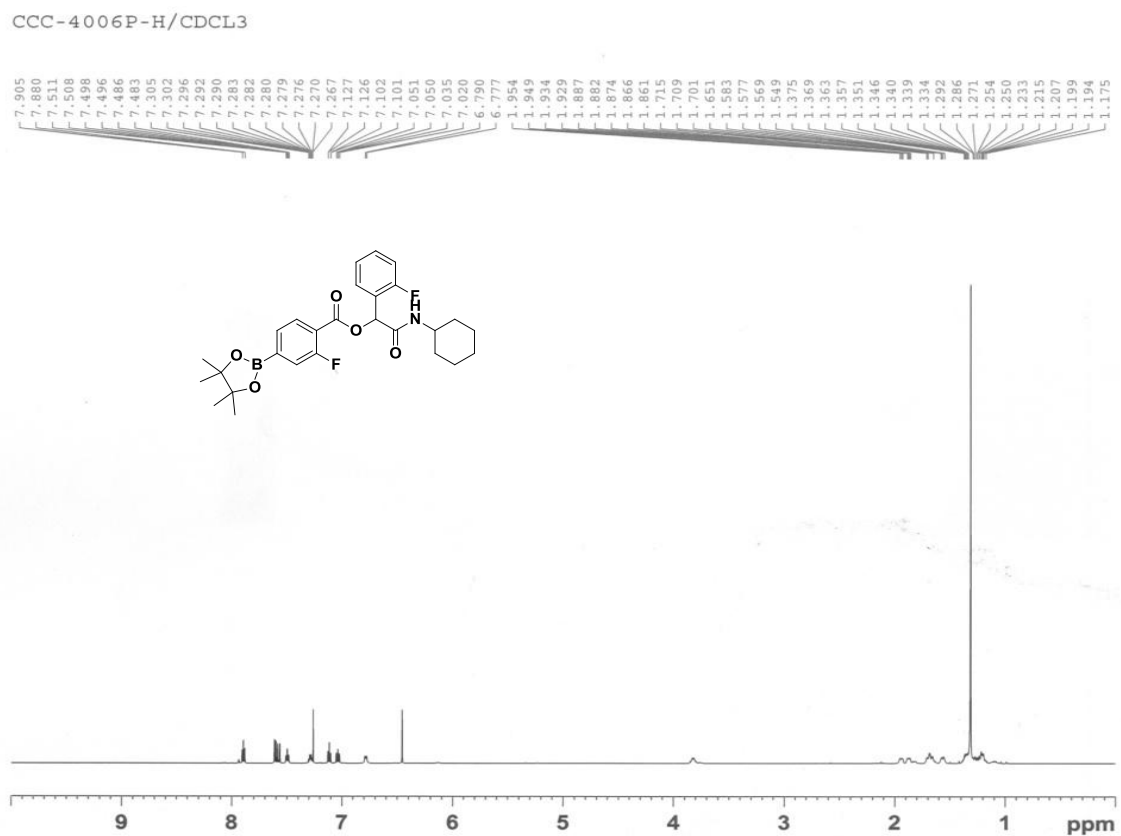

**Figure S35.** 600 MHz  $^{13}\text{C}$ -NMR of Compound (A9) in Chloroform-*d*.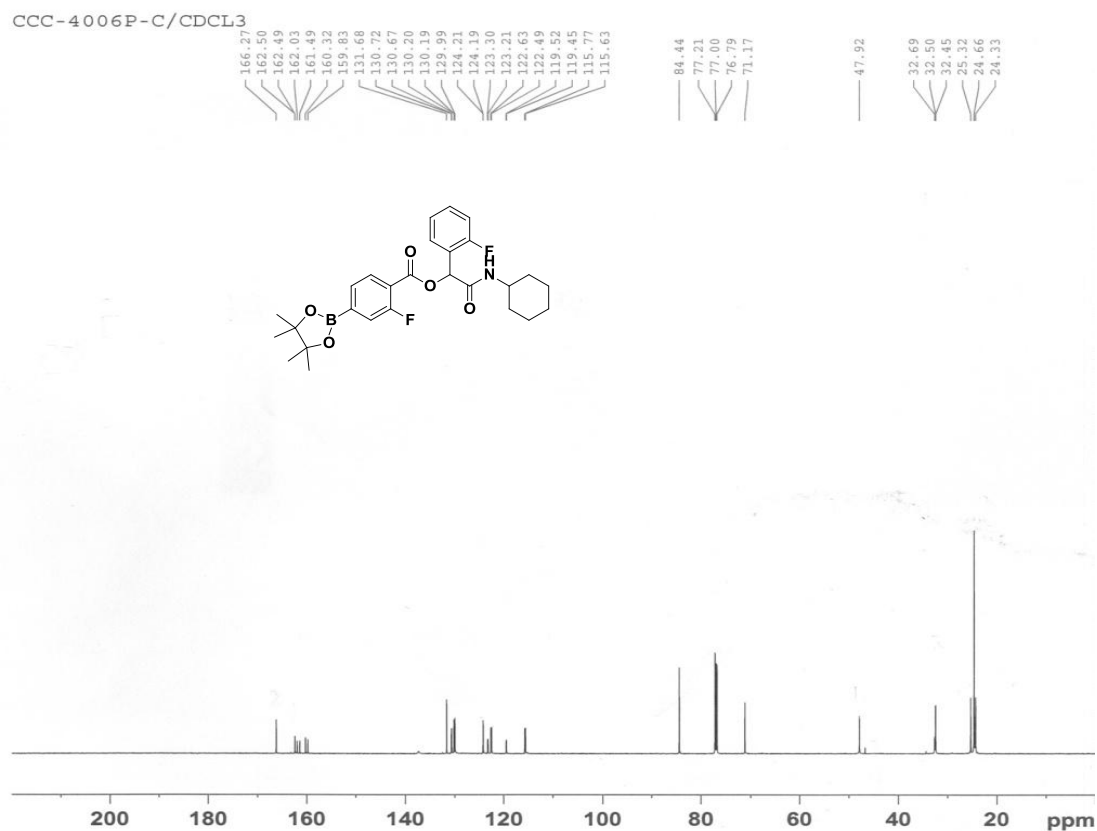**Figure S36.** 600 MHz  $^{11}\text{B}$ -NMR of Compound (A9) in Chloroform-*d*.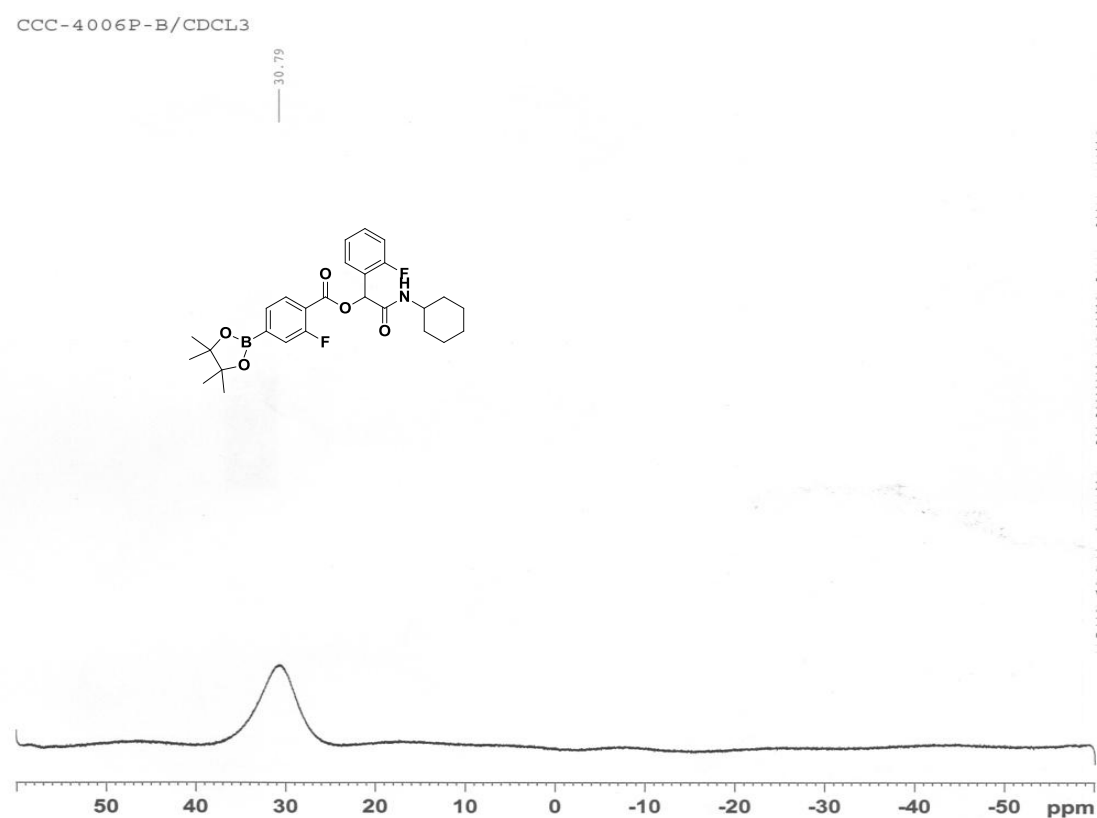

**Figure S37.** HRMS (ESI, positive ion)  $[M+H]^+$  of Compound (**A10**).

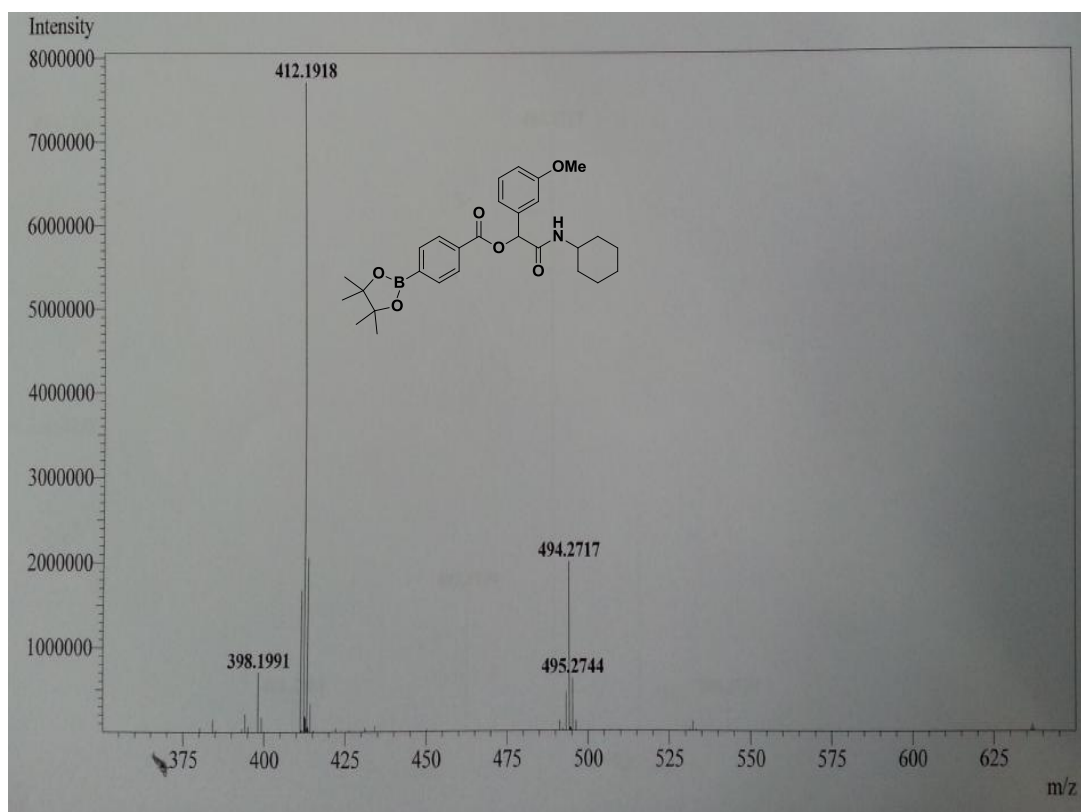

**Figure S38.** 600 MHz  $^1\text{H}$ -NMR of Compound (**A10**) in Chloroform- $d$ .

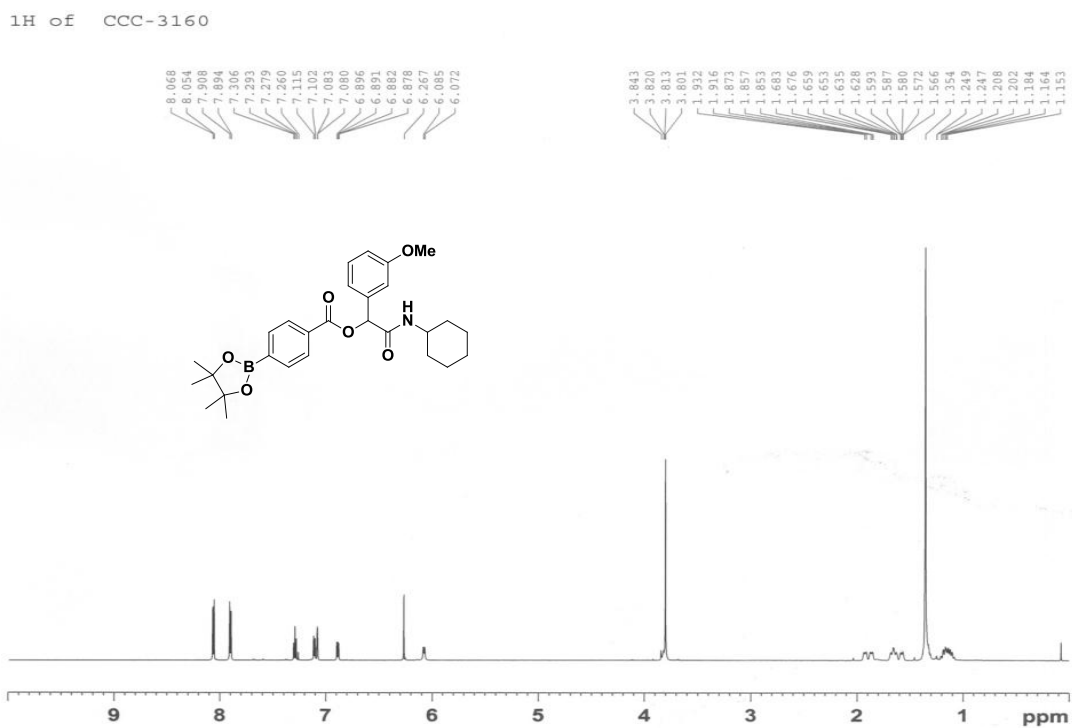

**Figure S39.** 600 MHz  $^{13}\text{C}$ -NMR of Compound (A10) in Chloroform-*d*.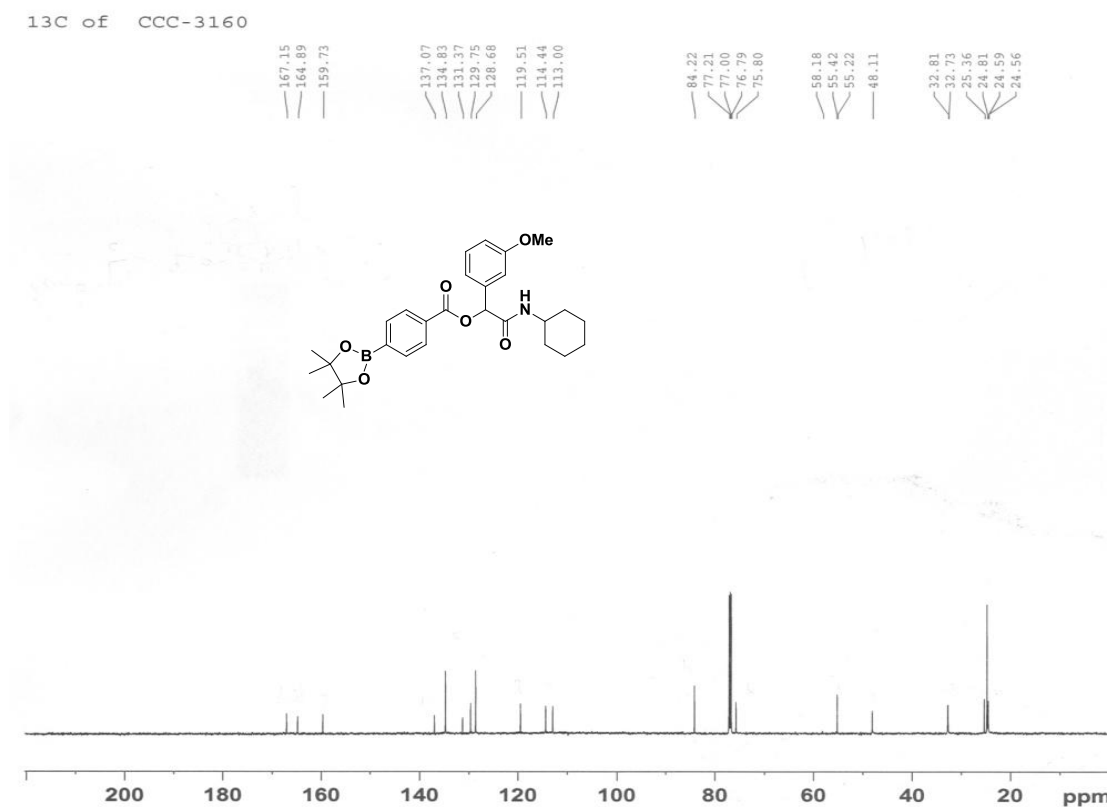**Figure S40.** 600 MHz  $^{11}\text{B}$ -NMR of Compound (A10) in Chloroform-*d*.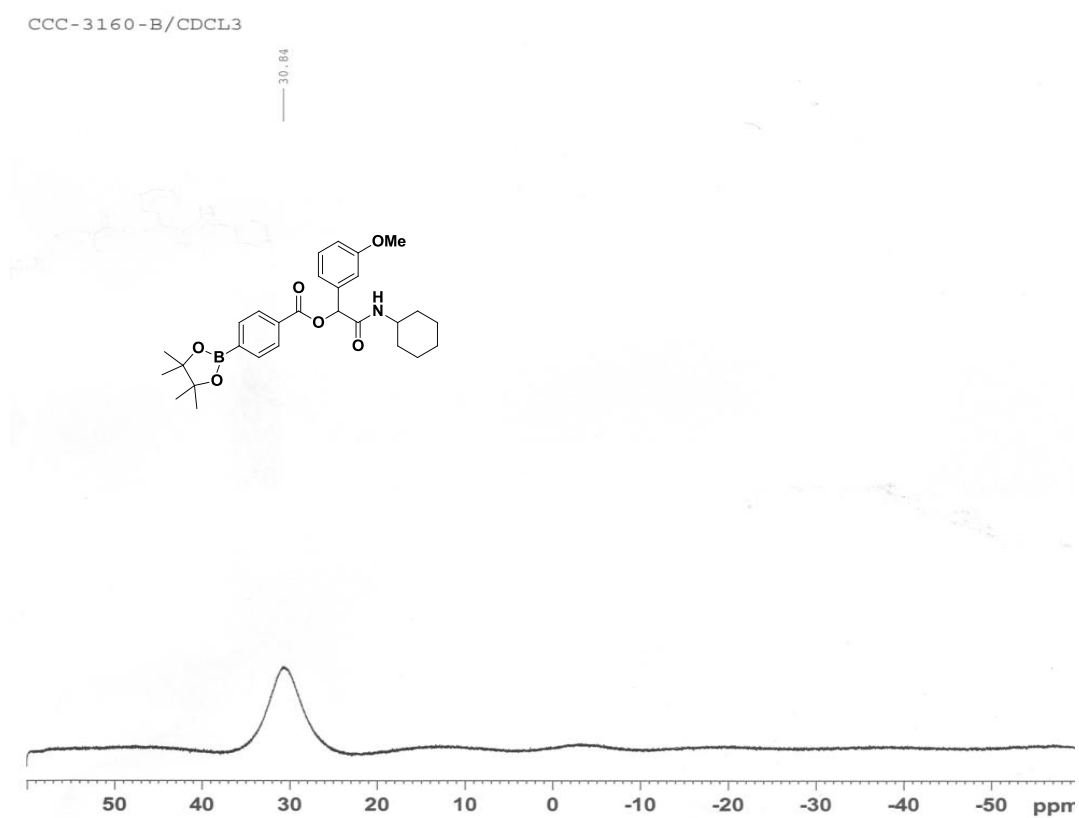

**Figure S41.** HRMS (ESI, positive ion)  $[M+H]^+$  of Compound (A11).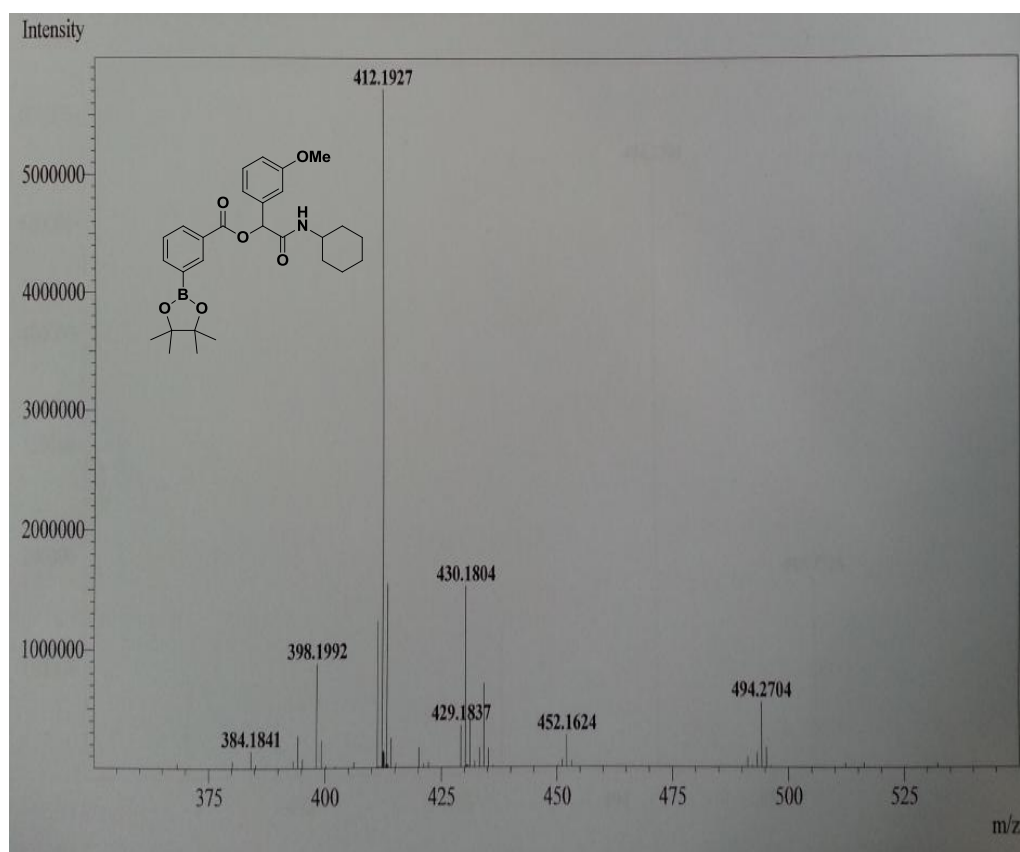**Figure S42.** 600 MHz  $^1\text{H}$ -NMR of Compound (A11) in Chloroform- $d$ .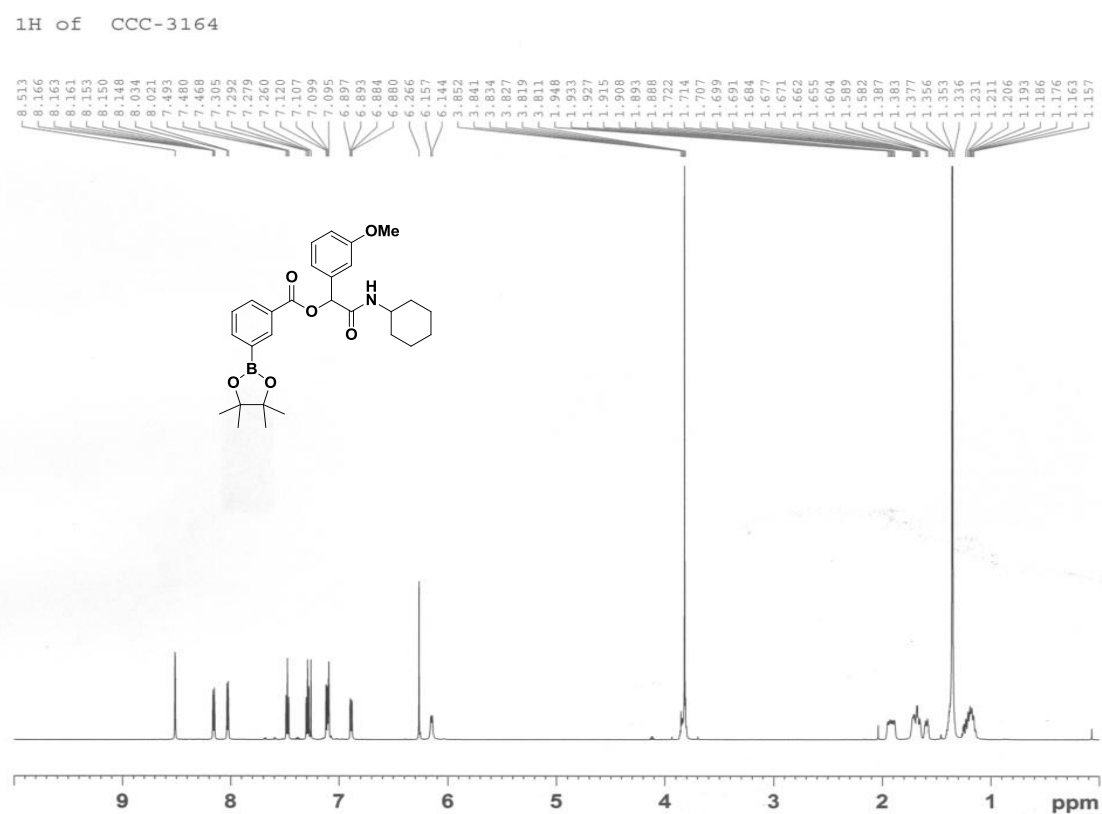

**Figure S43.** 600 MHz  $^{13}\text{C}$ -NMR of Compound (A11) in Chloroform-*d*.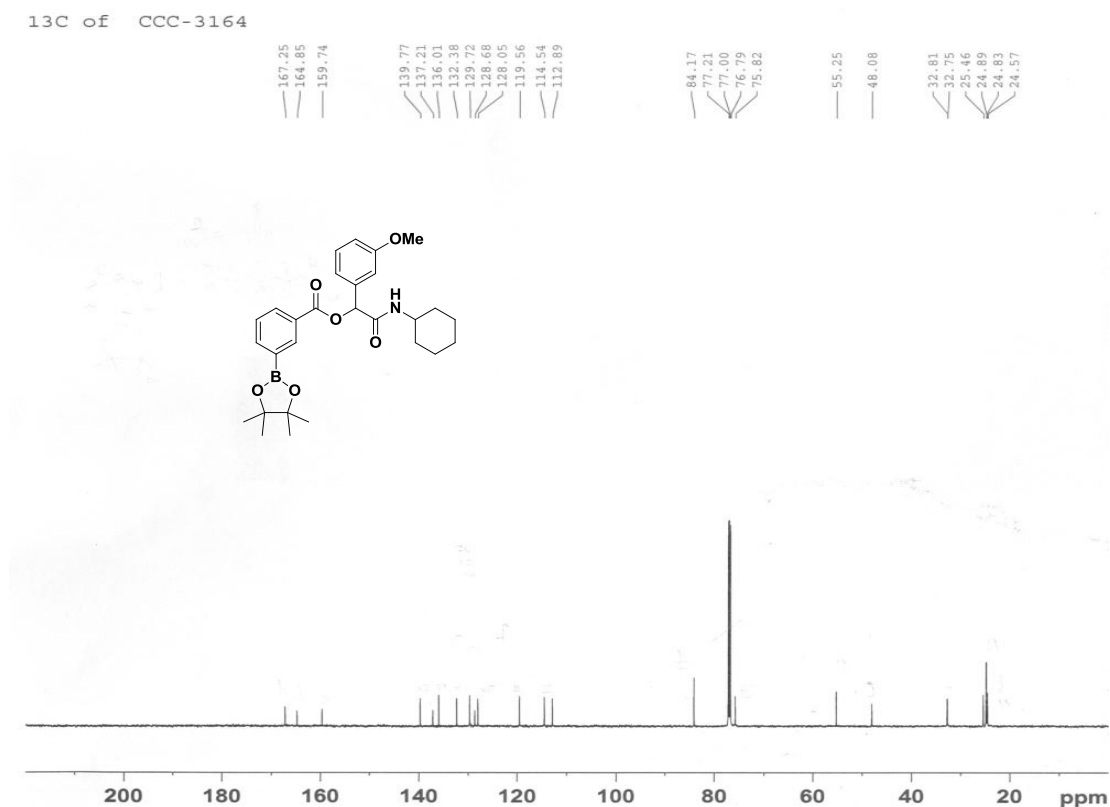**Figure S44.** 600 MHz  $^{11}\text{B}$ -NMR of Compound (A11) in Chloroform-*d*.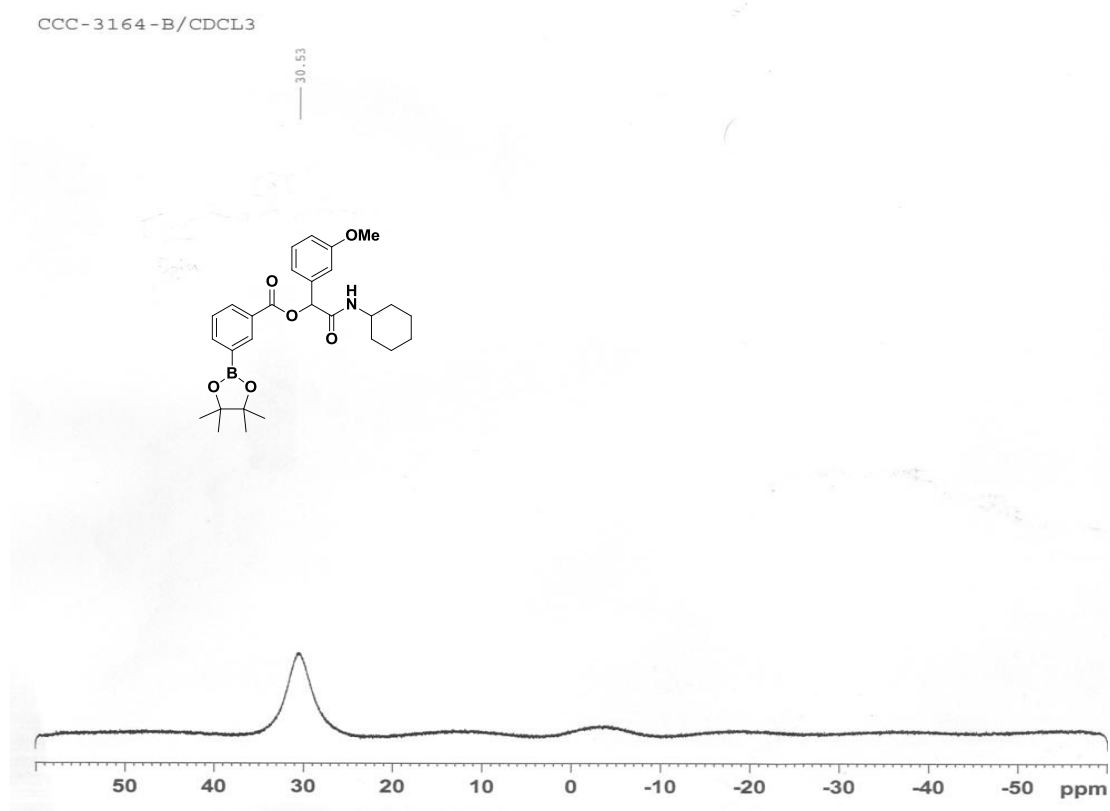

**Figure S45.** HRMS (ESI, positive ion)  $[M+H]^+$  of Compound (A12).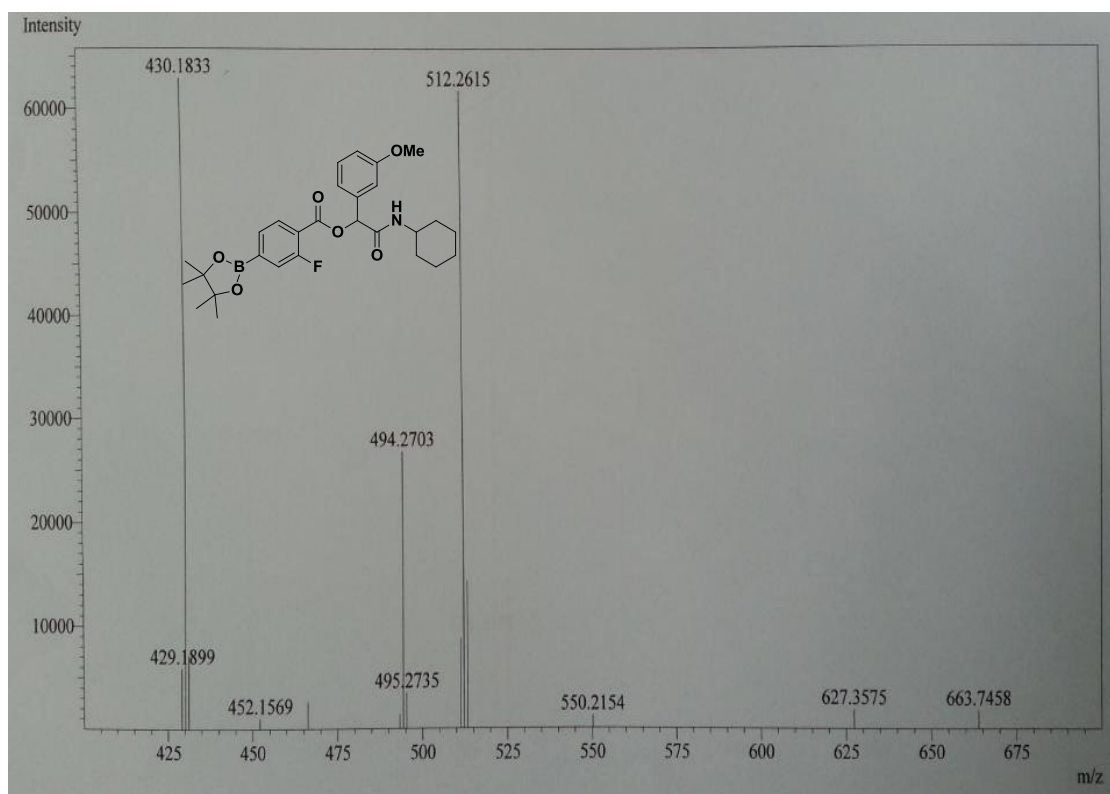**Figure S46.** 600 MHz  $^1\text{H}$ -NMR of Compound (A12) in Chloroform- $d$ .CCC-3180P2-H/ $\text{CDCl}_3$ 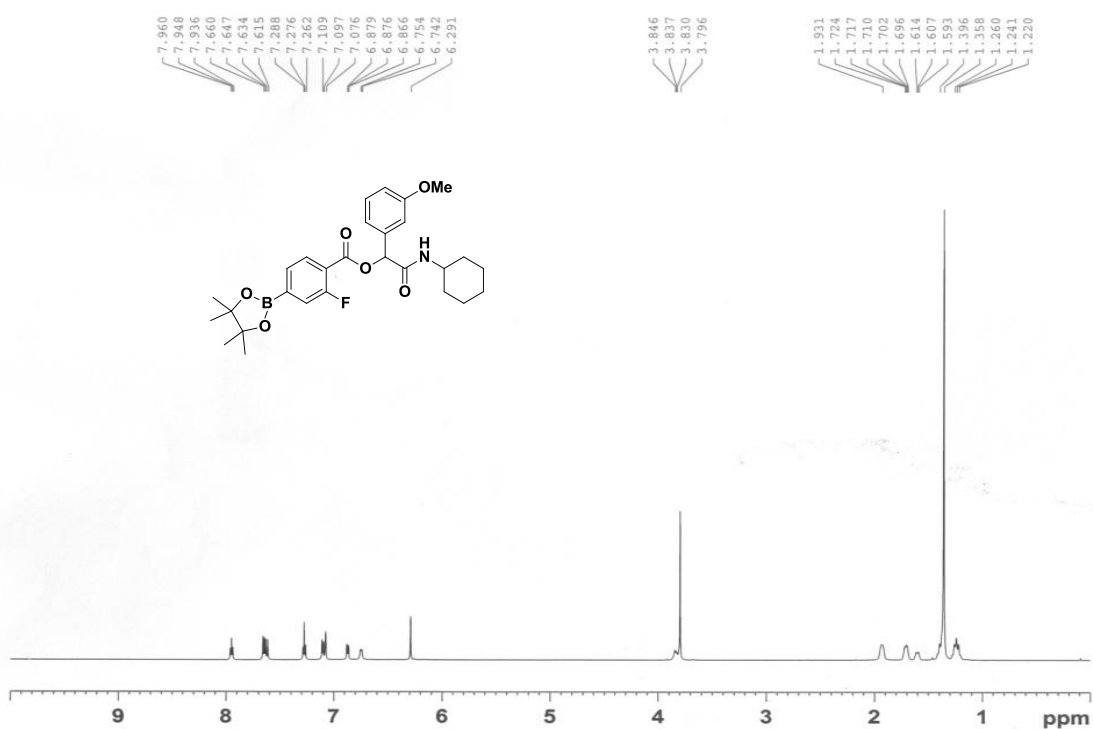

**Figure S47.** 600 MHz  $^{13}\text{C}$ -NMR of Compound (A12) in Chloroform-*d*.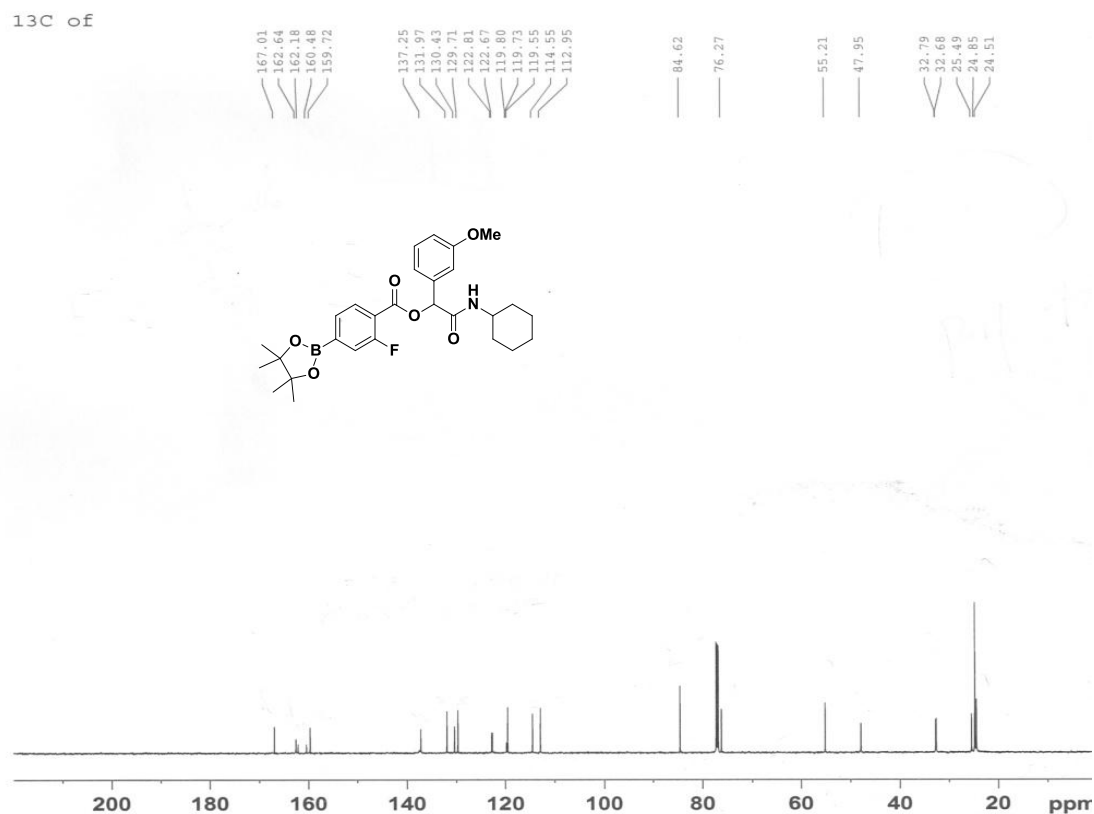**Figure S48.** 600 MHz  $^{11}\text{B}$ -NMR of Compound (A12) in Chloroform-*d*.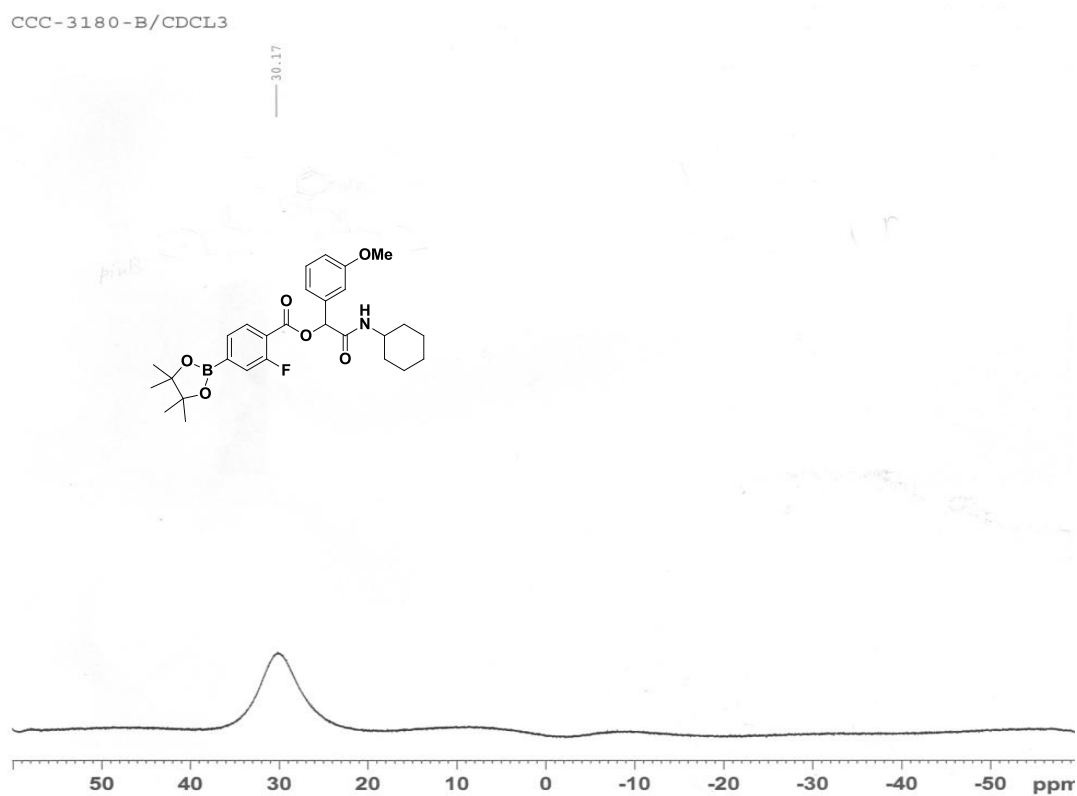



**Figure S49.** HRMS (ESI, positive ion)  $[M+H]^+$  of Compound (A13).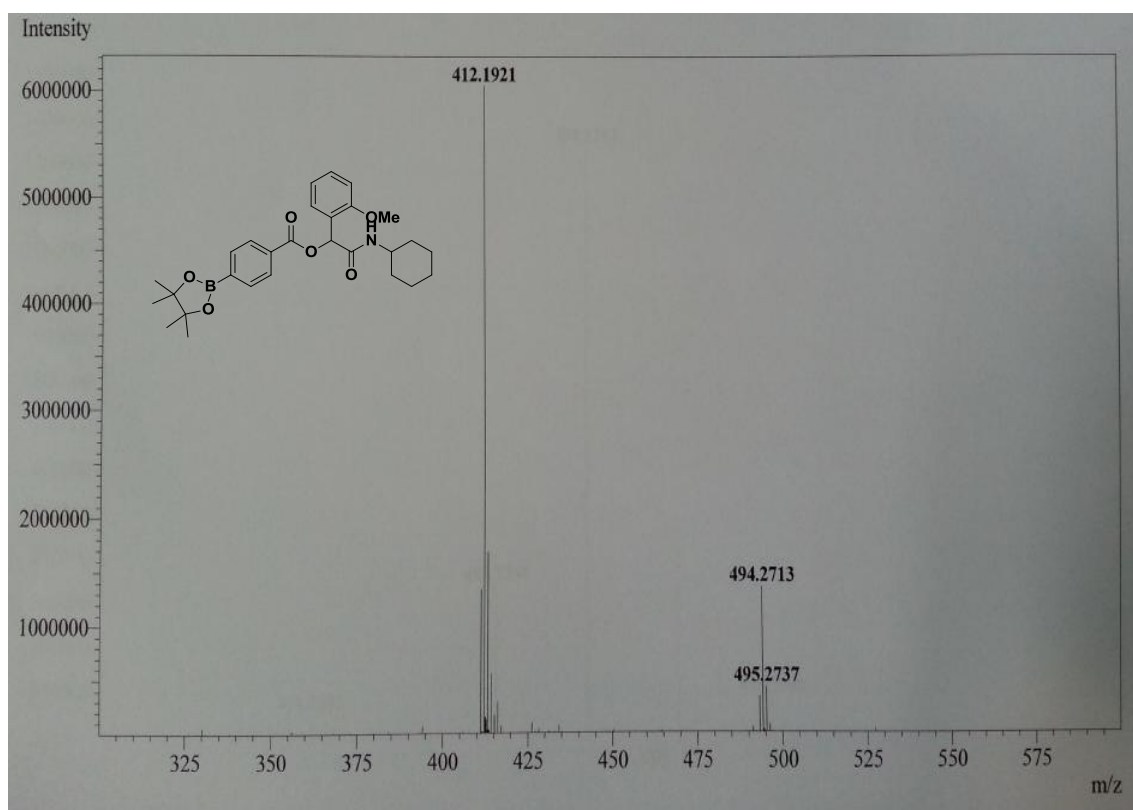**Figure S50.** 600 MHz  $^1\text{H}$ -NMR of Compound (A13) in Chloroform-*d*.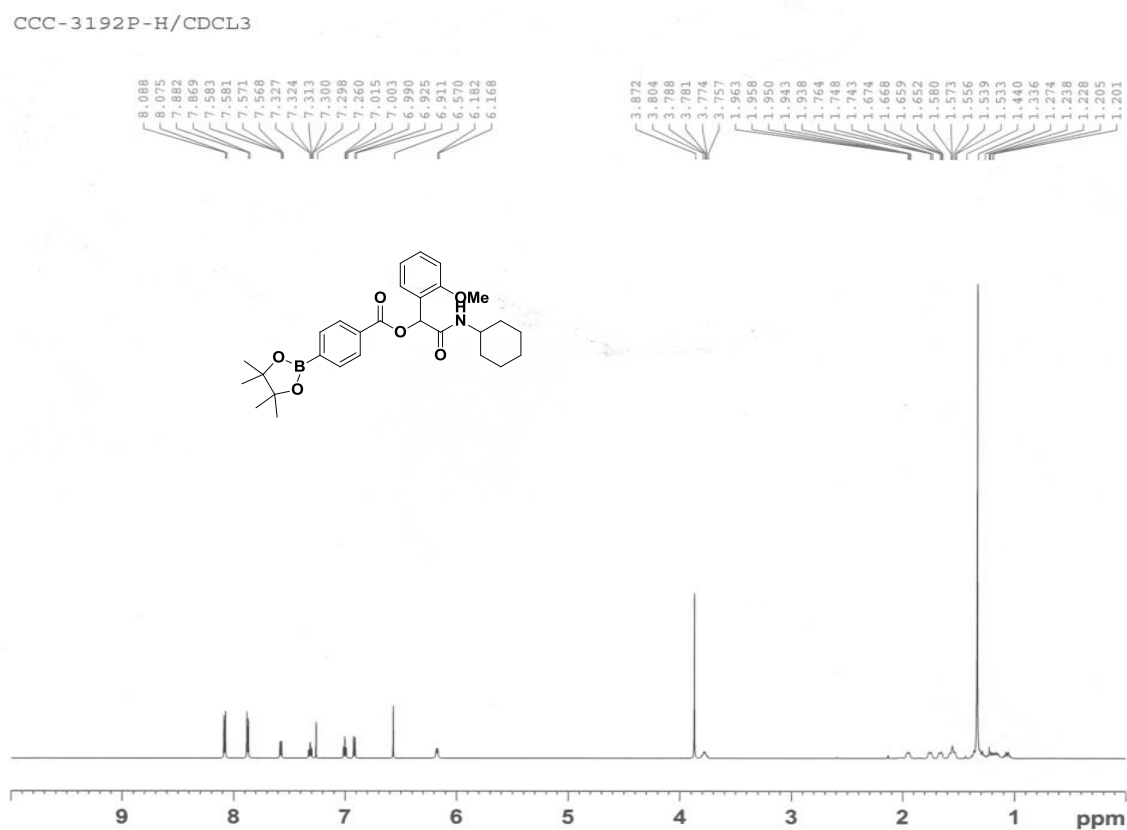

**Figure S51.** 600 MHz  $^{13}\text{C}$ -NMR of Compound (A13) in Chloroform-*d*.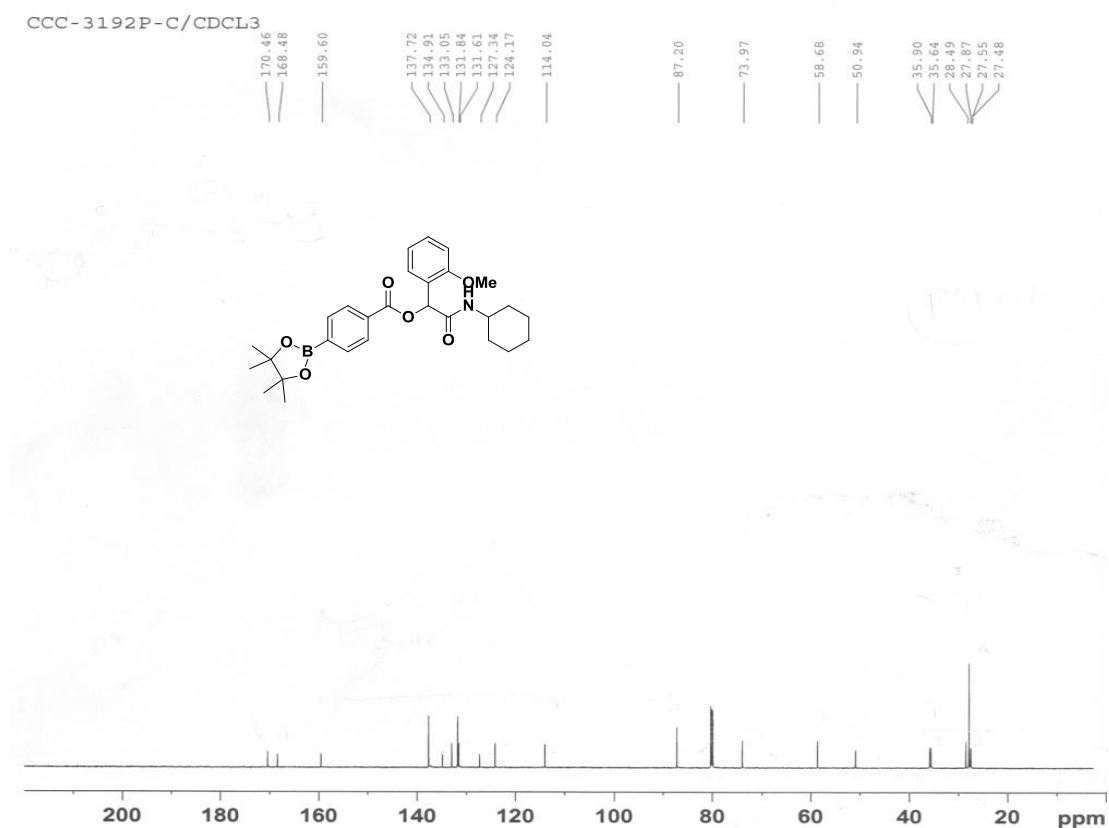**Figure S52.** 600 MHz  $^{11}\text{B}$ -NMR of Compound (A13) in Chloroform-*d*.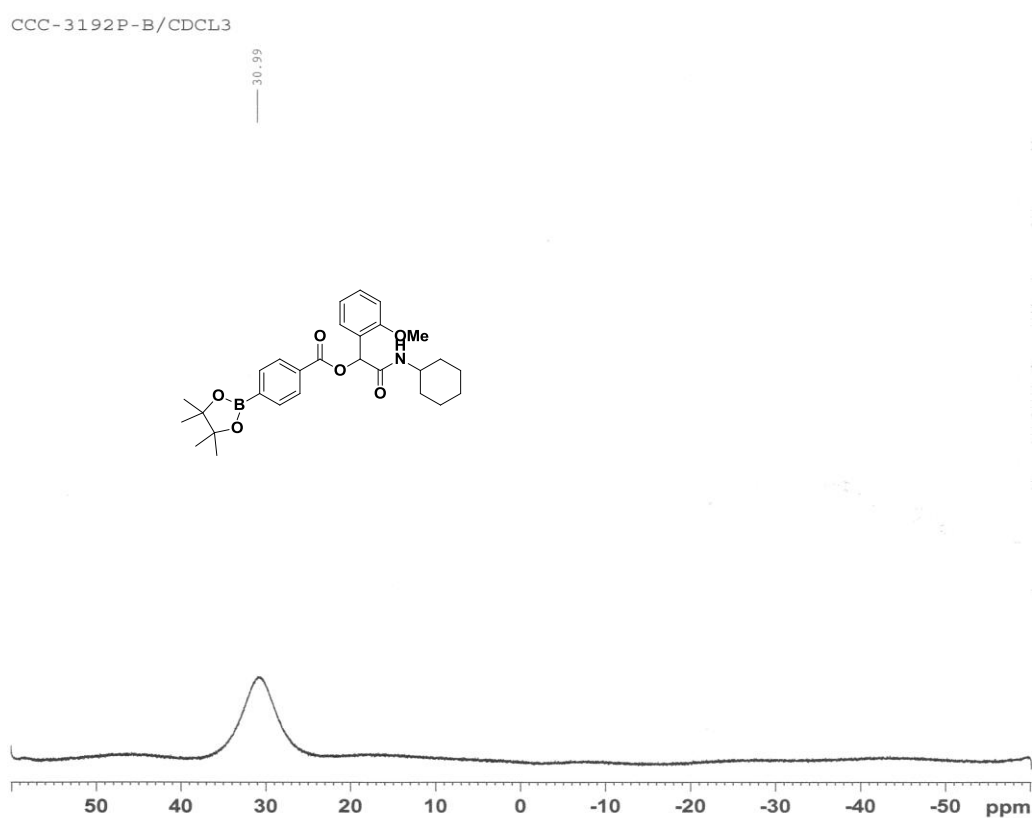

**Figure S53.** HRMS (ESI, positive ion)  $[M+H]^+$  of Compound (A14).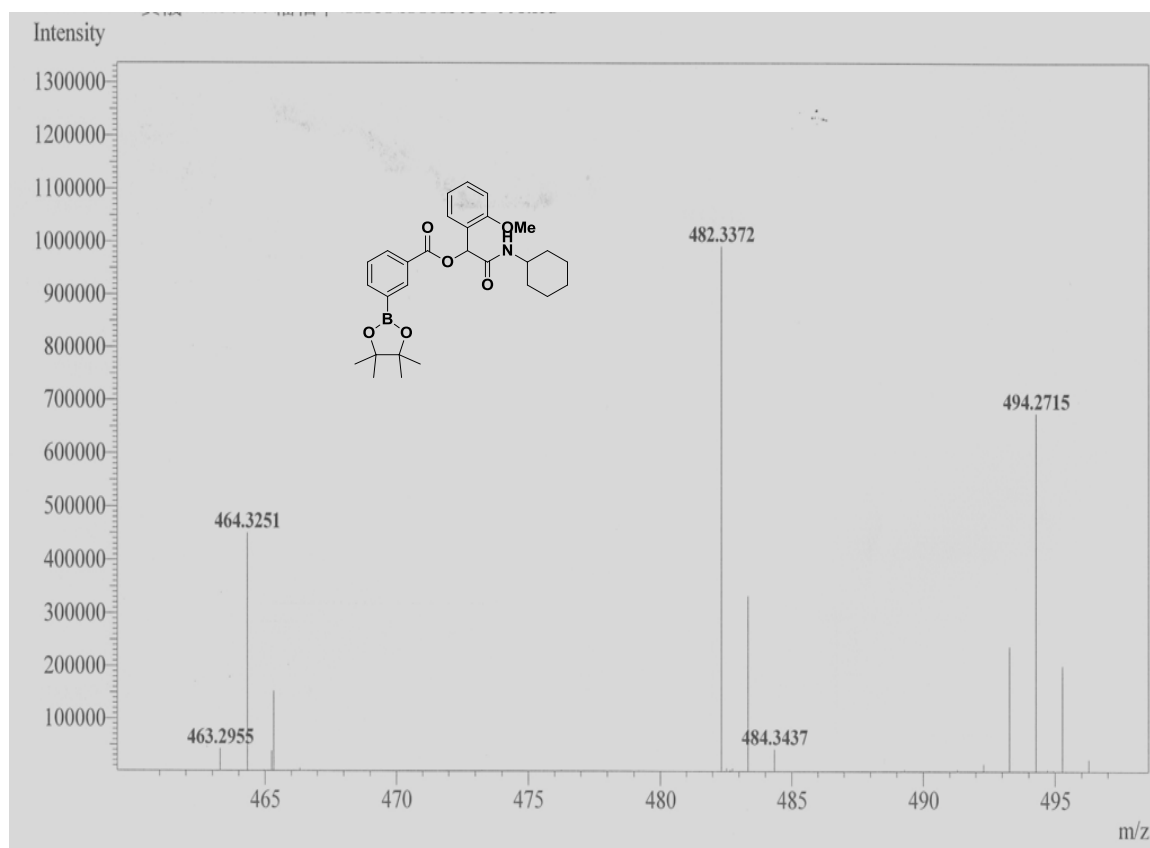**Figure S54.** 600 MHz  $^1\text{H}$ -NMR of Compound (A14) in Chloroform- $d$ .CCC-3194P-H/ $\text{CDCl}_3$ 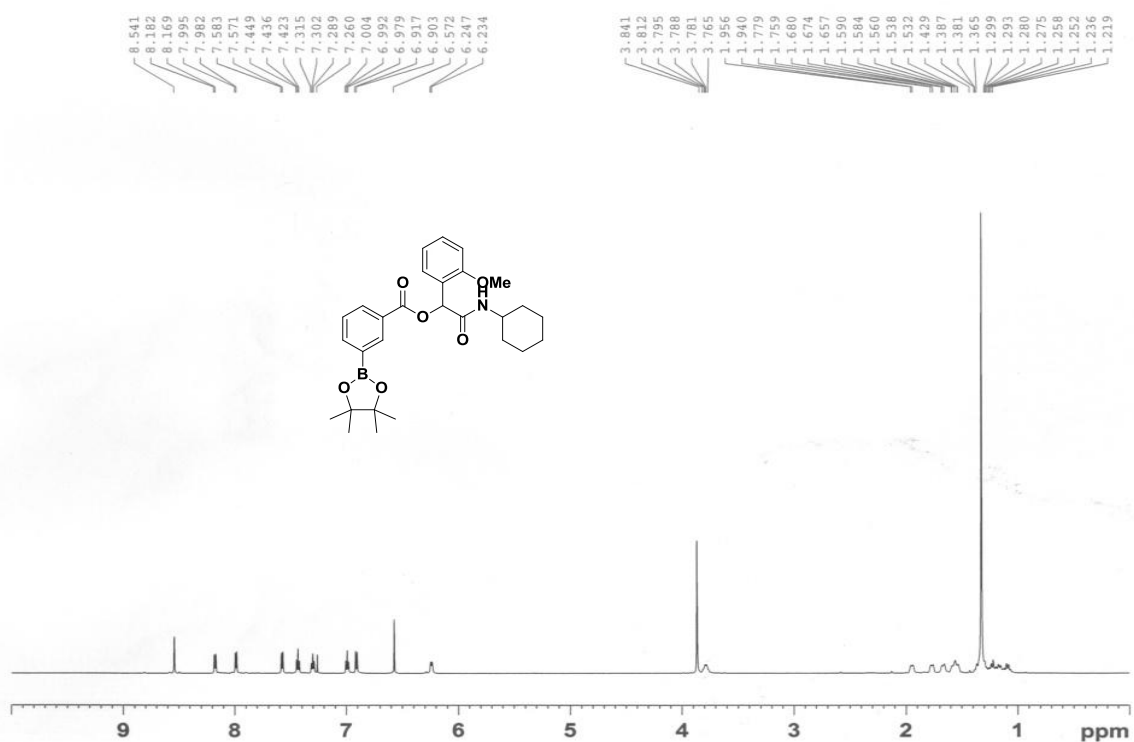

**Figure S55.** 600 MHz  $^{13}\text{C}$ -NMR of Compound (A14) in Chloroform-*d*.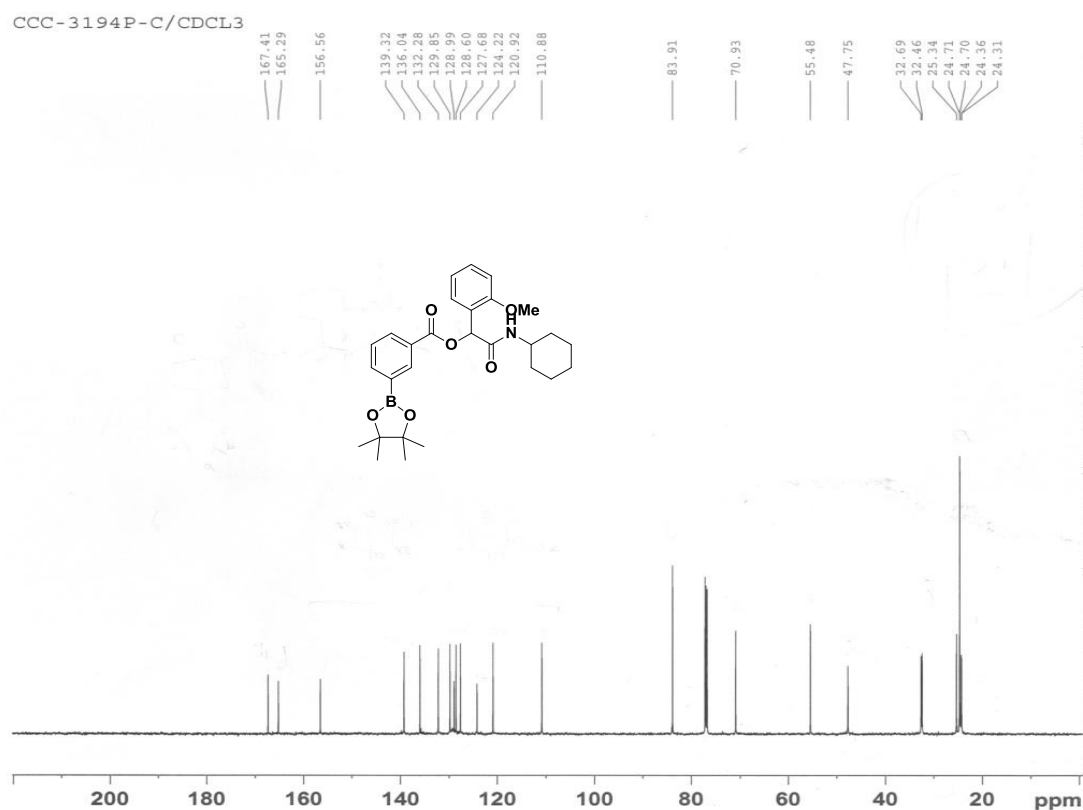**Figure S56.** 600 MHz  $^{11}\text{B}$ -NMR of Compound (A14) in Chloroform-*d*.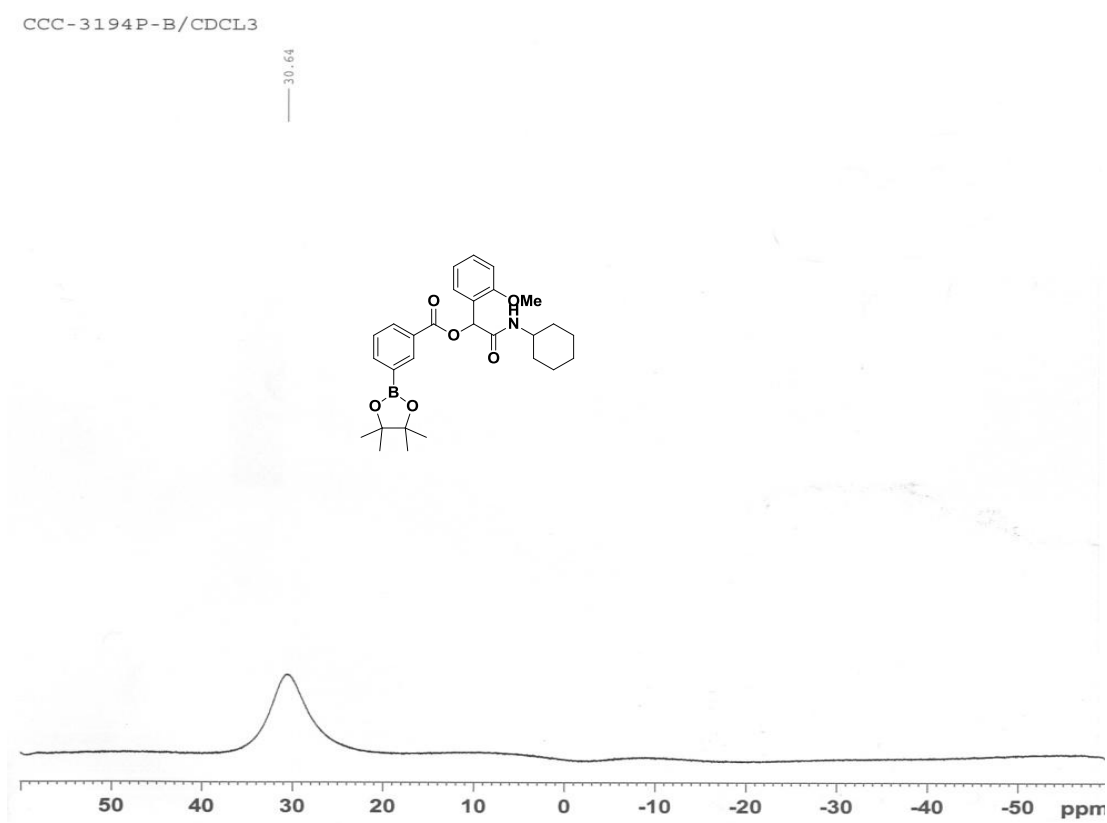

**Figure S57.** HRMS (ESI, positive ion)  $[M+H]^+$  of Compound (A15).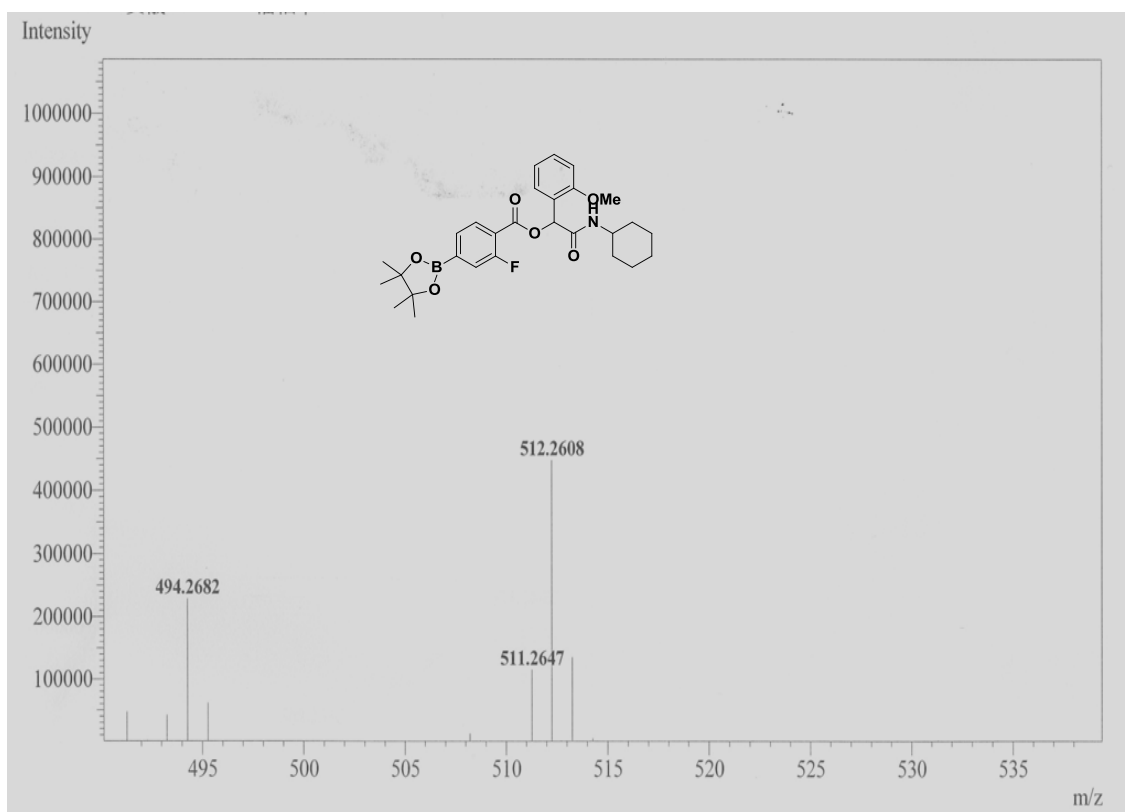**Figure S58.** 600 MHz  $^1\text{H}$ -NMR of Compound (A15) in Chloroform-*d*.CCC-3196P-H/CDCL<sub>3</sub>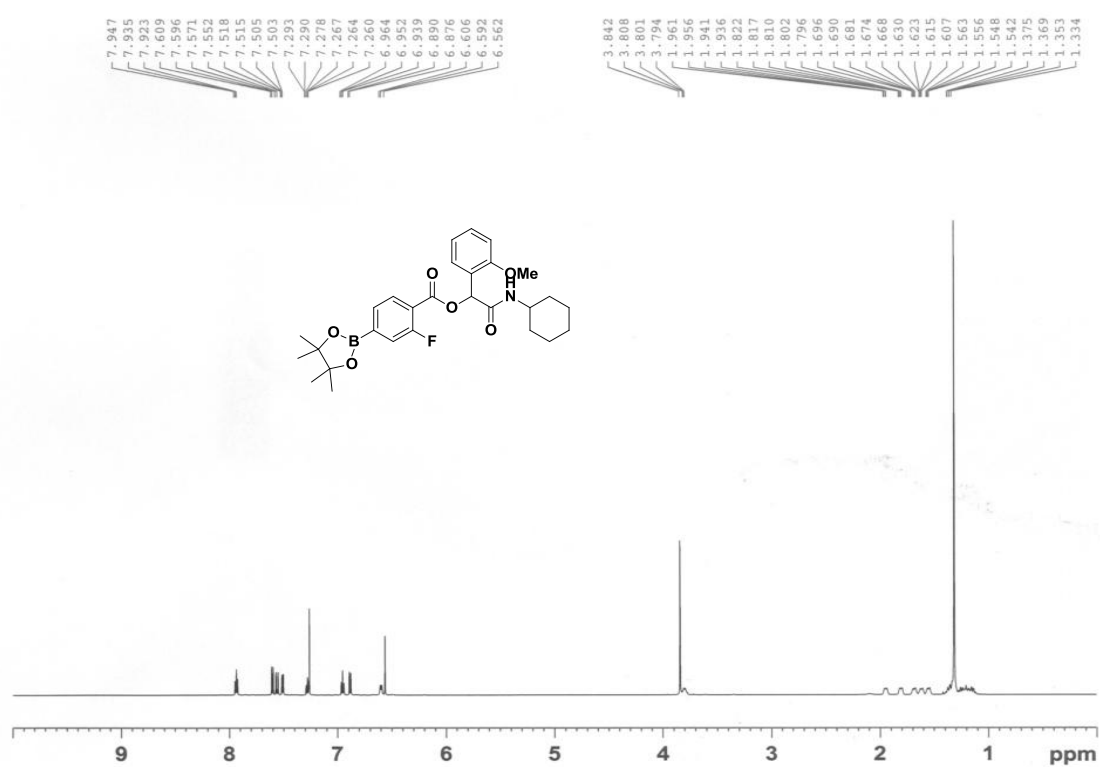

**Figure S59.** 600 MHz  $^{13}\text{C}$ -NMR of Compound (A15) in Chloroform-*d*.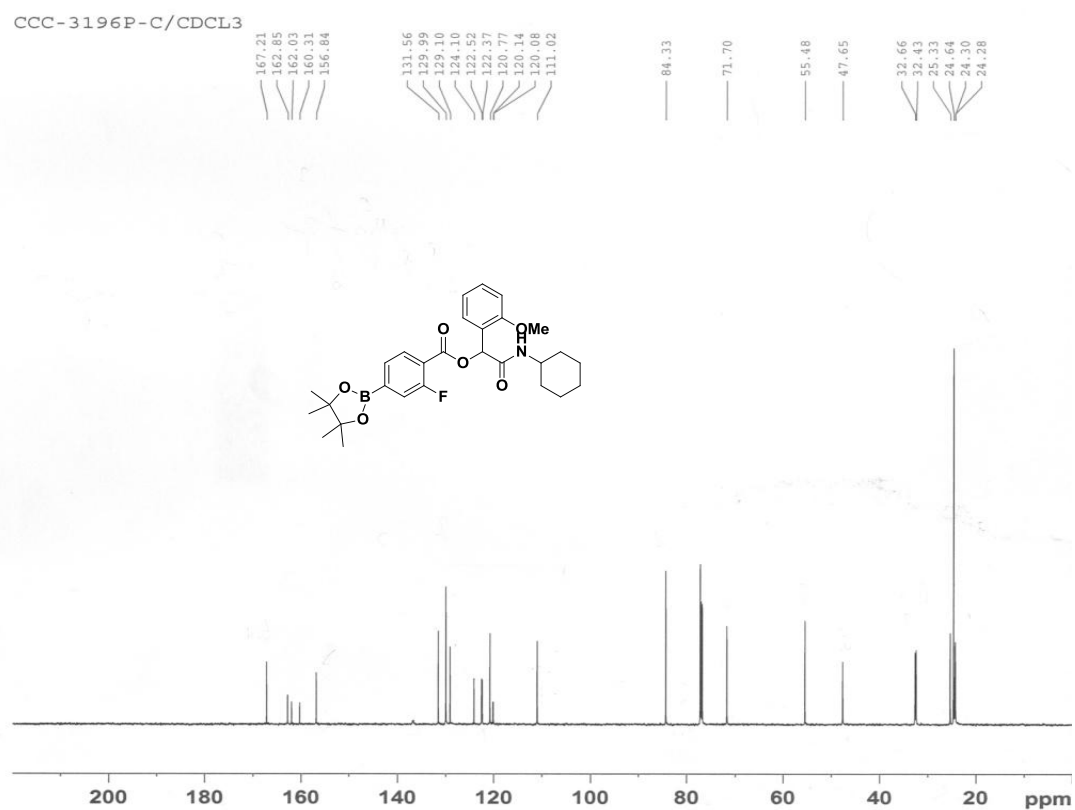**Figure S60.** 600 MHz  $^{11}\text{B}$ -NMR of Compound (A15) in Chloroform-*d*.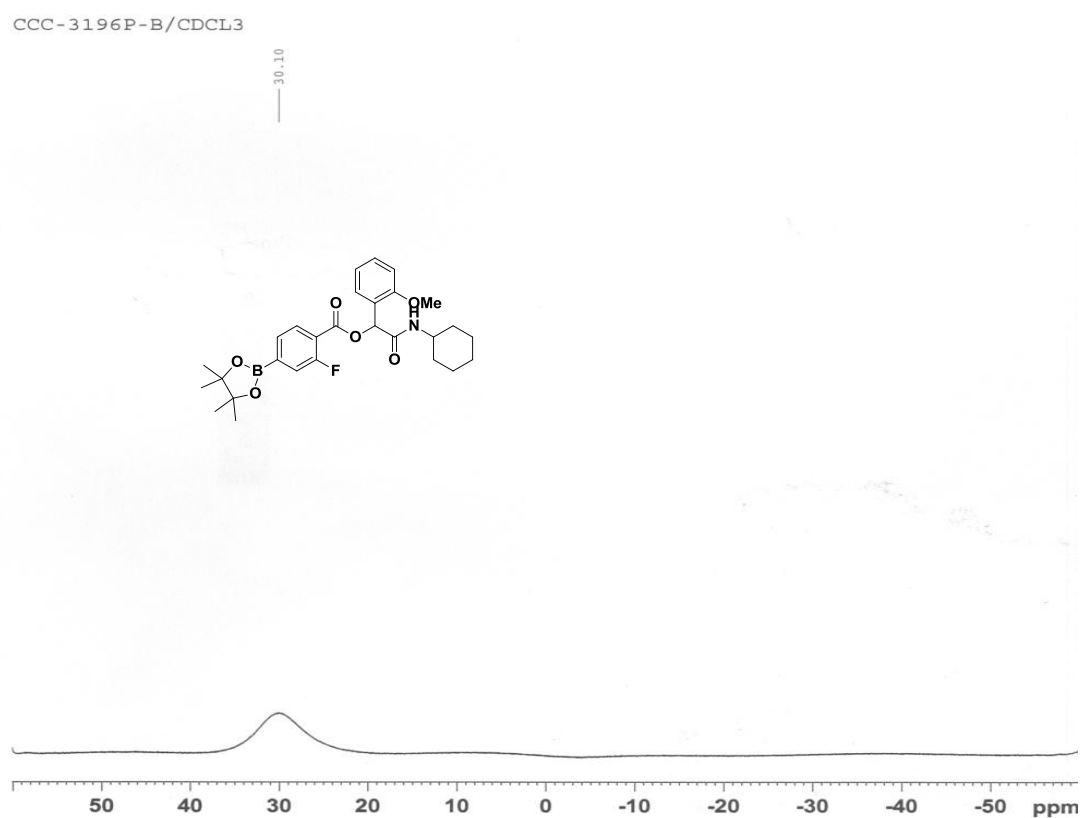

**Figure S61.** HRMS (ESI, positive ion)  $[M+H]^+$  of Compound (A16).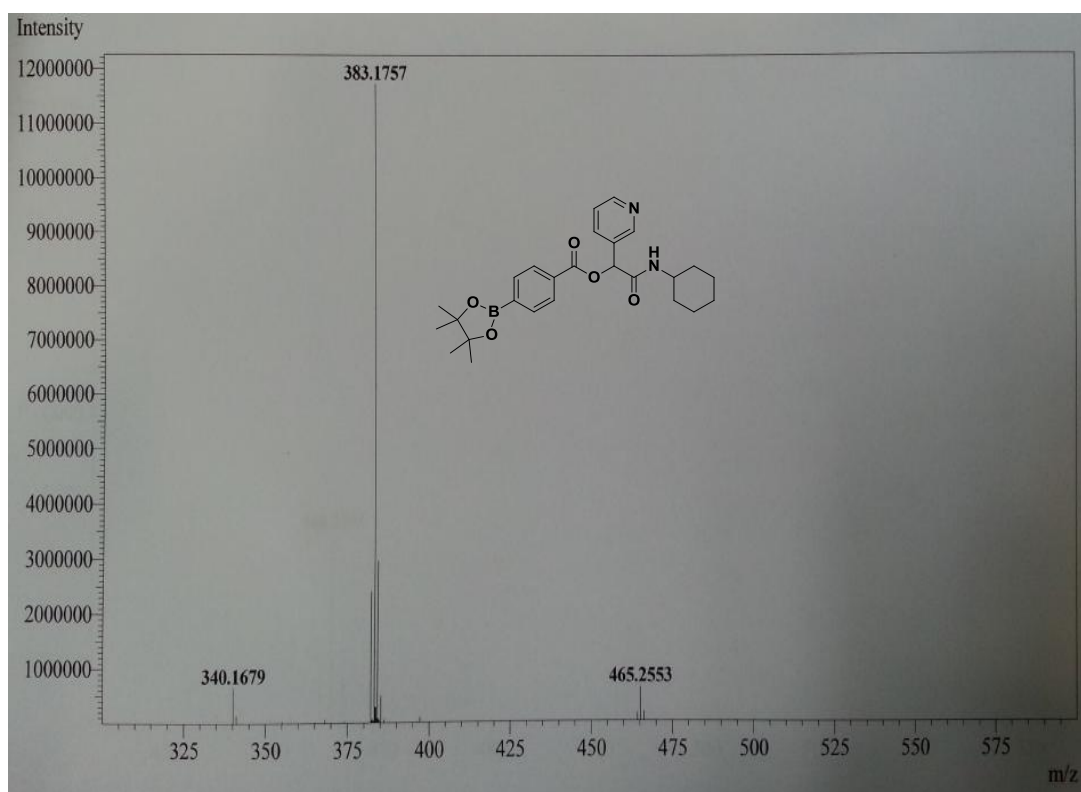**Figure S62.** 600 MHz  $^1\text{H}$ -NMR of Compound (A16) in Chloroform-*d*.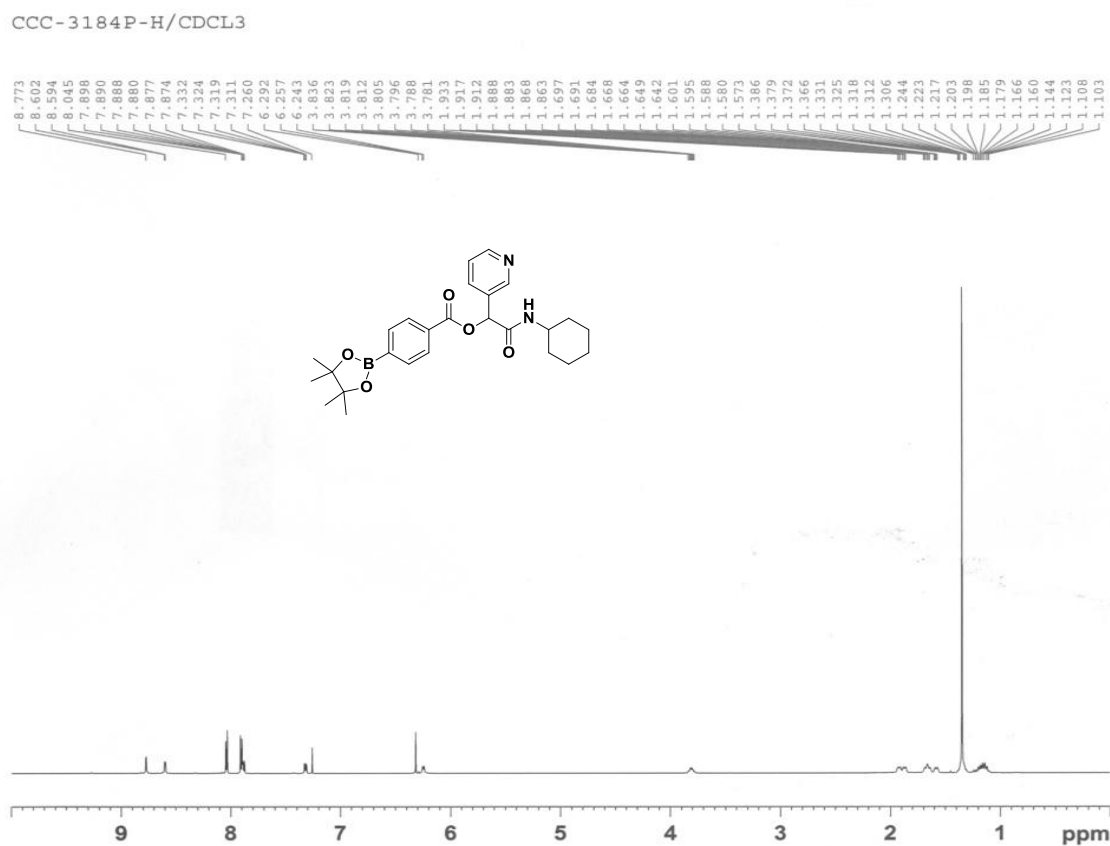

**Figure S63.** 600 MHz  $^{13}\text{C}$ -NMR of Compound (A16) in Chloroform-*d*.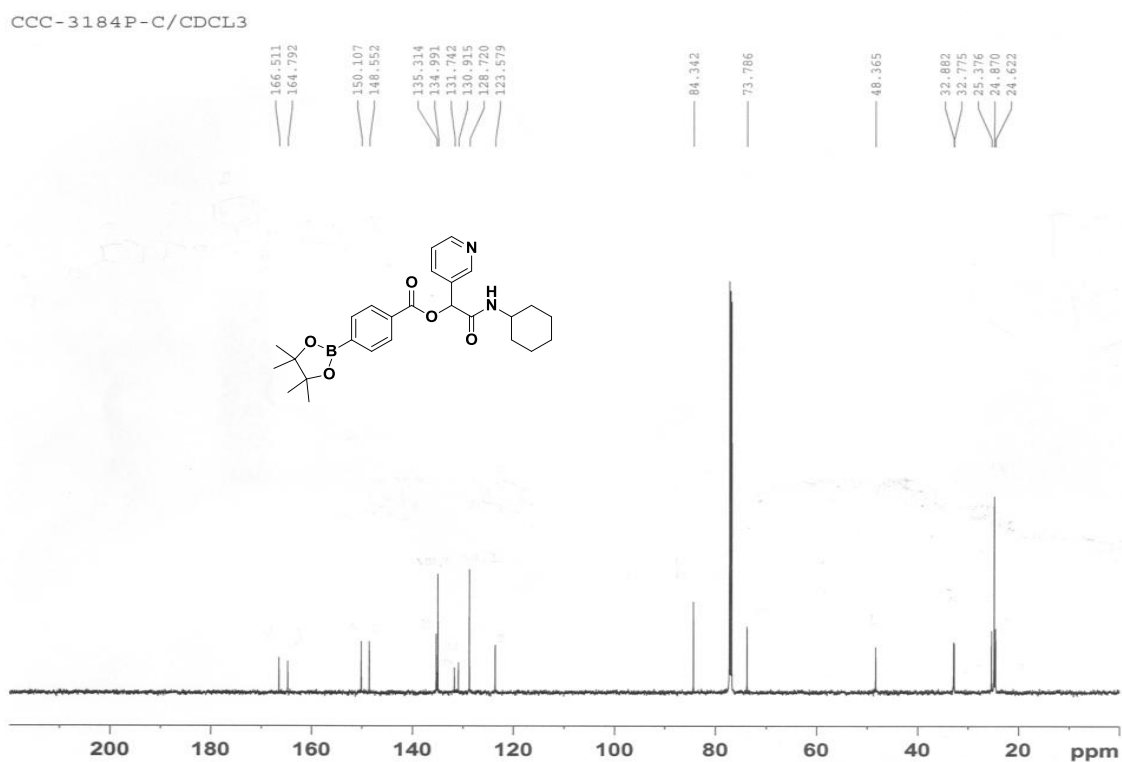**Figure S64.** 600 MHz  $^{11}\text{B}$ -NMR of Compound (A16) in Chloroform-*d*.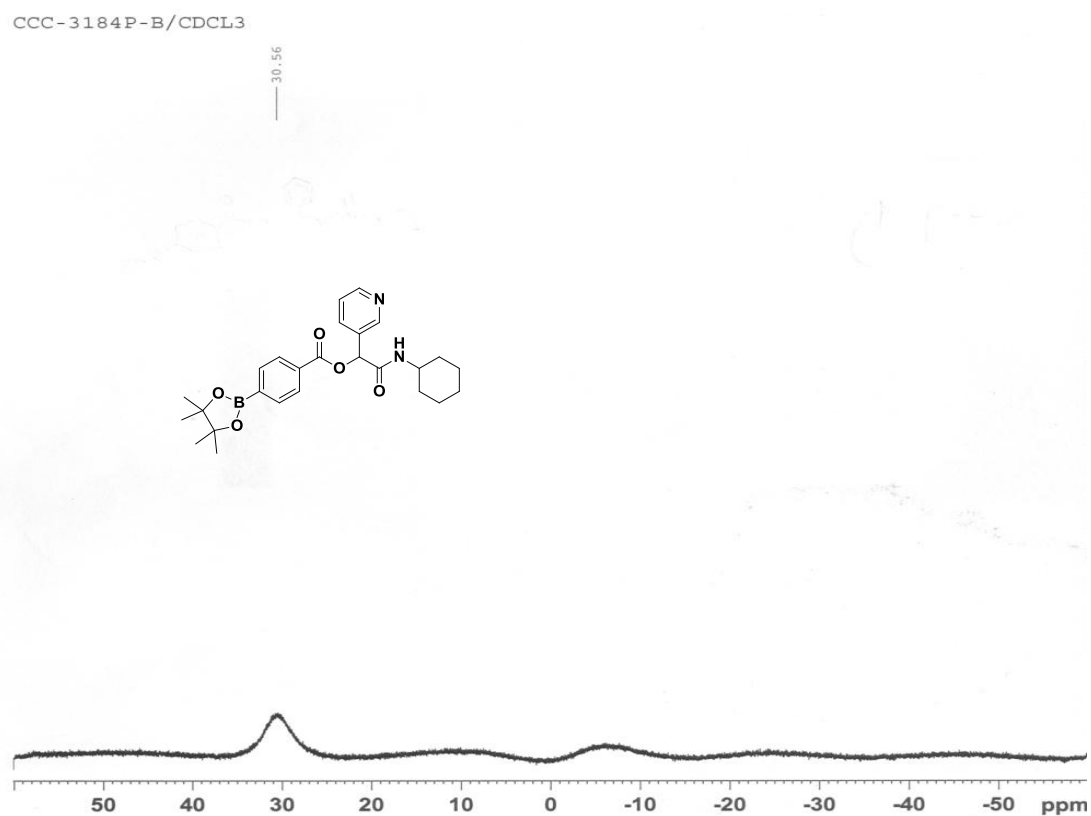



**Figure S65.** HRMS (ESI, positive ion)  $[M+H]^+$  of Compound (A17).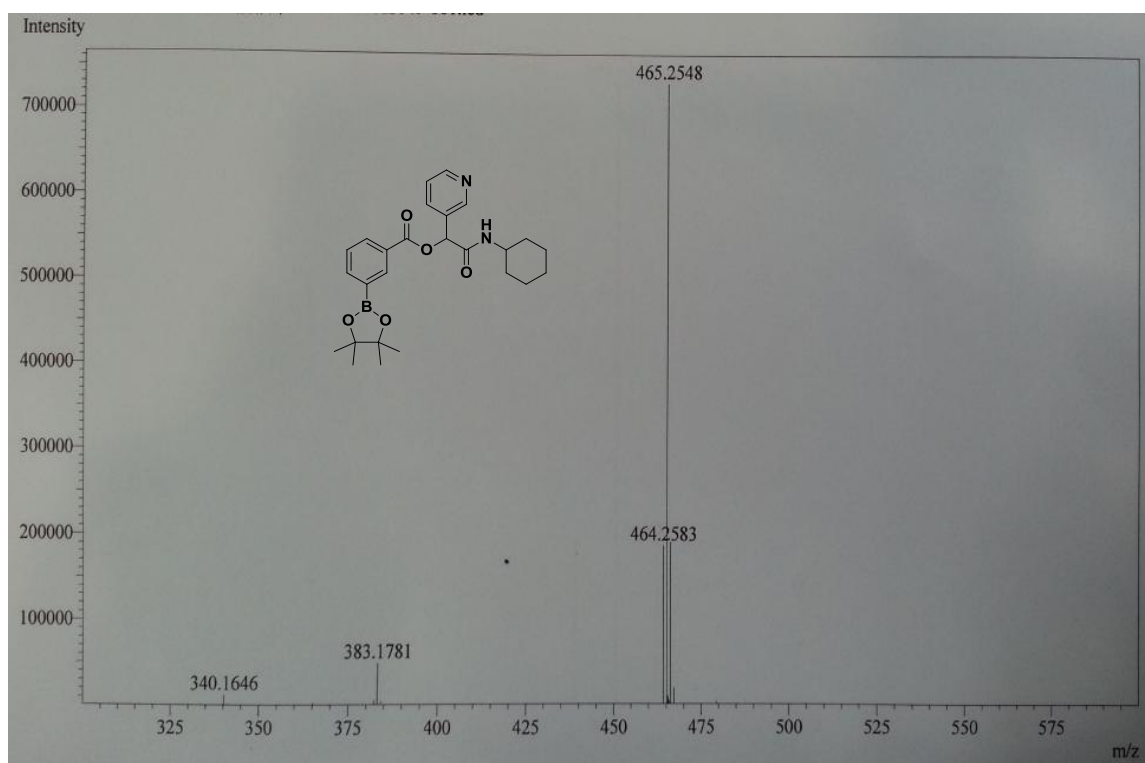**Figure S66.** 600 MHz  $^1\text{H}$ -NMR of Compound (A17) in Chloroform- $d$ .

CCC-4048P2-H/CDC13

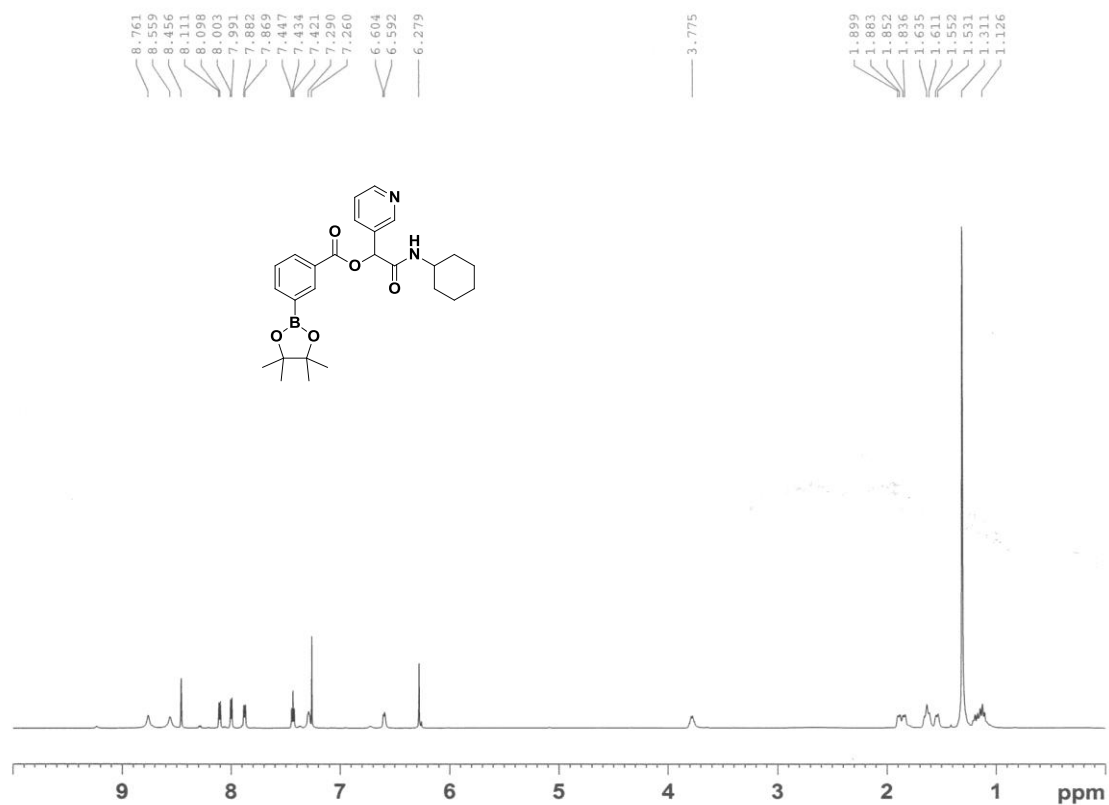

**Figure S67.** 600 MHz  $^{13}\text{C}$ -NMR of Compound (A17) in Chloroform-*d*.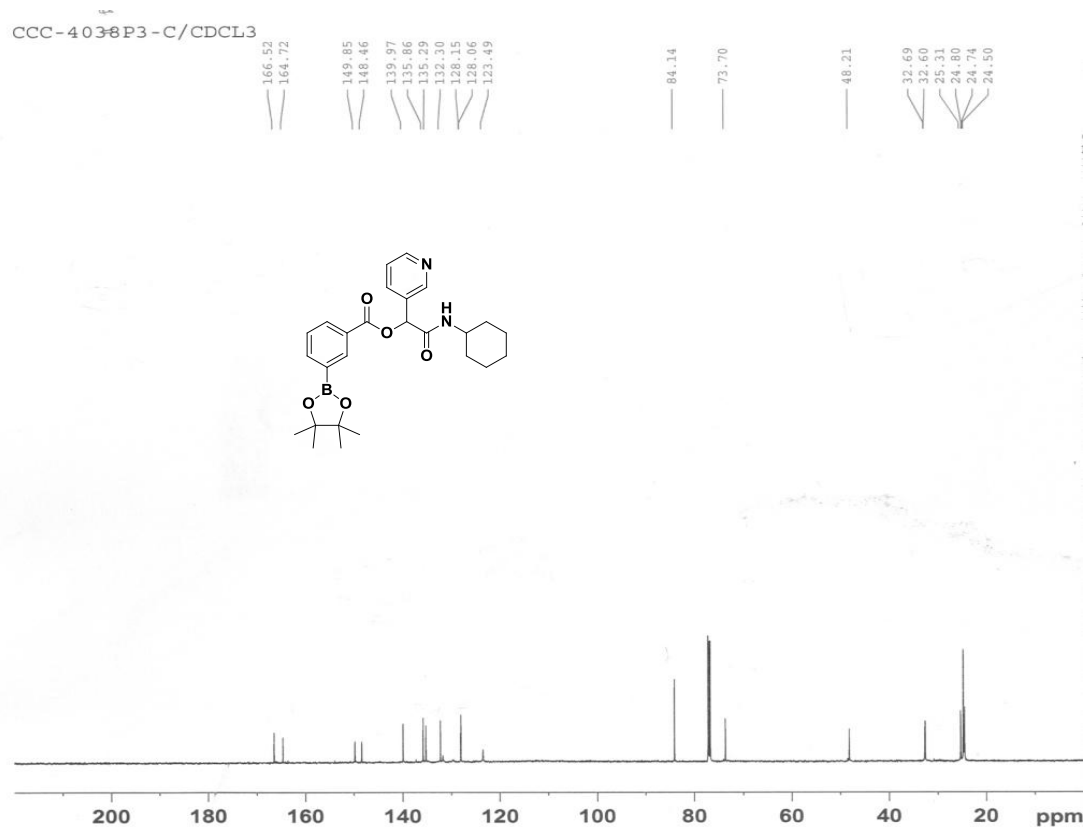**Figure S68.** 600 MHz  $^{11}\text{B}$ -NMR of Compound (A17) in Chloroform-*d*.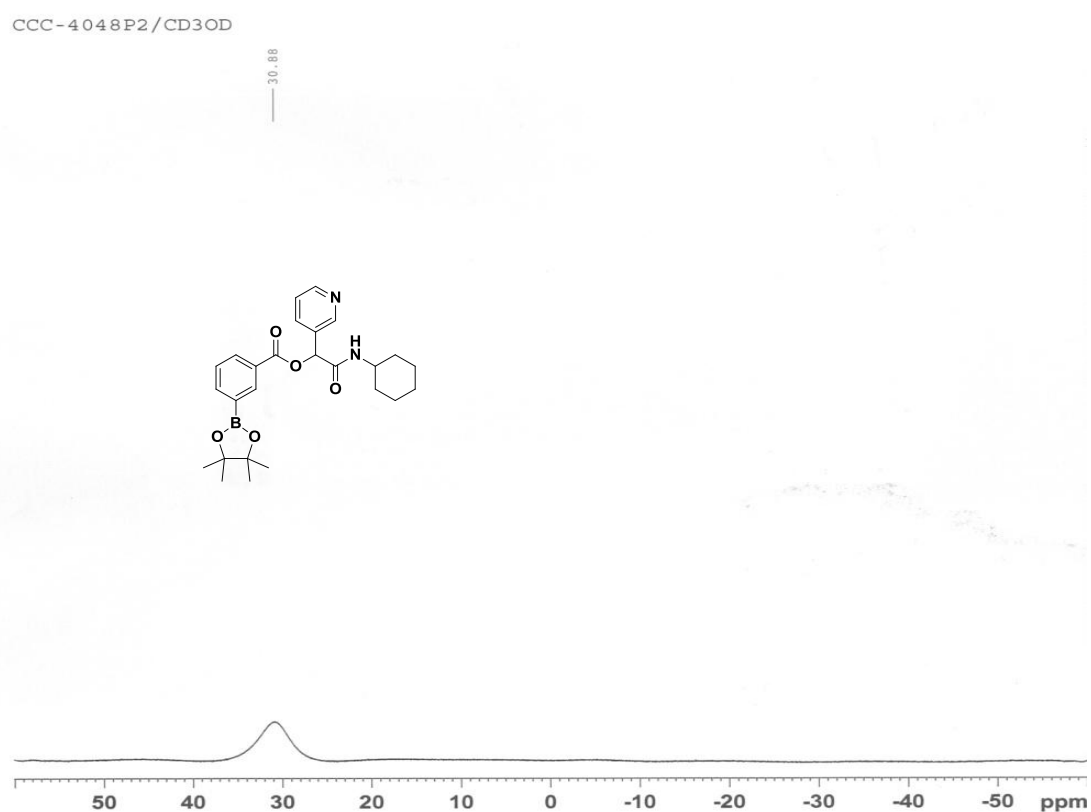

**Figure S69.** HRMS (ESI, positive ion)  $[M+H]^+$  of Compound (A18).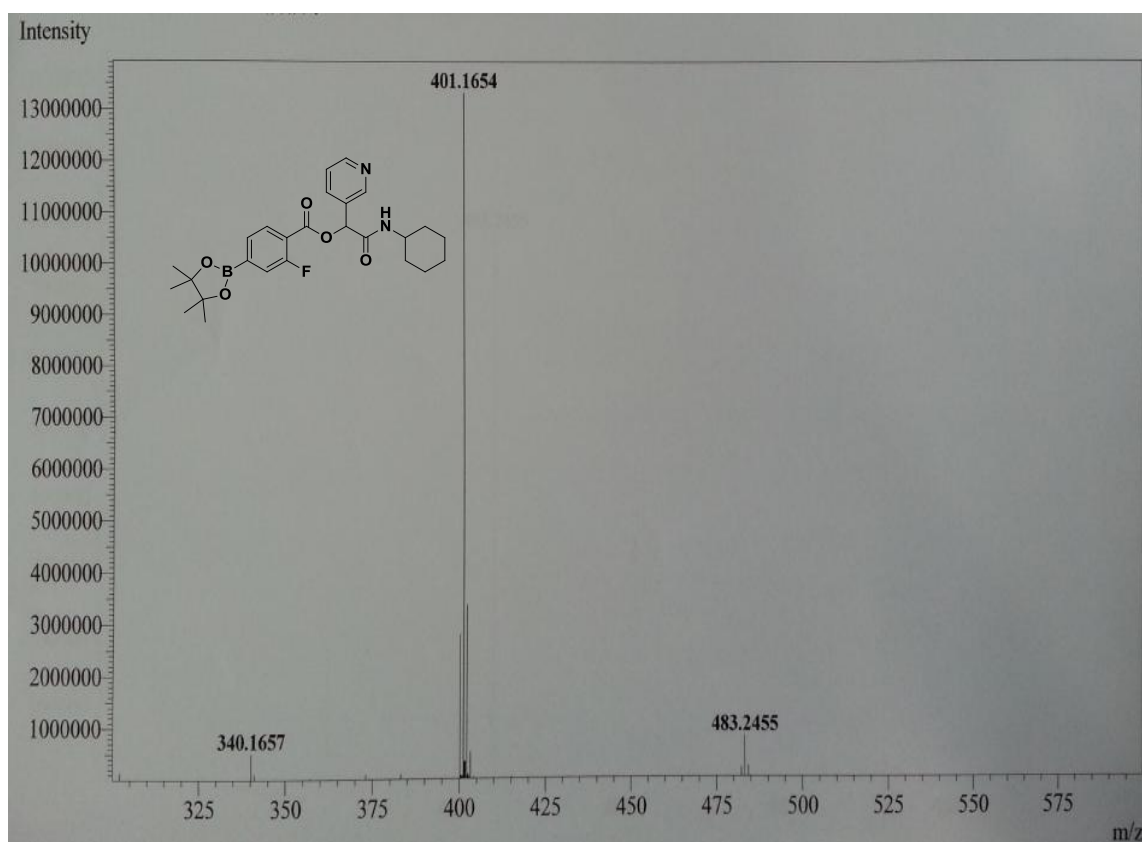**Figure S70.** 600 MHz  $^1\text{H}$ -NMR of Compound (A18) in Chloroform-*d*.CCC-3190P-H/CDCL<sub>3</sub>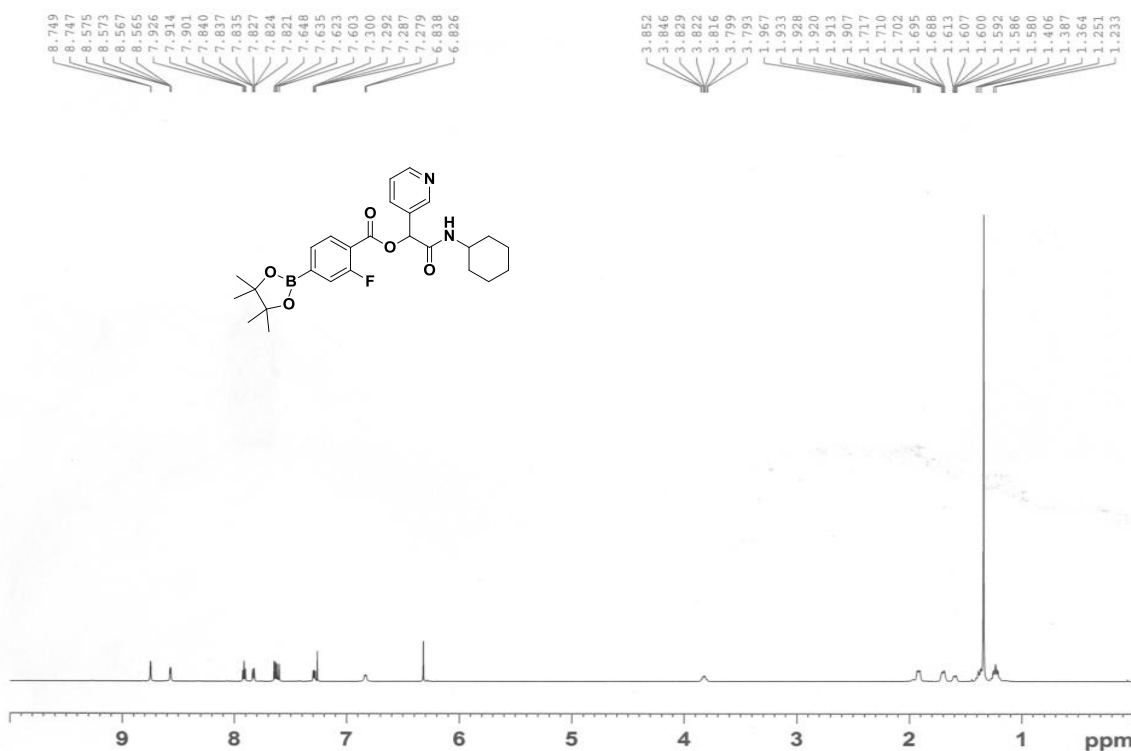

**Figure S71.** 600 MHz  $^{13}\text{C}$ -NMR of Compound (A18) in Chloroform-*d*.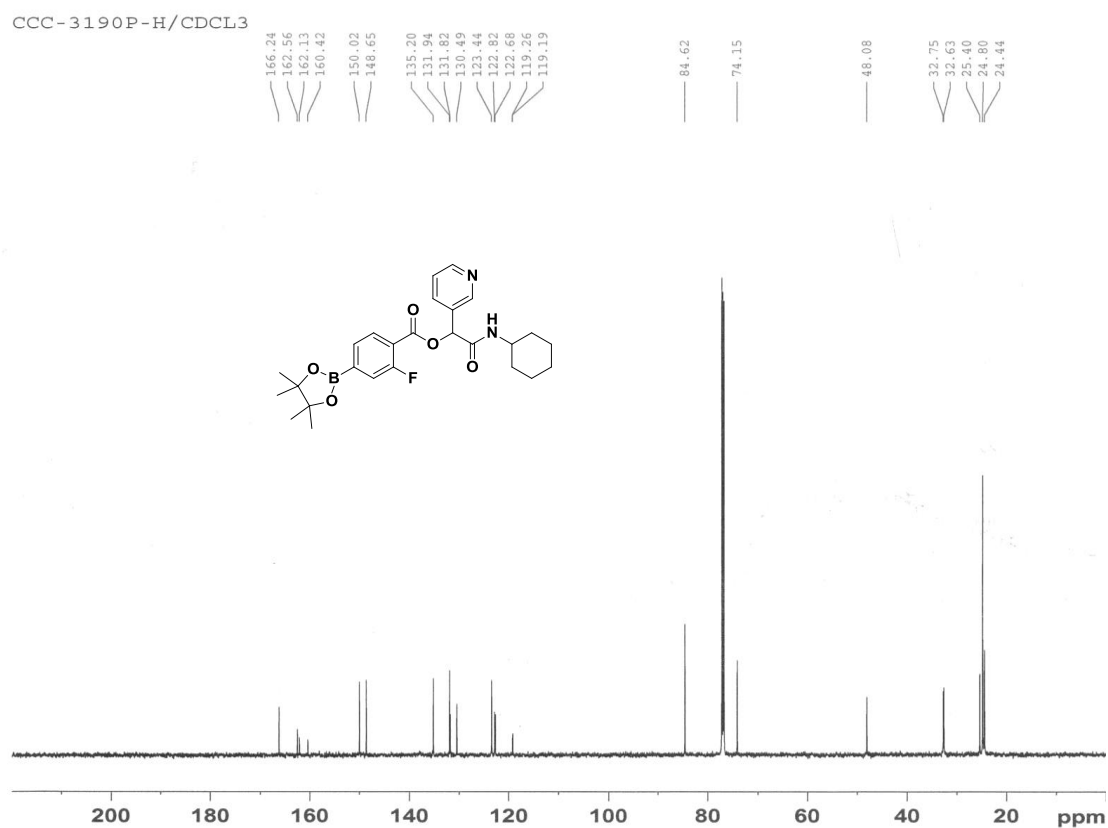**Figure S72.** 600 MHz  $^{11}\text{B}$ -NMR of Compound (A18) in Chloroform-*d*.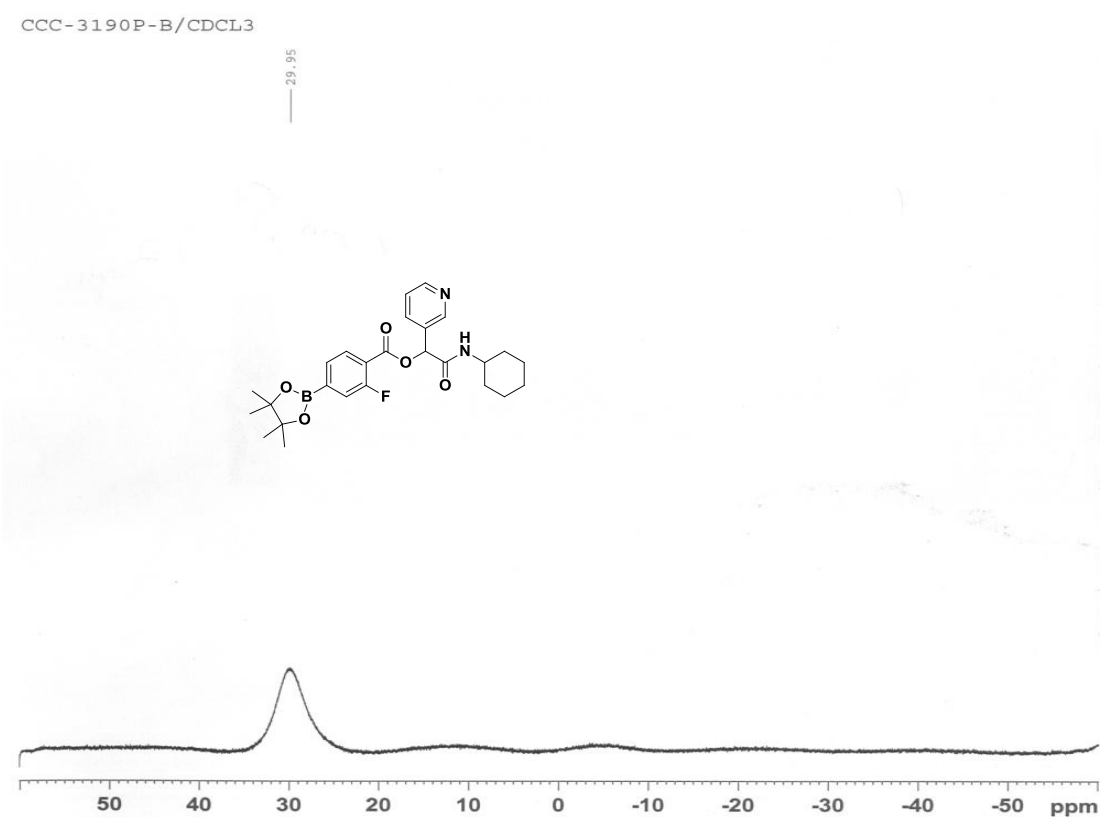

**Figure S73.** HRMS (ESI, positive ion)  $[M+H]^+$  of Compound (A19).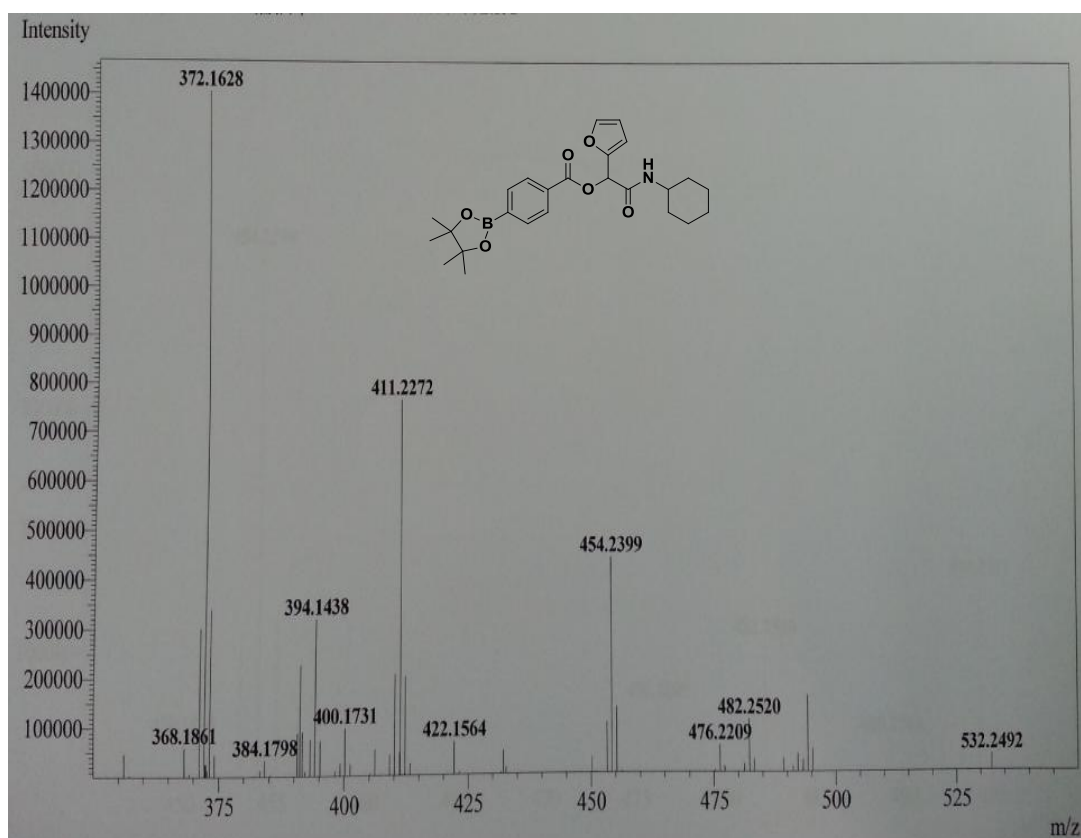**Figure S74.** 600 MHz  $^1\text{H}$ -NMR of Compound (A19) in Chloroform- $d$ .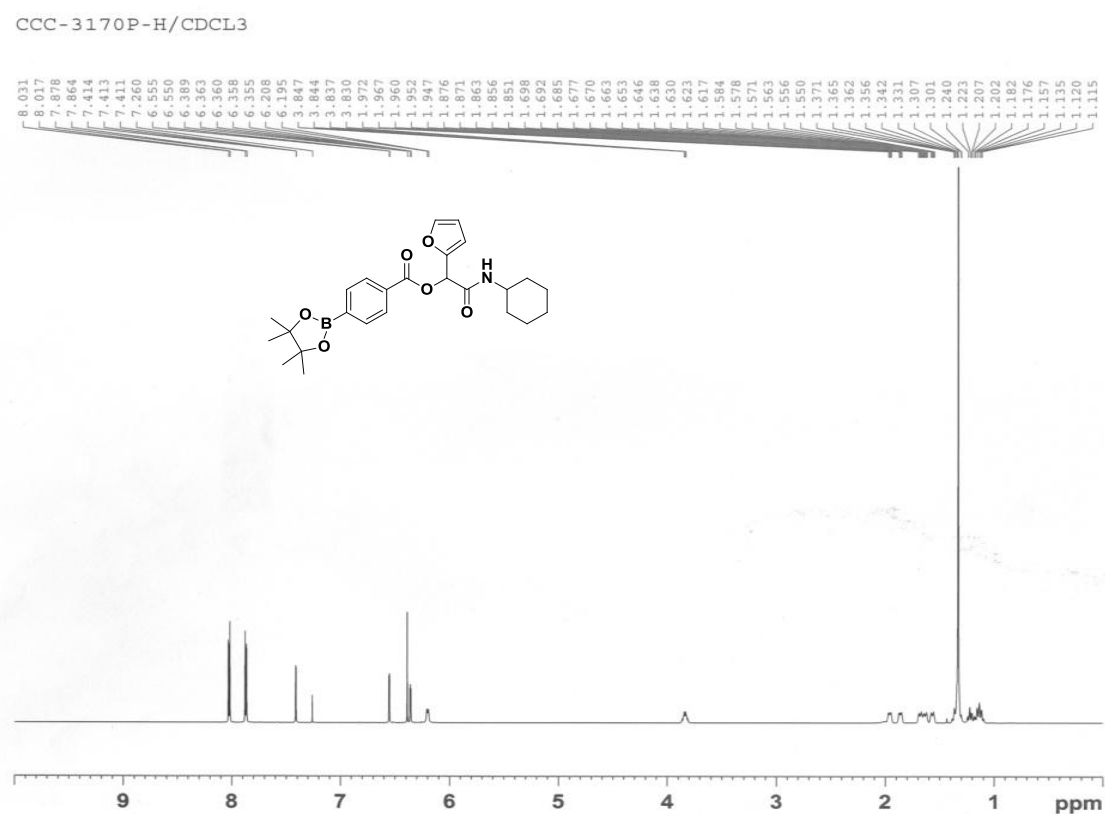

**Figure S75.** 600 MHz  $^{13}\text{C}$ -NMR of Compound (A19) in Chloroform-*d*.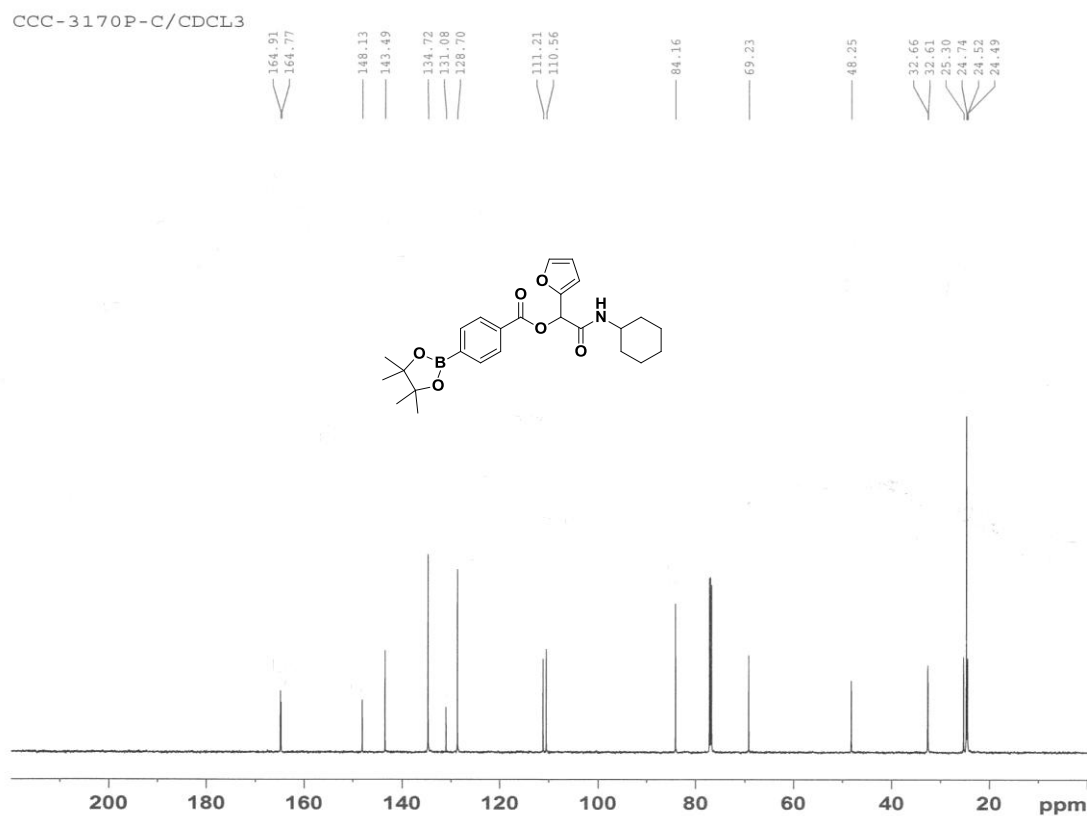**Figure S76.** 600 MHz  $^{11}\text{B}$ -NMR of Compound (A19) in Chloroform-*d*.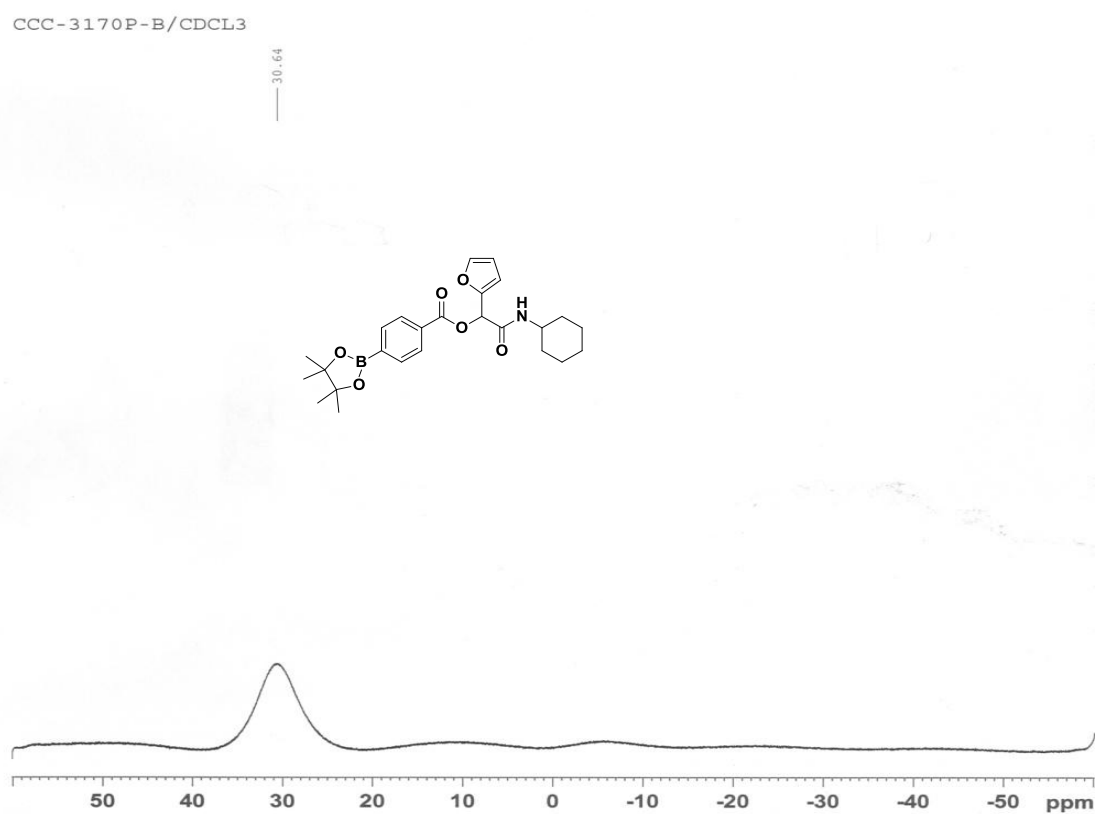

**Figure S77.** HRMS (ESI, positive ion)  $[M+H]^+$  of Compound (A20).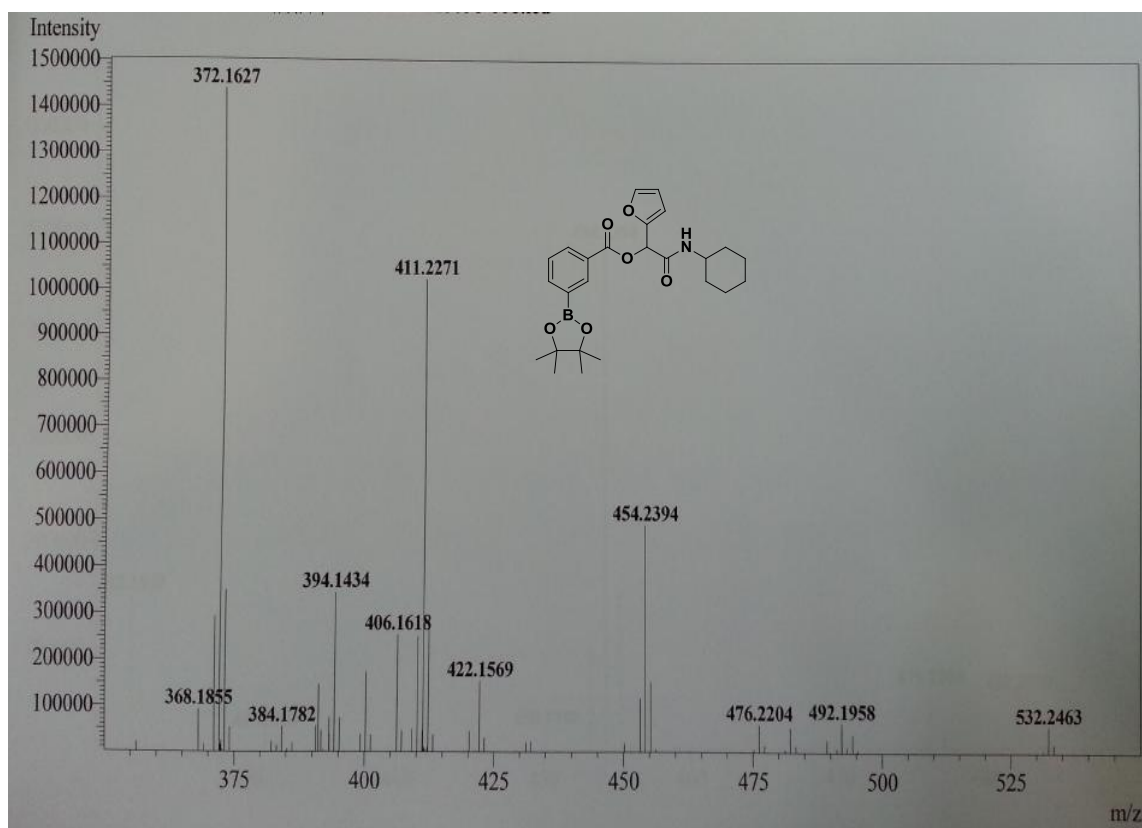**Figure S78.** 600 MHz  $^1\text{H}$ -NMR of Compound (A20) in Chloroform- $d$ .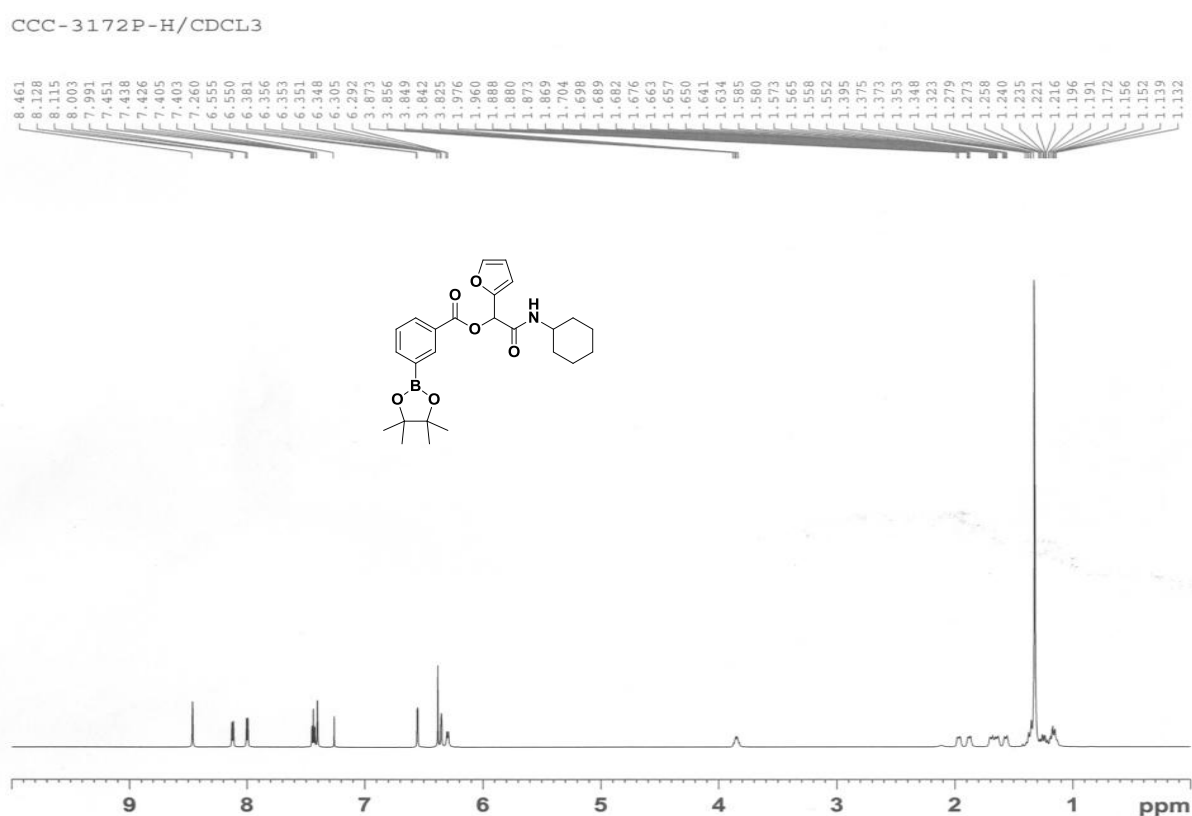

**Figure S79.** 600 MHz  $^{13}\text{C}$ -NMR of Compound (A20) in Chloroform-*d*.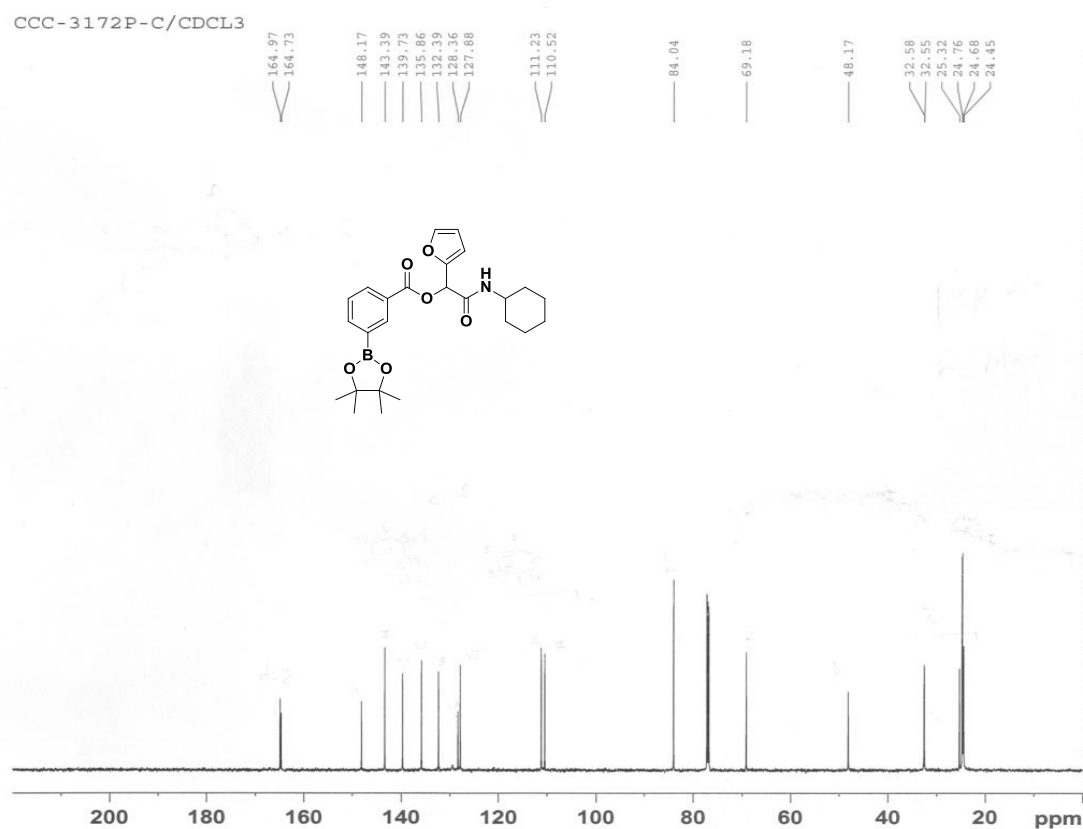**Figure S80.** 600 MHz  $^{11}\text{B}$ -NMR of Compound (A20) in Chloroform-*d*.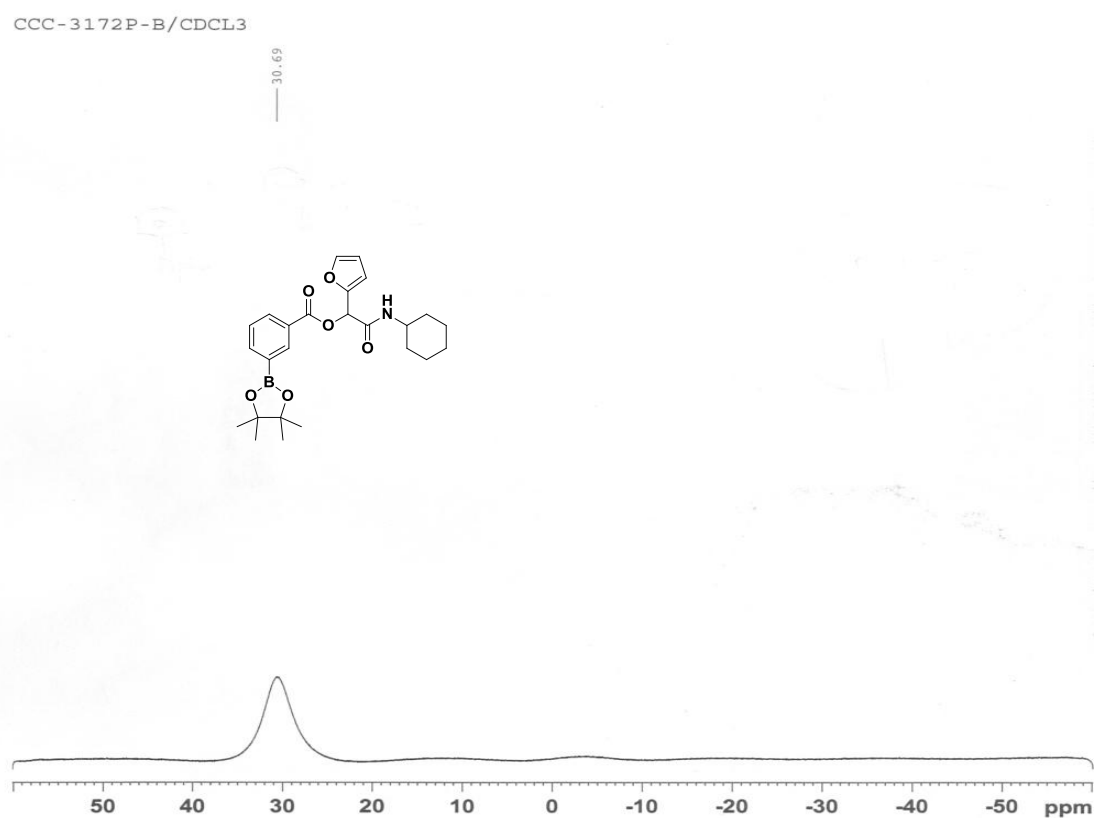



**Figure S80.** 600 MHz  $^{11}\text{B}$ -NMR of Compound (A20) in Chloroform-*d*.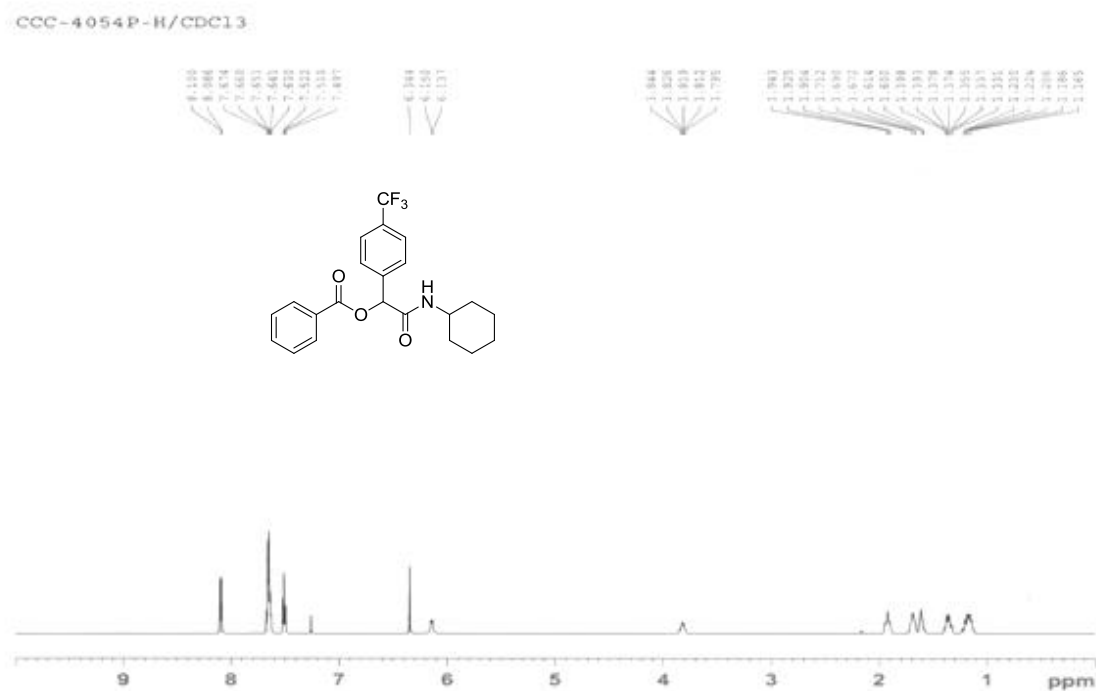**Figure S82.** 600 MHz  $^{13}\text{C}$ -NMR of Compound (A21) in Chloroform-*d*.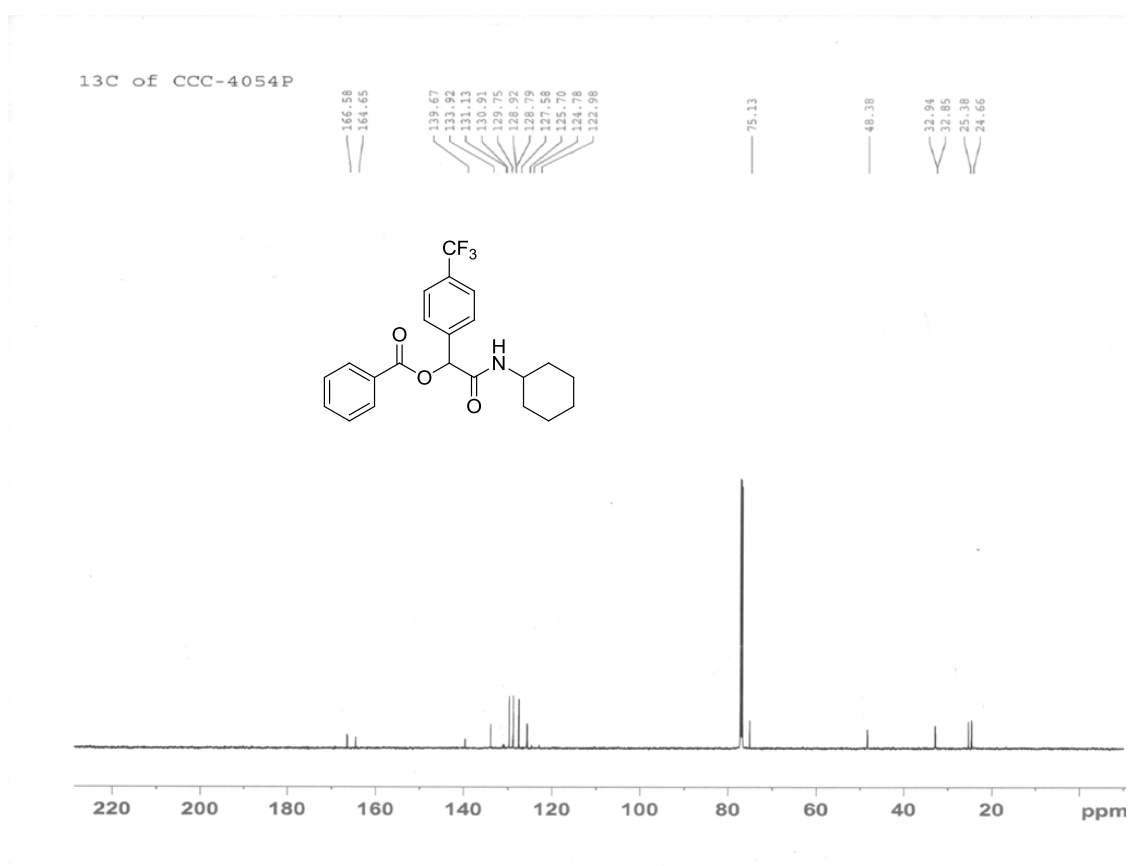

**Figure S83.** HRMS (ESI, positive ion)  $[M+H]^+$  of Compound (B1).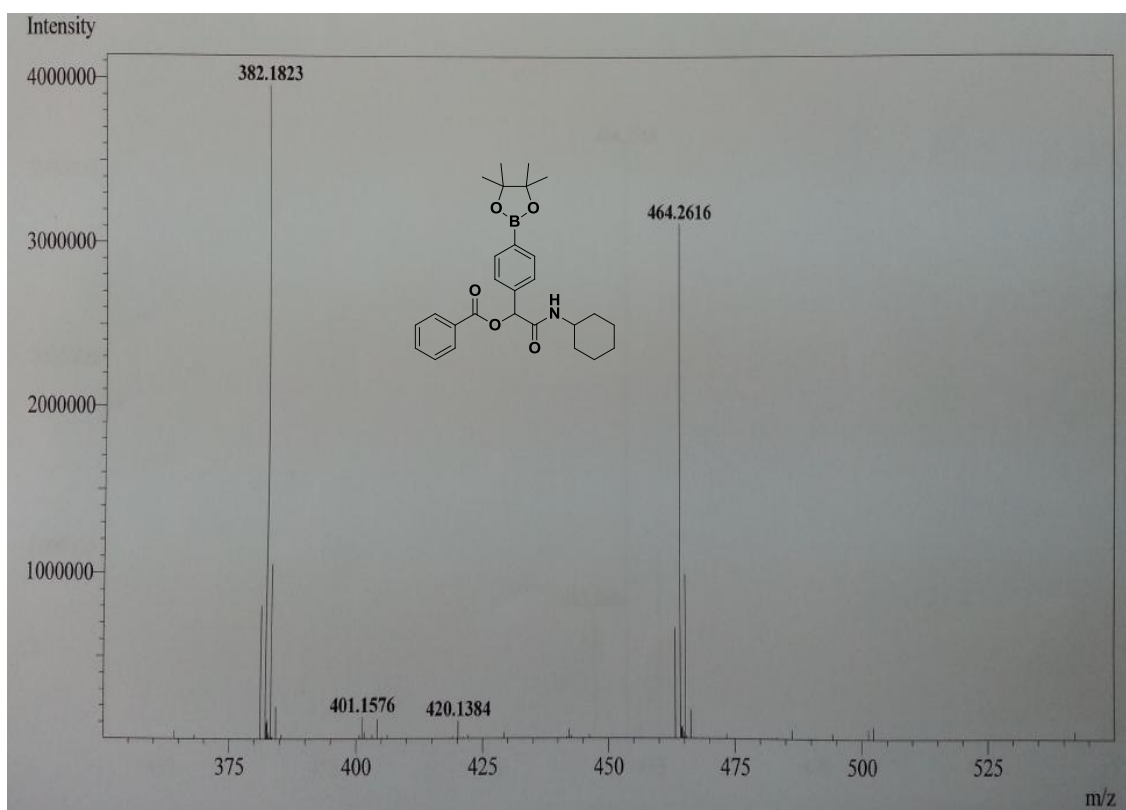**Figure S84.** 600 MHz  $^1\text{H}$ -NMR of Compound (B1) in Chloroform- $d$ .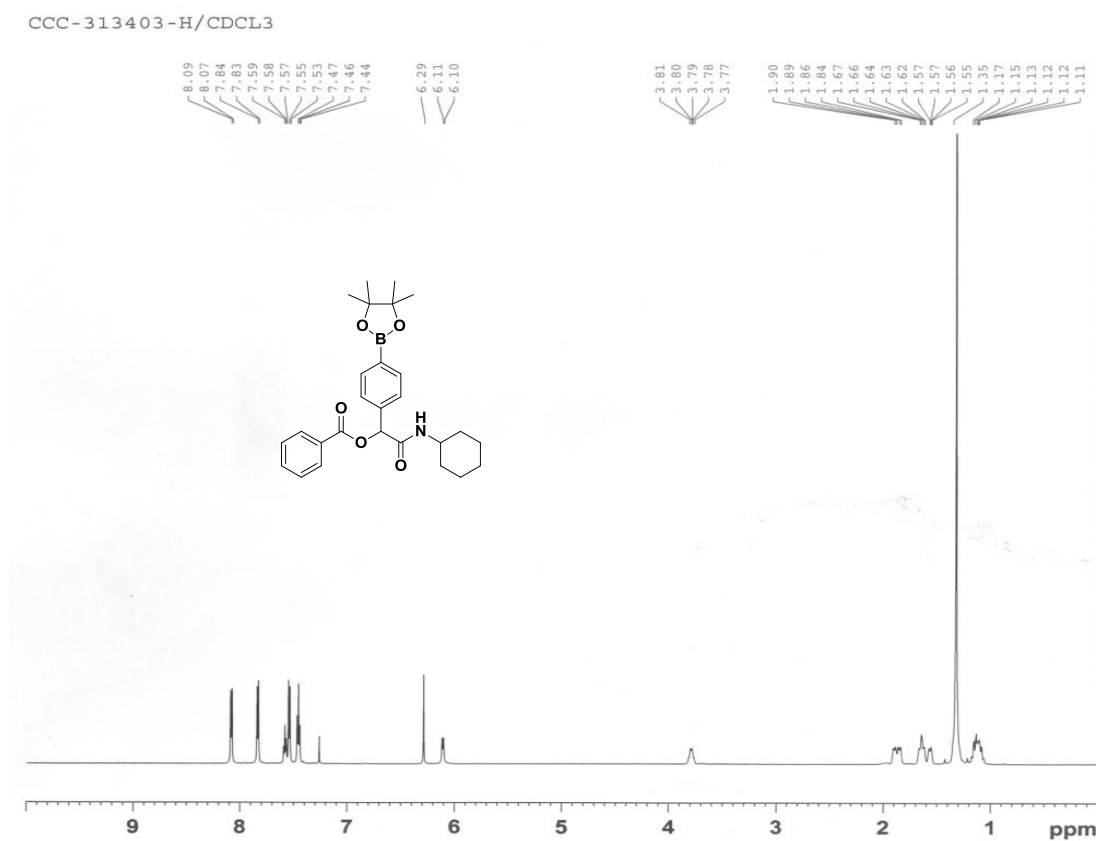

**Figure S85.** 600 MHz  $^{13}\text{C}$ -NMR of Compound (B1) in Chloroform-*d*.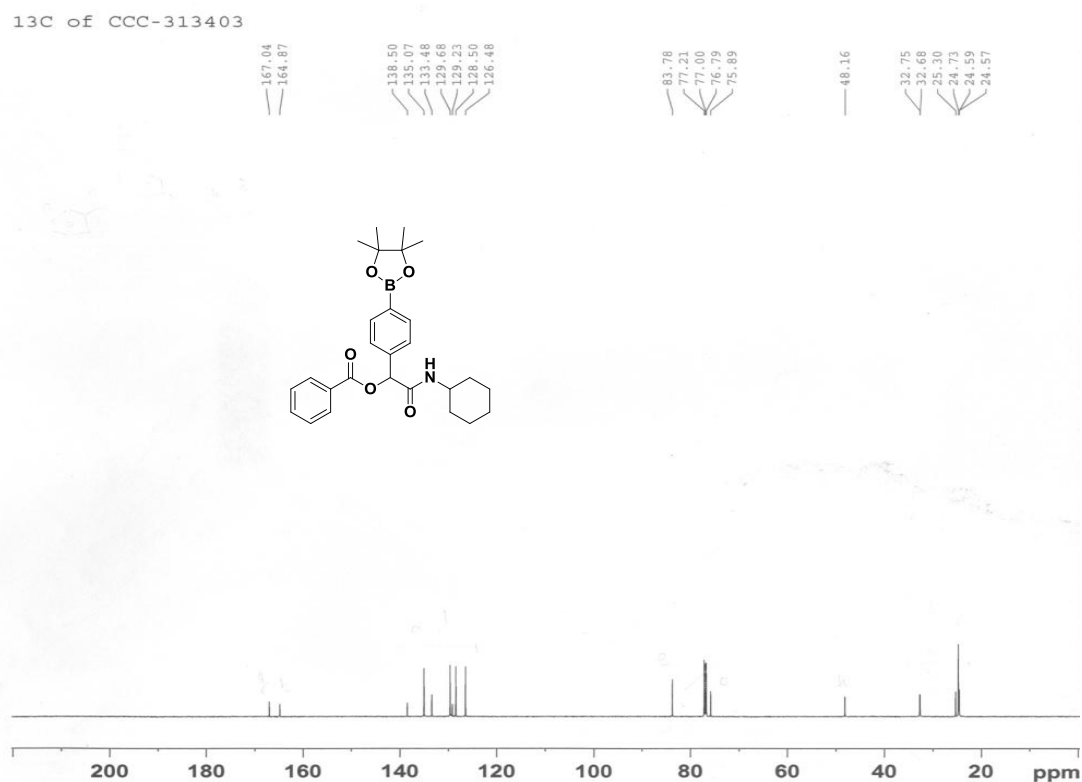**Figure S86.** 600 MHz  $^{11}\text{B}$ -NMR of Compound (B1) in Chloroform-*d*.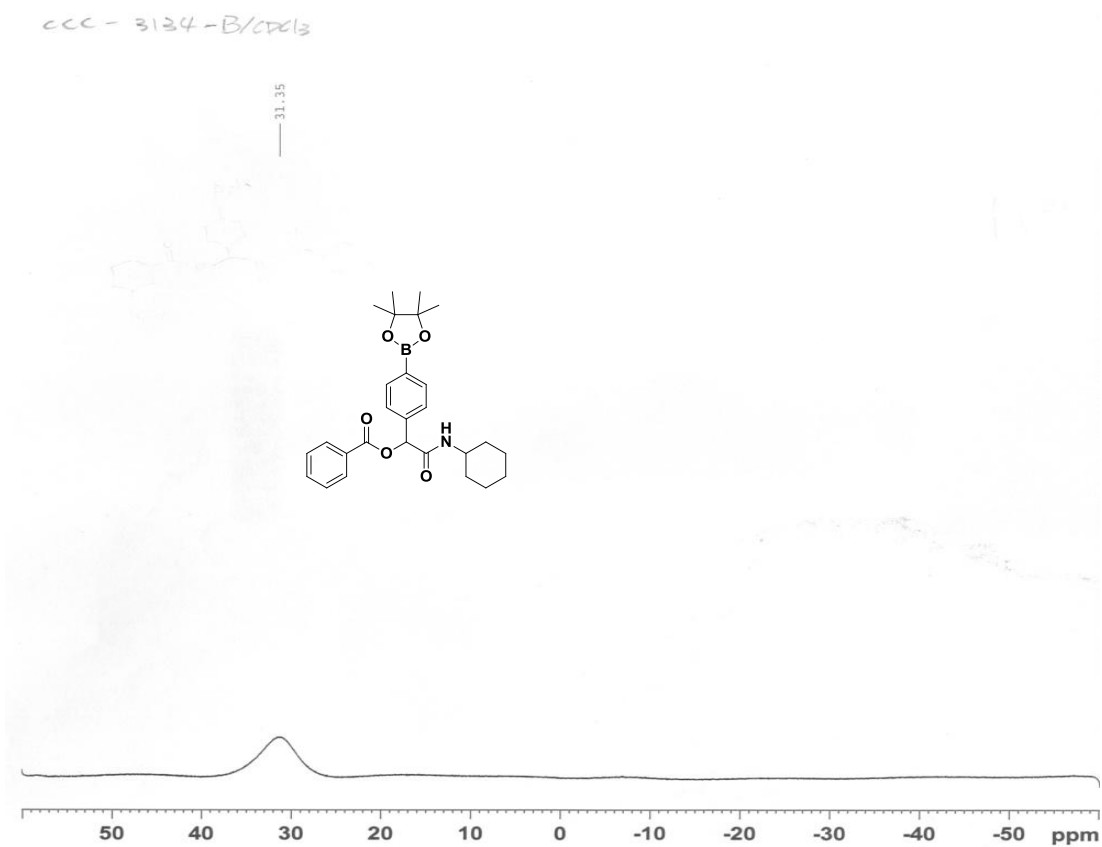

**Figure S87.** HRMS (ESI, positive ion)  $[M+H]^+$  of Compound (**B2**).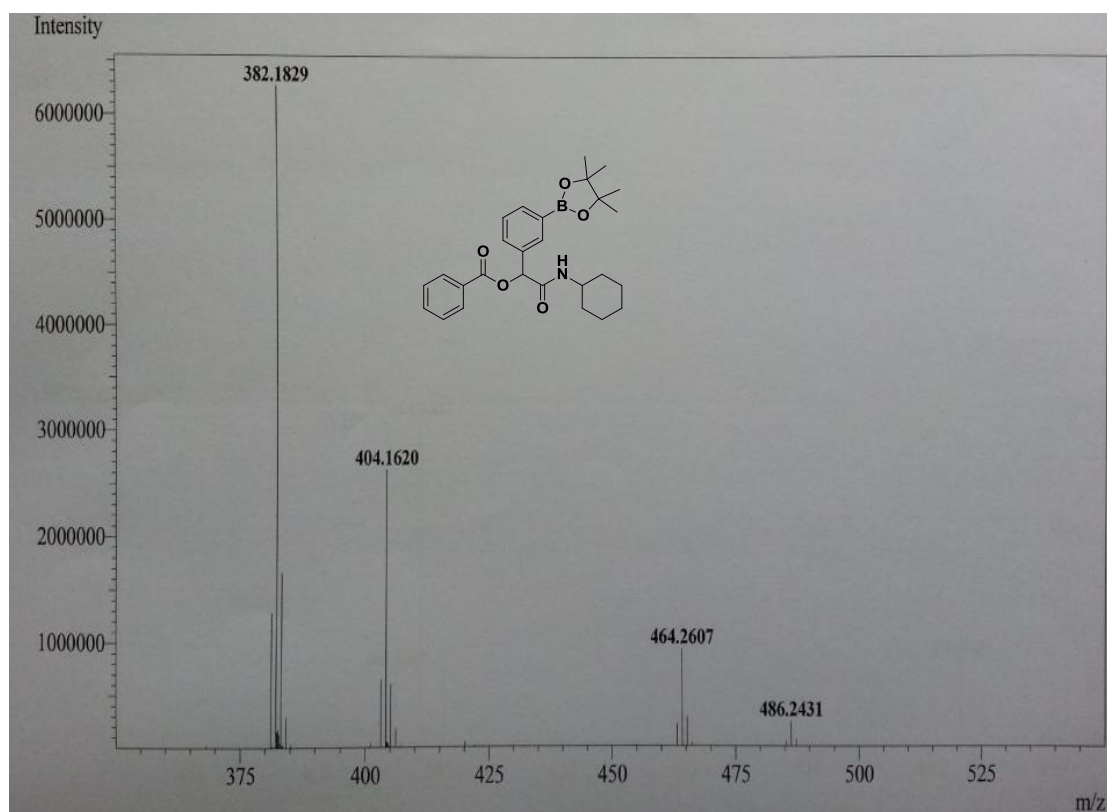**Figure S88.** 600 MHz  $^1\text{H}$ -NMR of Compound (**B2**) in Chloroform-*d*.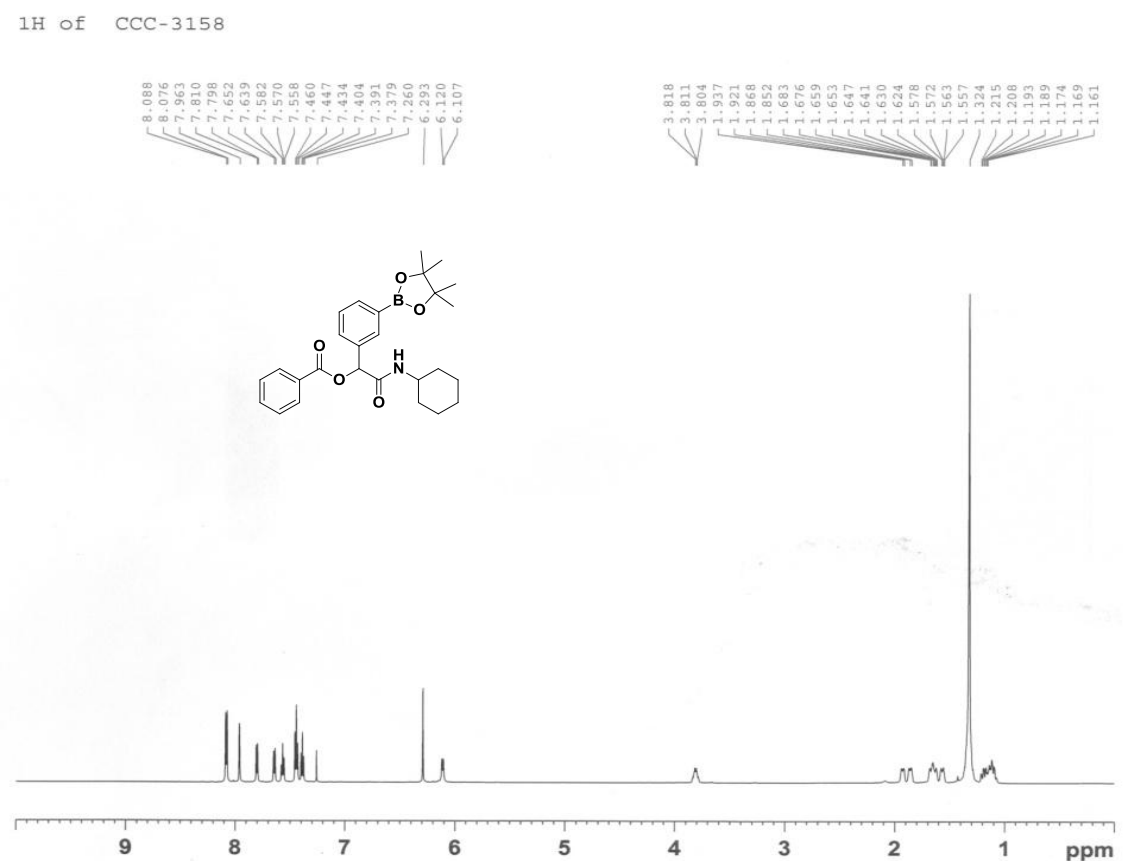

**Figure S89.** 600 MHz  $^{13}\text{C}$ -NMR of Compound (B2) in Chloroform-*d*.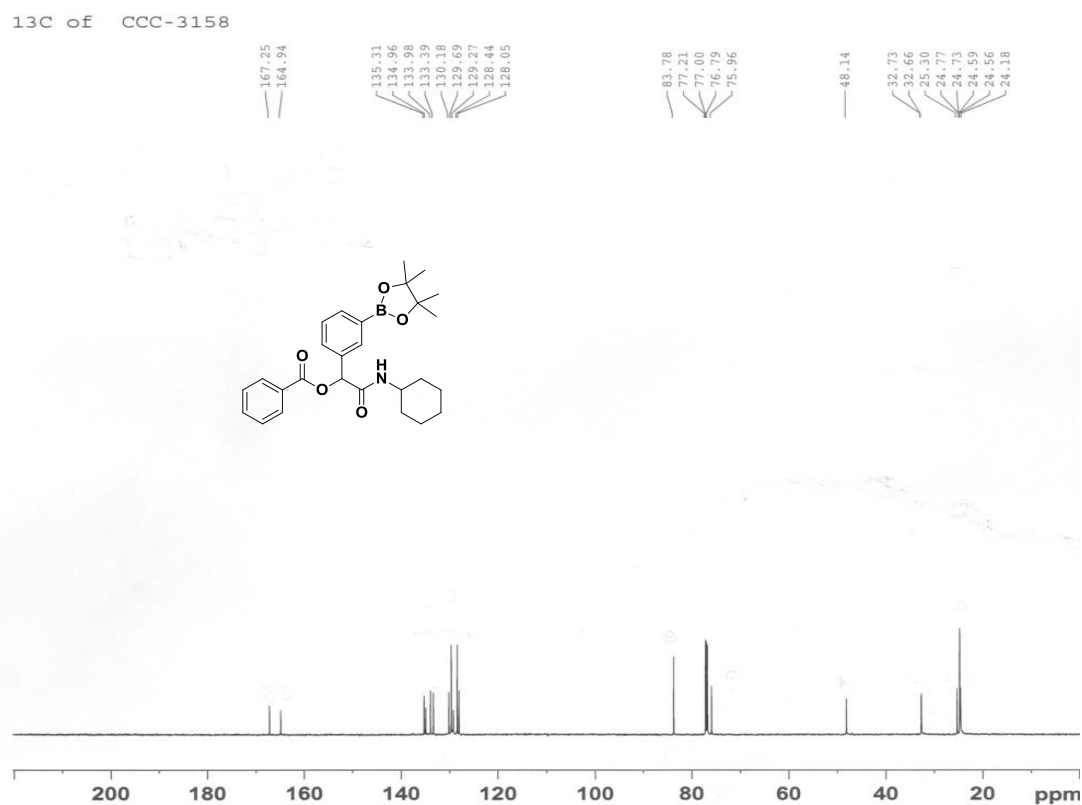**Figure S90.** 600 MHz  $^{11}\text{B}$ -NMR of Compound (B2) in Chloroform-*d*.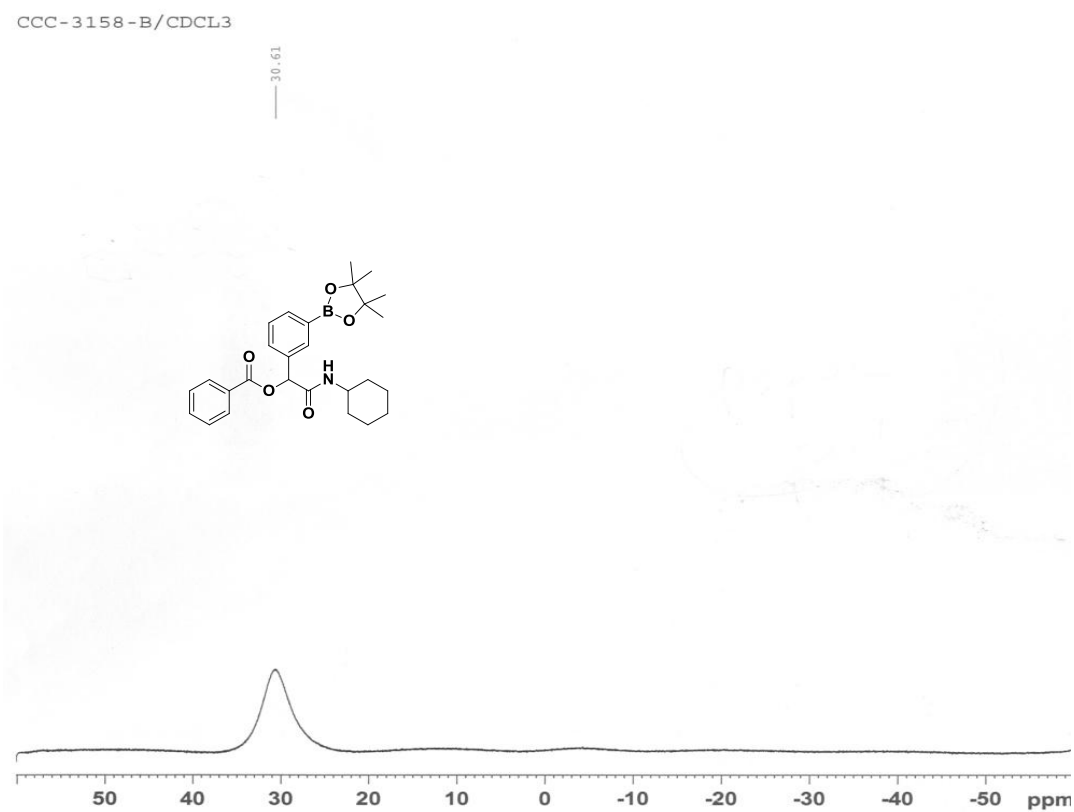

**Figure S91.** HRMS (ESI, positive ion)  $[M+H]^+$  of Compound (**B3**).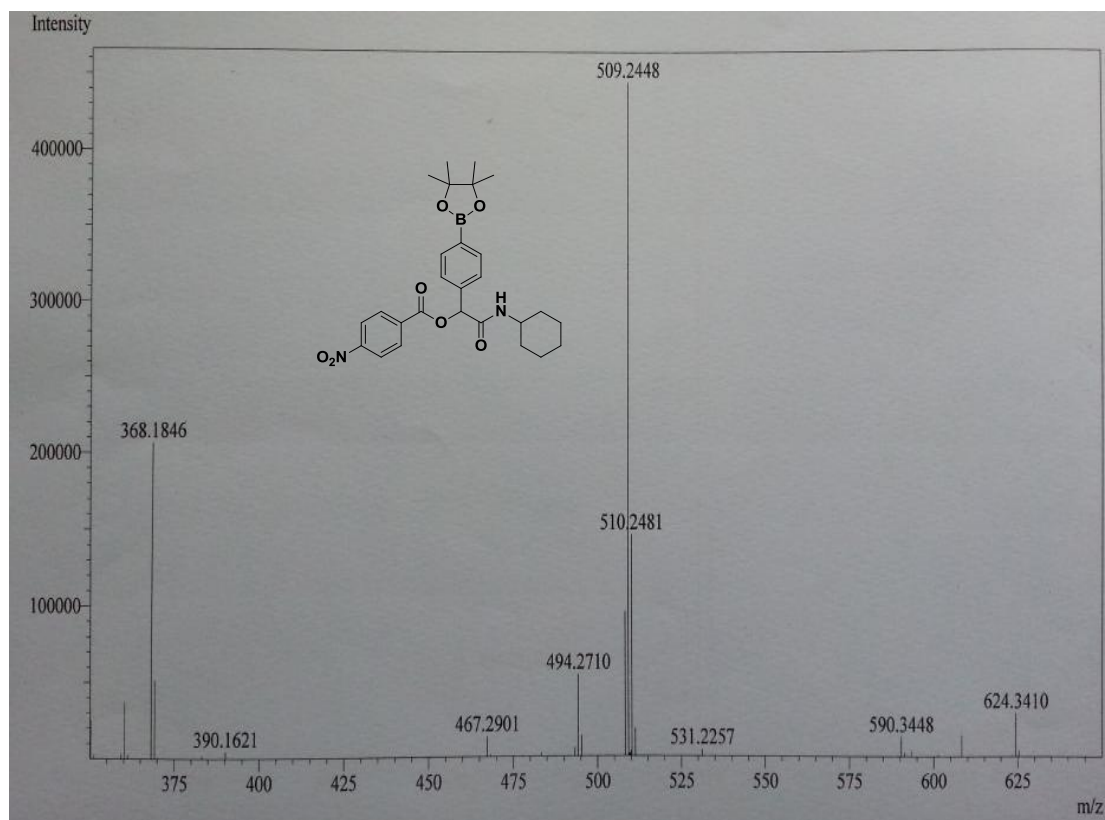**Figure S92.** 600 MHz  $^1\text{H}$ -NMR of Compound (**B3**) in Chloroform-*d*.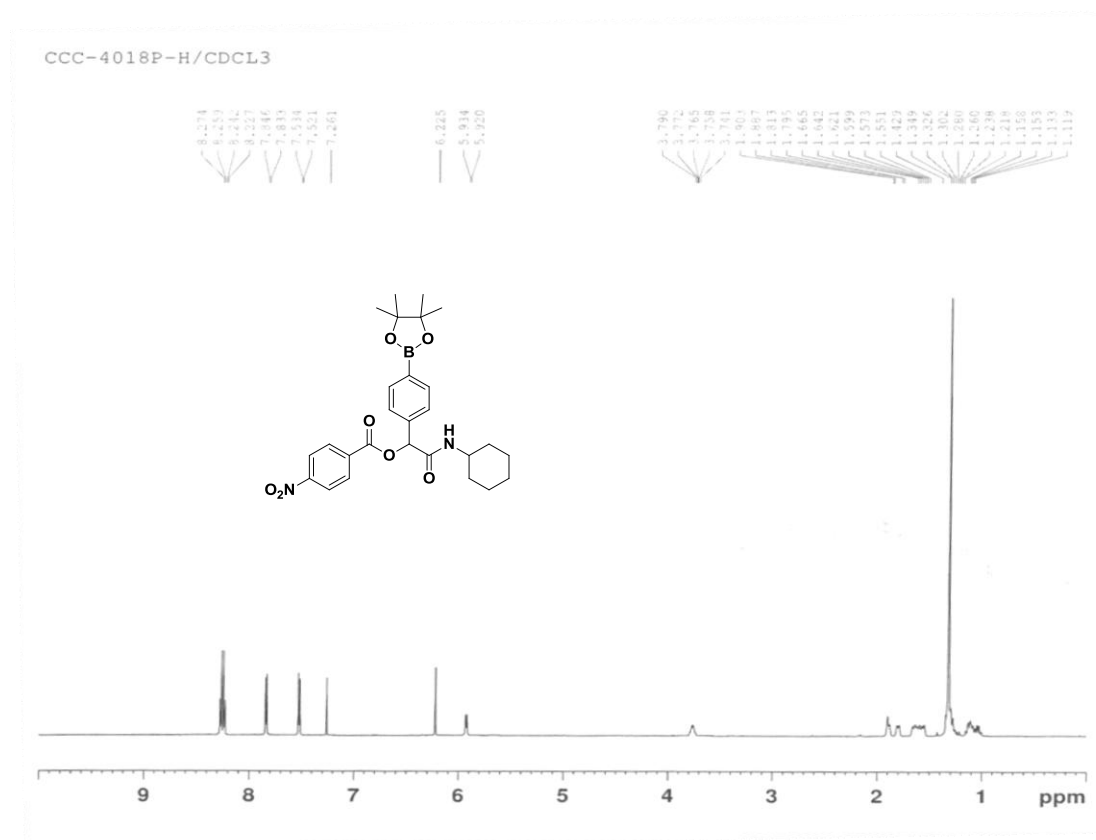

**Figure S93.** 600 MHz  $^{13}\text{C}$ -NMR of Compound (**B3**) in Chloroform-*d*.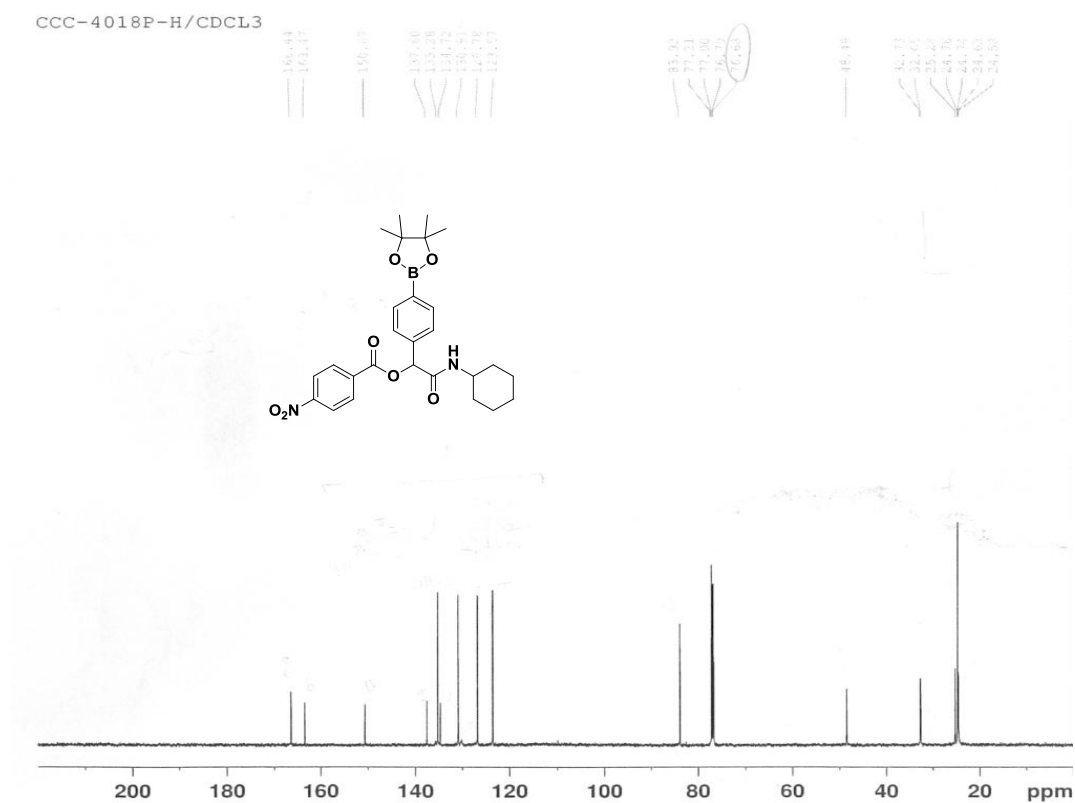**Figure S94.** 600 MHz  $^{11}\text{B}$ -NMR of Compound (**B3**) in Chloroform-*d*.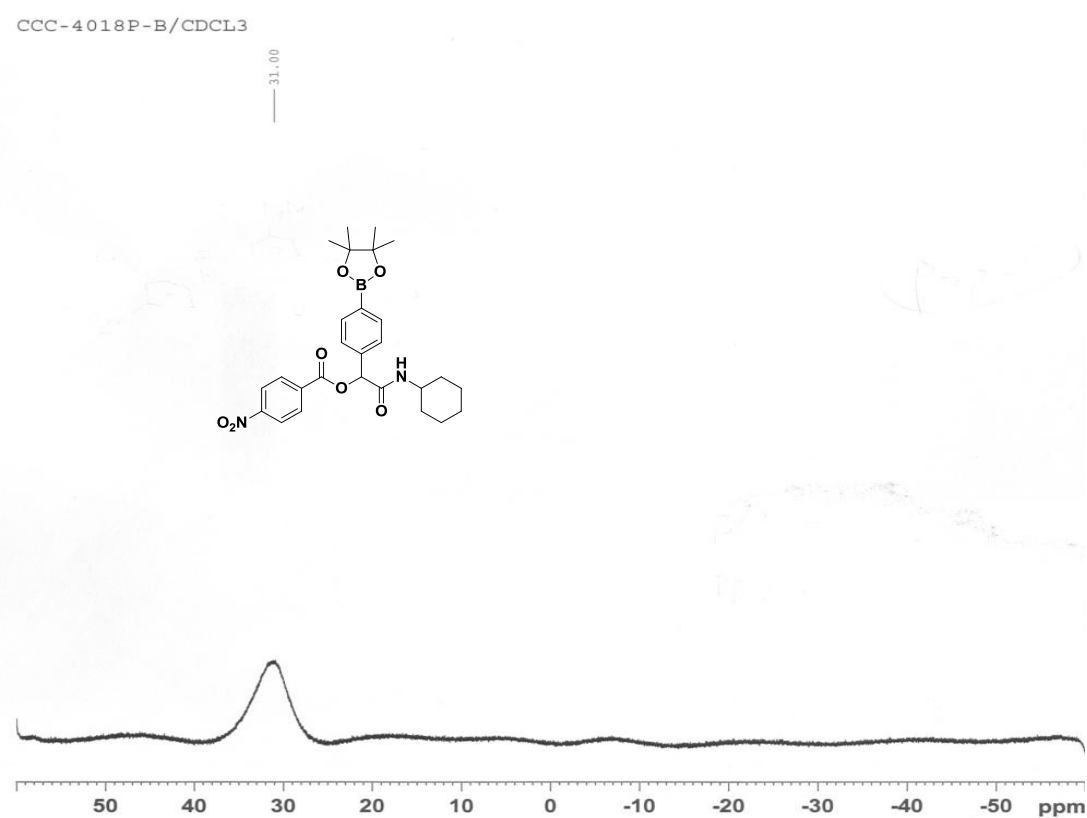

**Figure S95.** HRMS (ESI, positive ion)  $[M+H]^+$  of Compound (**B4**).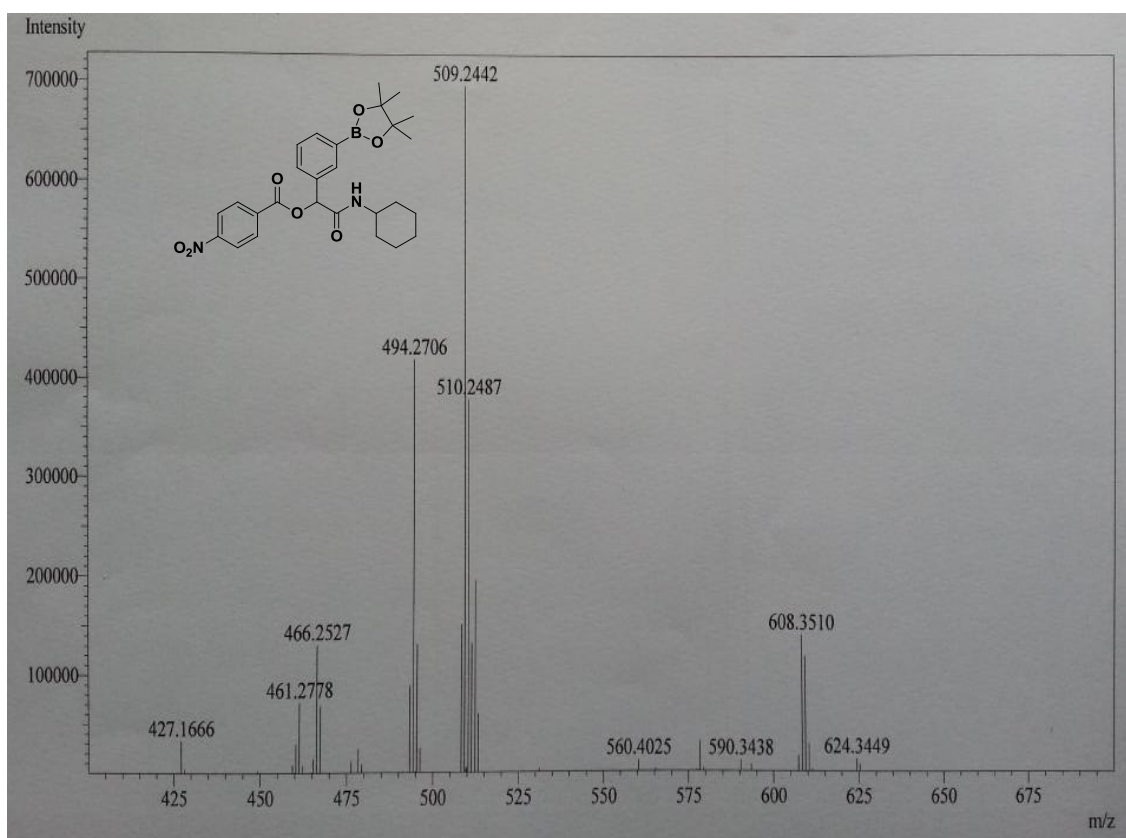**Figure S96.** 600 MHz  $^1\text{H}$ -NMR of Compound (**B4**) in Chloroform-*d*.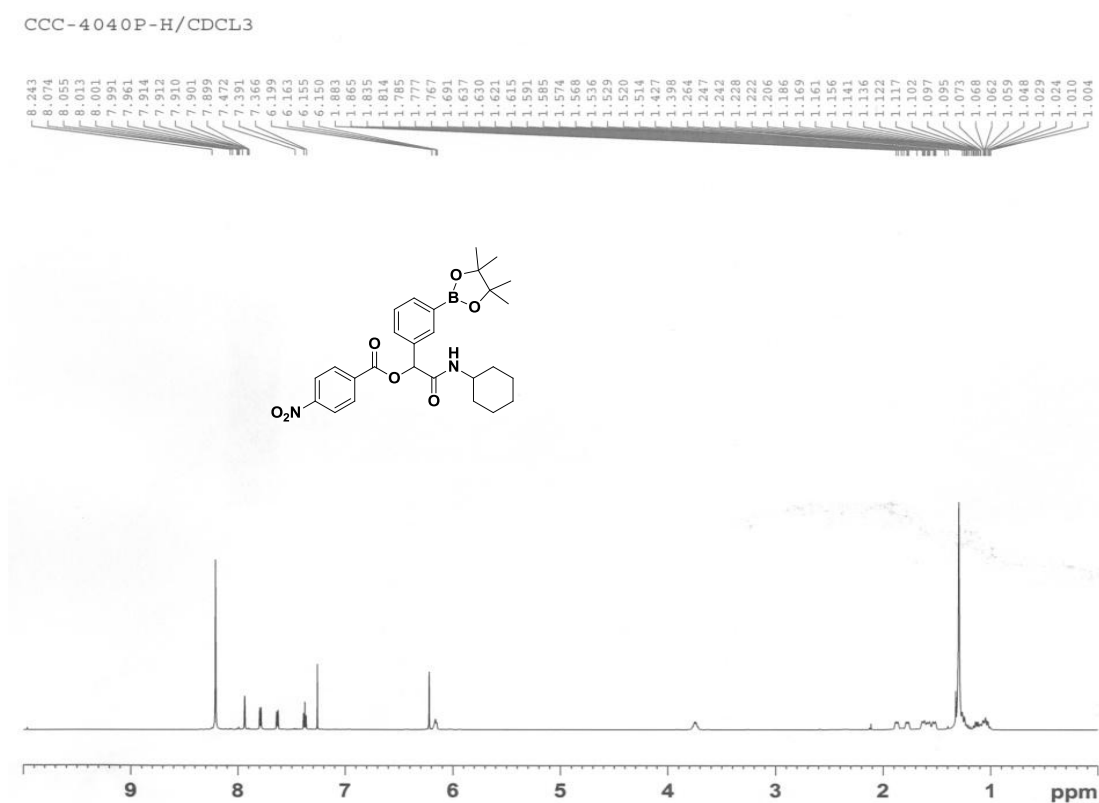



**Figure S97.** 600 MHz  $^{13}\text{C}$ -NMR of Compound (**B4**) in Chloroform-*d*.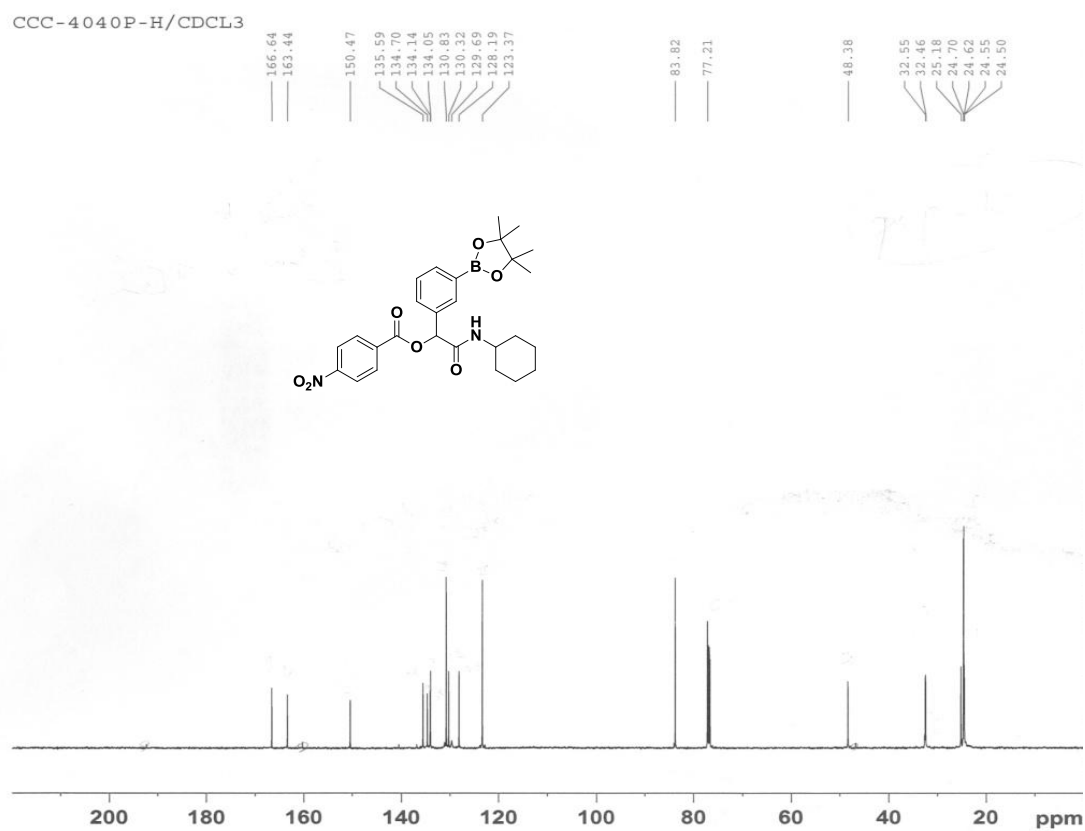**Figure S98.** 600 MHz  $^{11}\text{B}$ -NMR of Compound (**B4**) in Chloroform-*d*.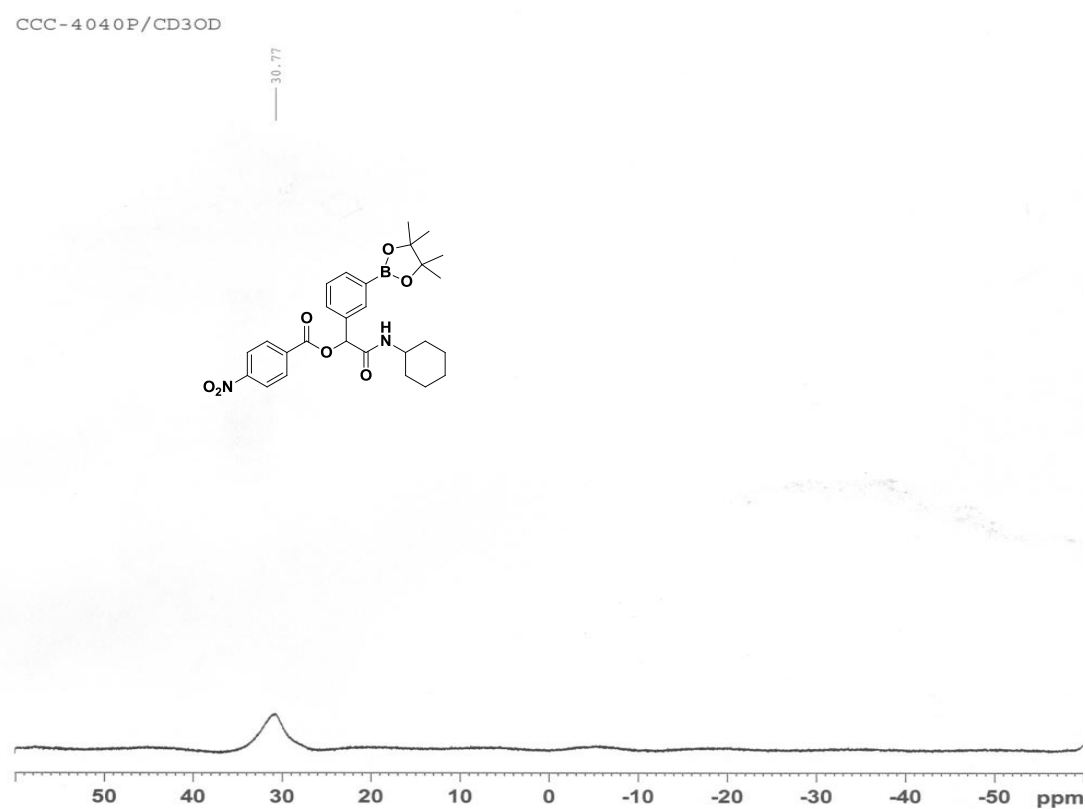

**Figure S99.** HRMS (ESI, positive ion)  $[M+H]^+$  of Compound (**B5**).

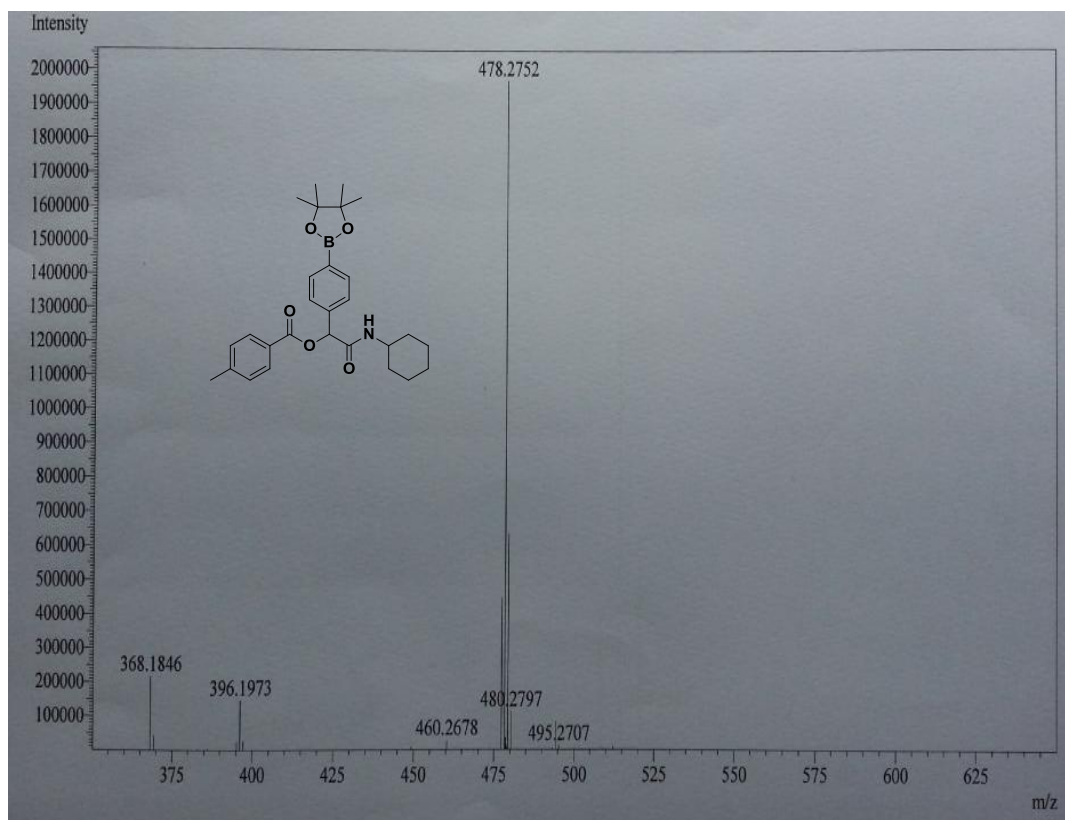

**Figure S100.** 600 MHz  $^1\text{H}$ -NMR of Compound (**B5**) in Chloroform- $d$ .

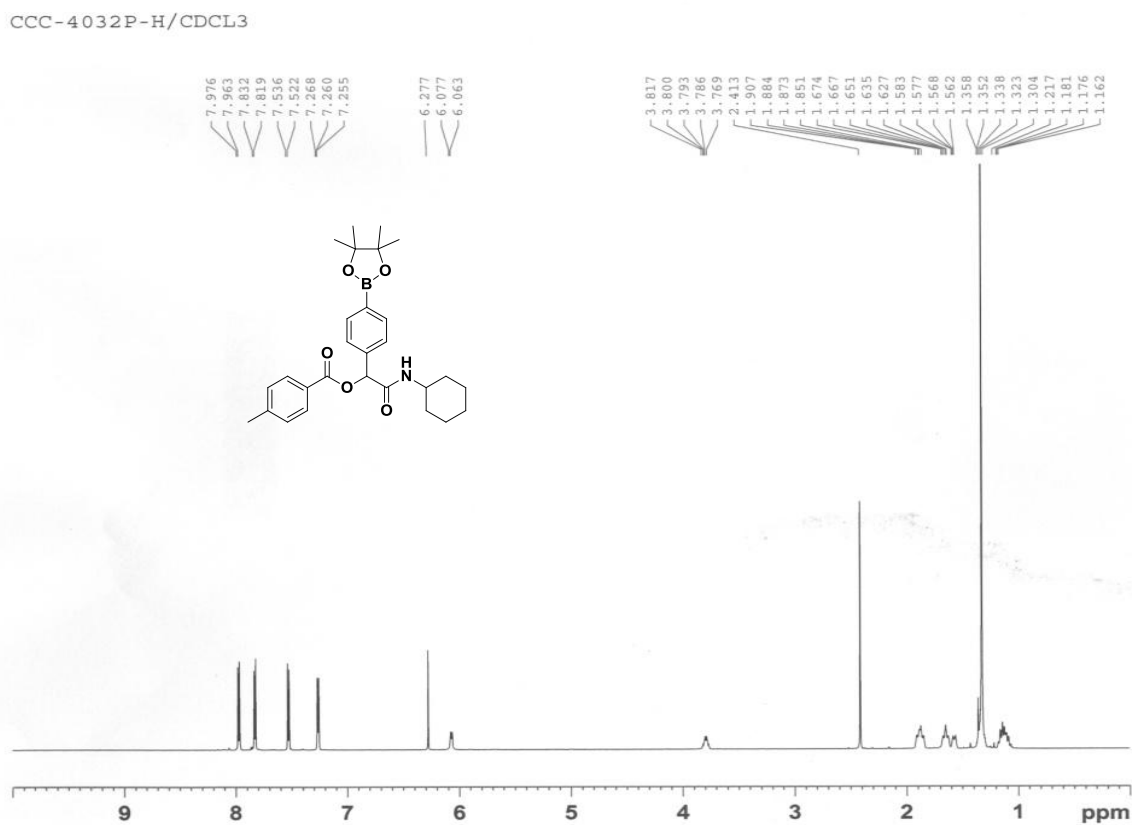

**Figure S101.** 600 MHz  $^{13}\text{C}$ -NMR of Compound (**B5**) in Chloroform-*d*.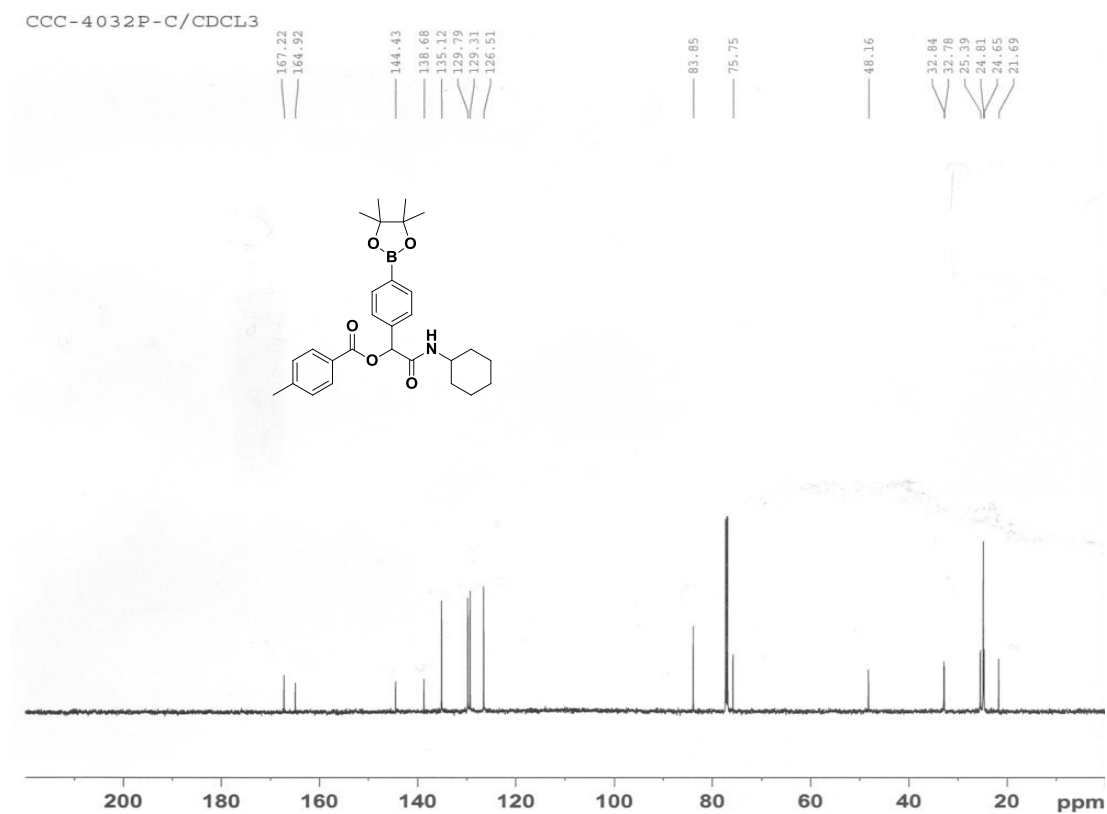**Figure S102.** 600 MHz  $^{11}\text{B}$ -NMR of Compound (**B5**) in Chloroform-*d*.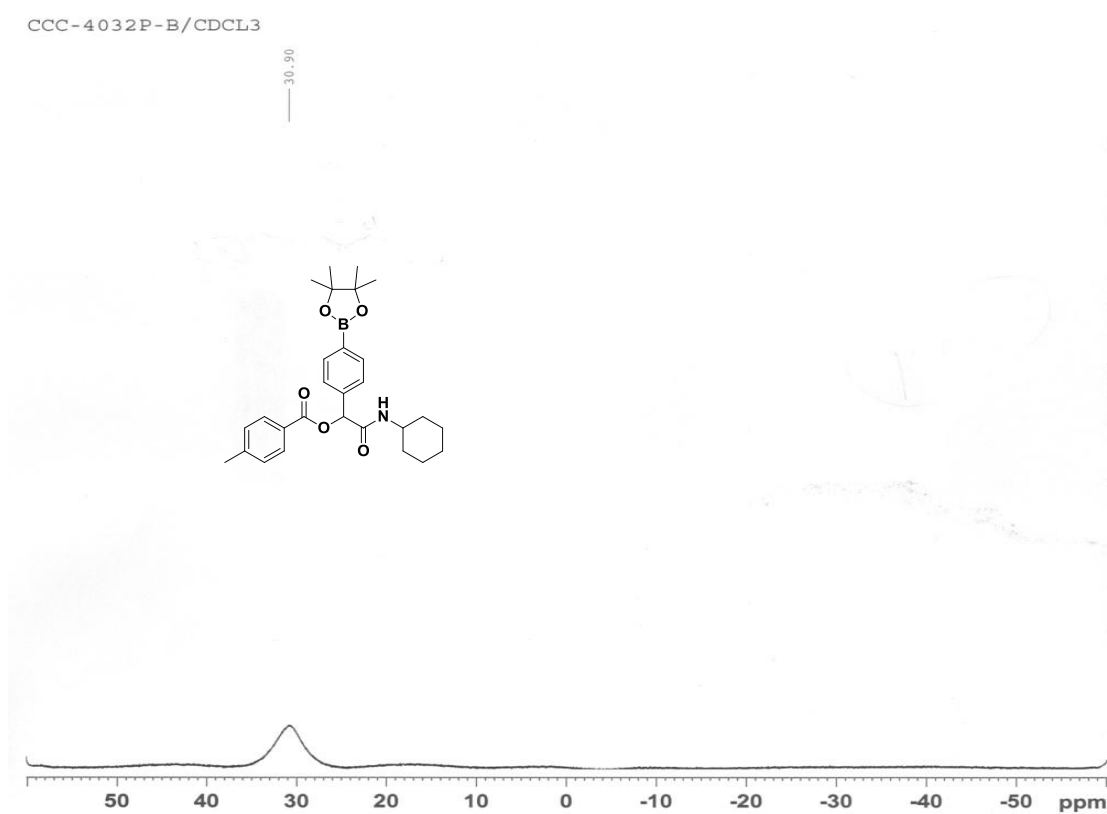

**Figure S103.** HRMS (ESI, positive ion)  $[M+H]^+$  of Compound (**B6**).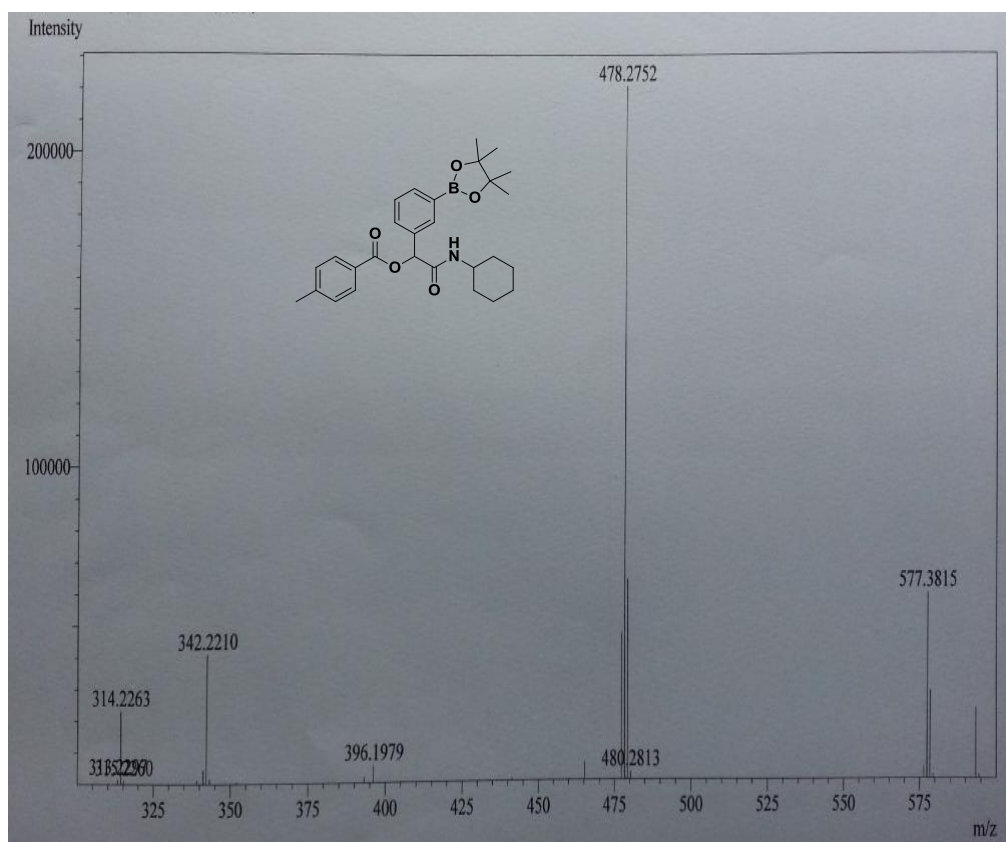**Figure S104.** 600 MHz  $^1\text{H}$ -NMR of Compound (**B6**) in Chloroform-*d*.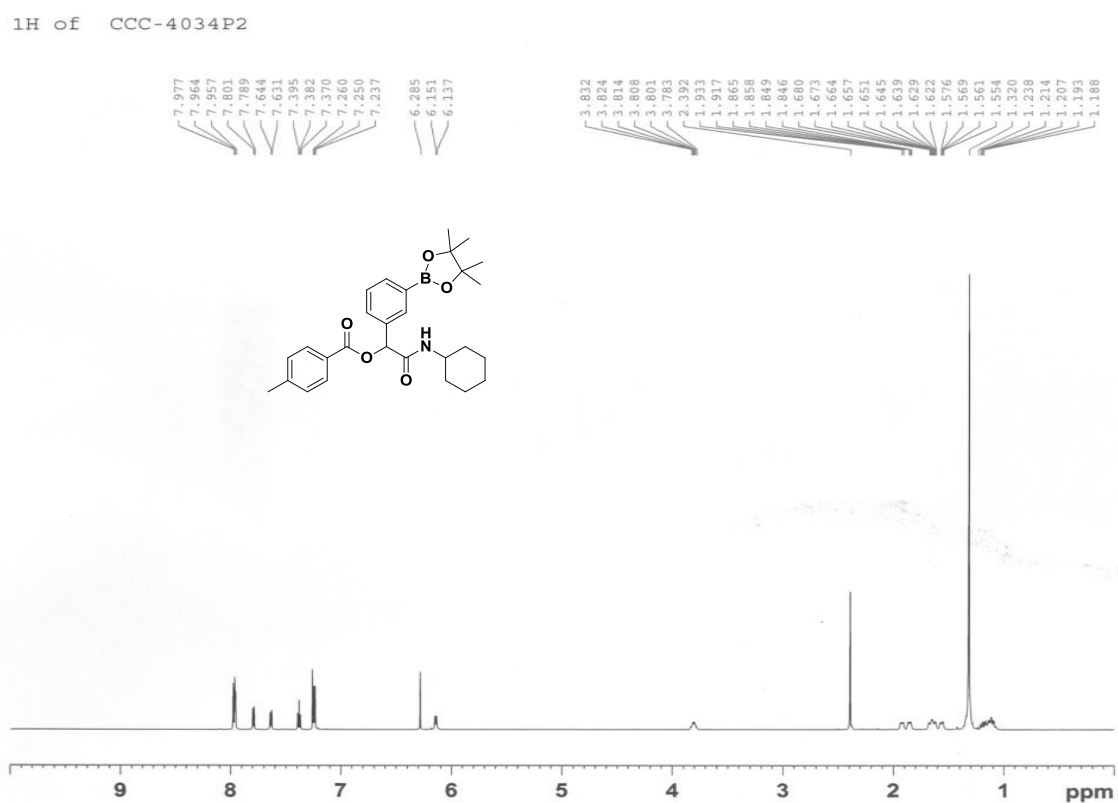

**Figure S105.** 600 MHz  $^{13}\text{C}$ -NMR of Compound (B6) in Chloroform-*d*.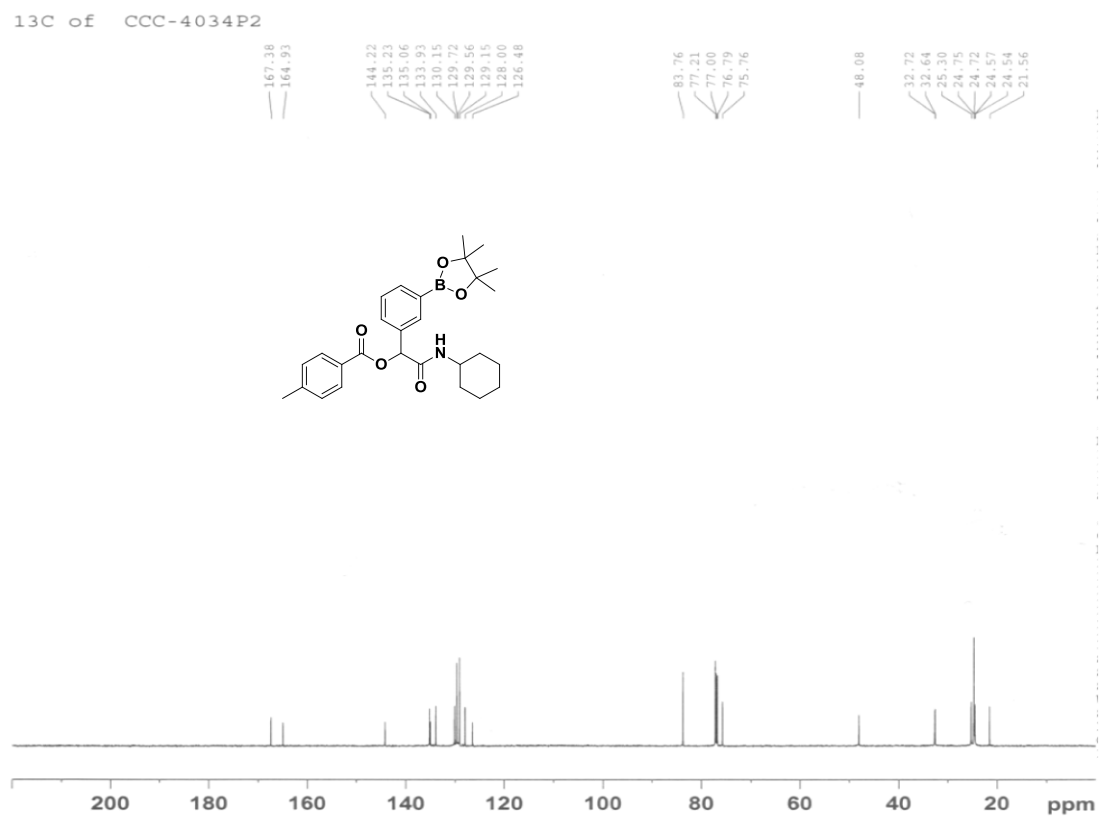**Figure S106.** 600 MHz  $^{11}\text{B}$ -NMR of Compound (B6) in Chloroform-*d*.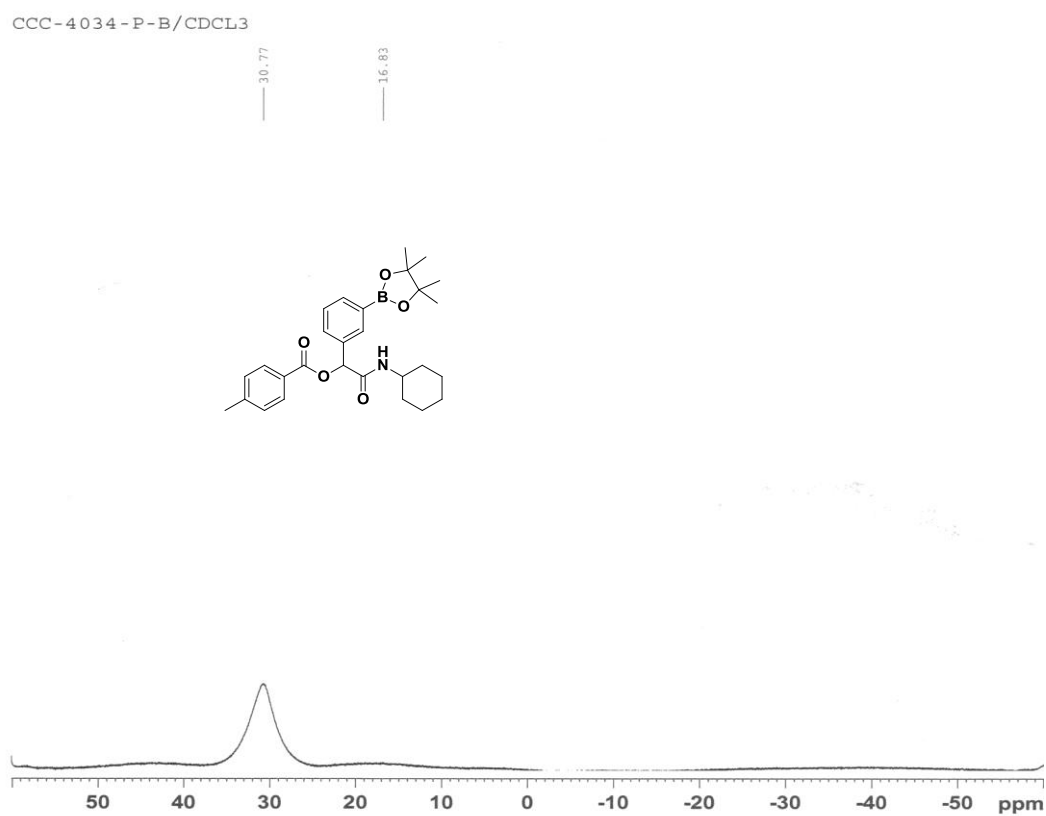

**Figure S107.** HRMS (ESI, positive ion)  $[M+H]^+$  of Compound (B7).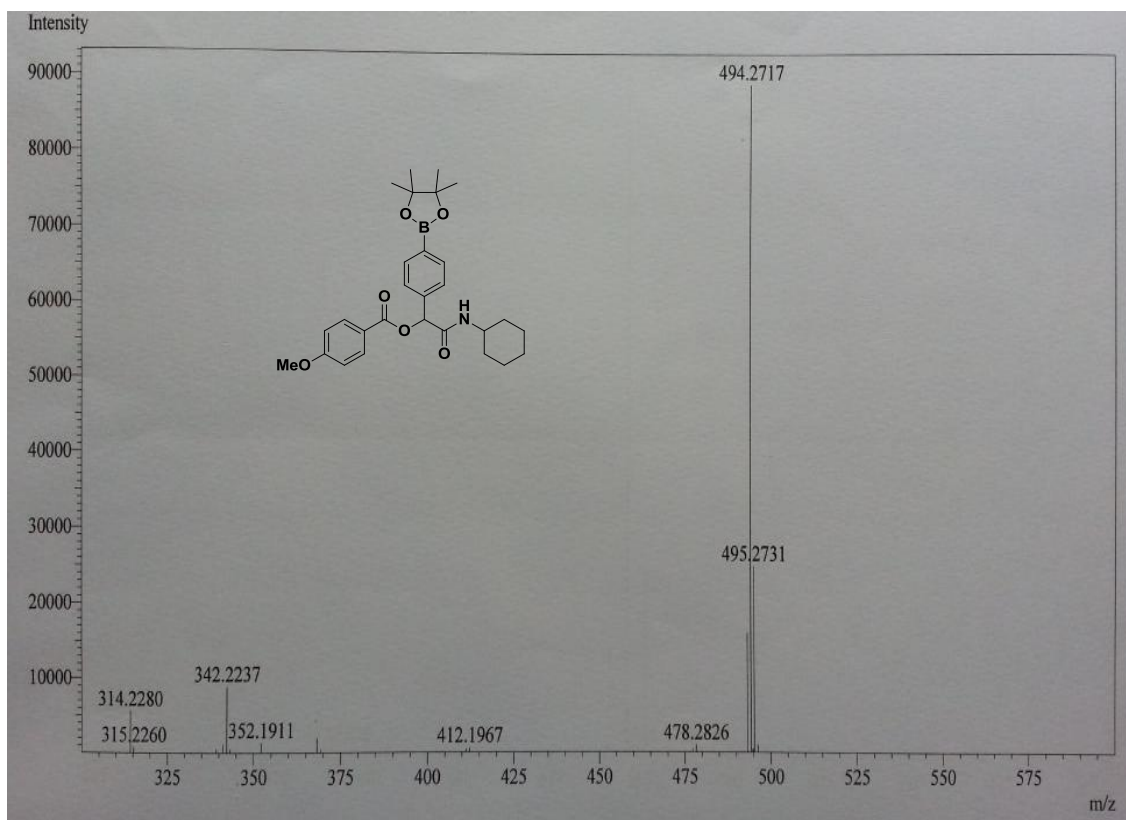**Figure S108.** 600 MHz  $^1\text{H}$ -NMR of Compound (B7) in Chloroform- $d$ .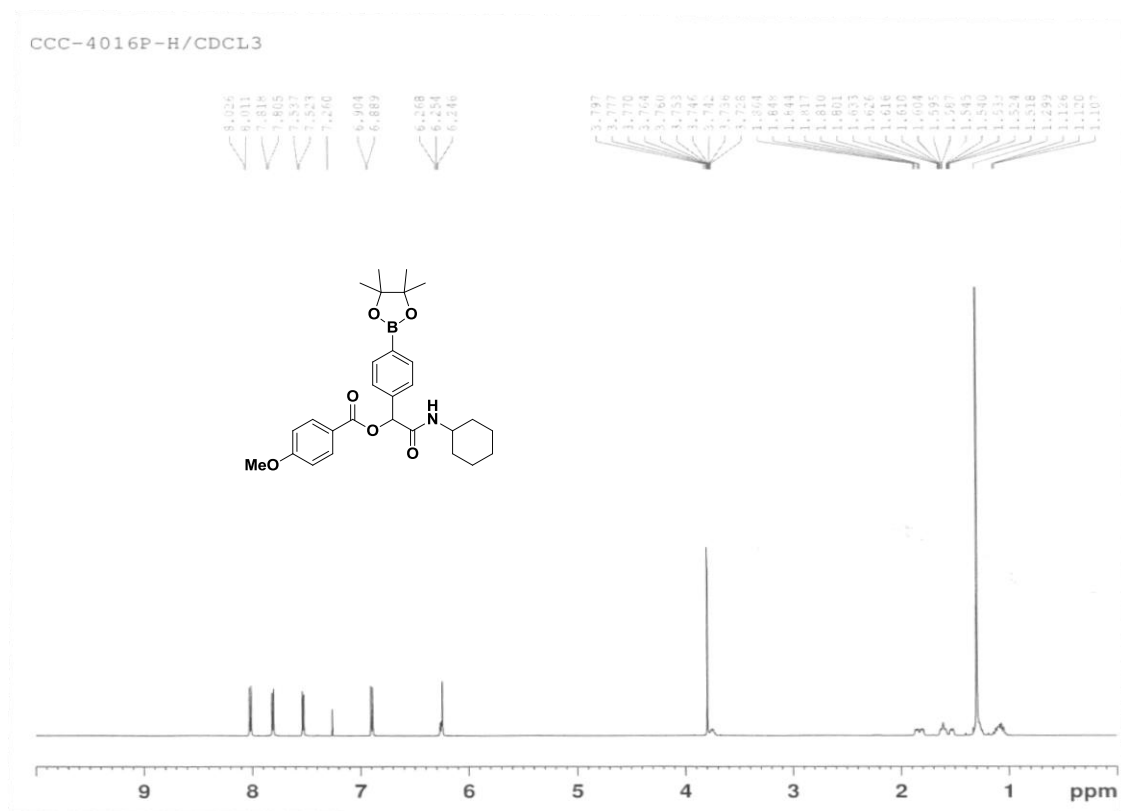

**Figure S109.** 600 MHz  $^{13}\text{C}$ -NMR of Compound (B7) in Chloroform-*d*.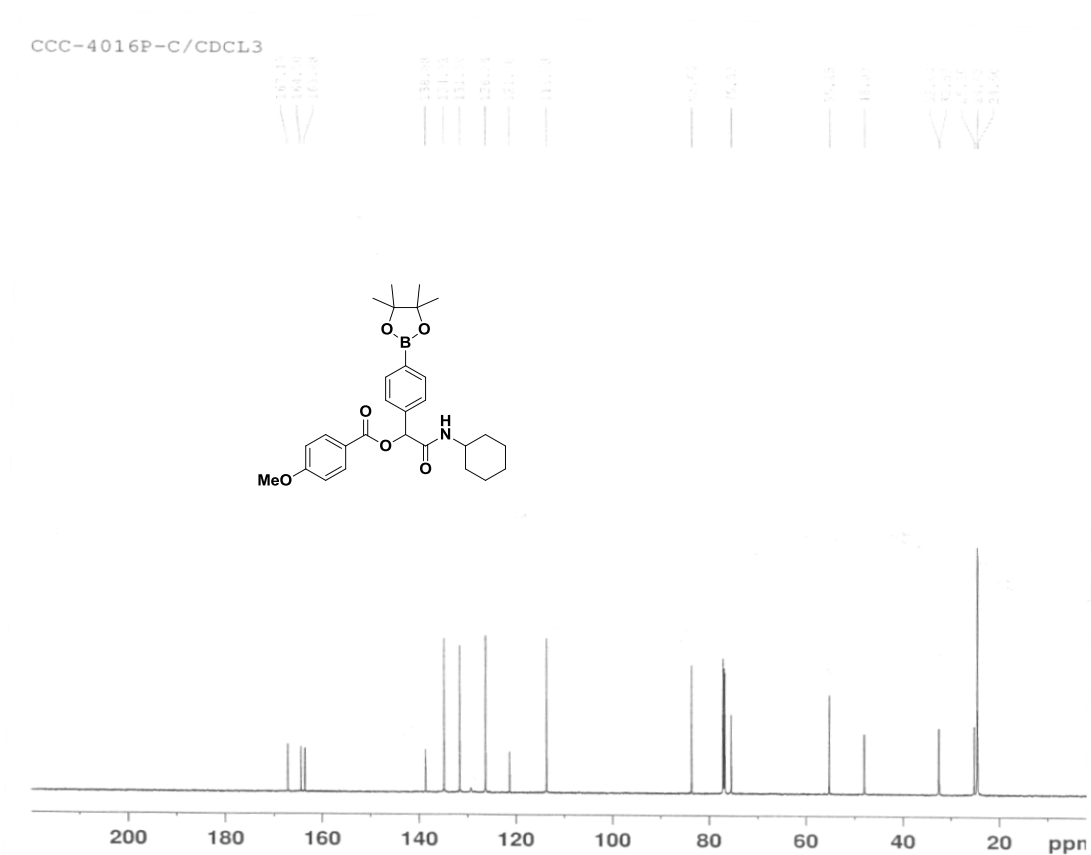**Figure S110.** 600 MHz  $^{11}\text{B}$ -NMR of Compound (B7) in Chloroform-*d*.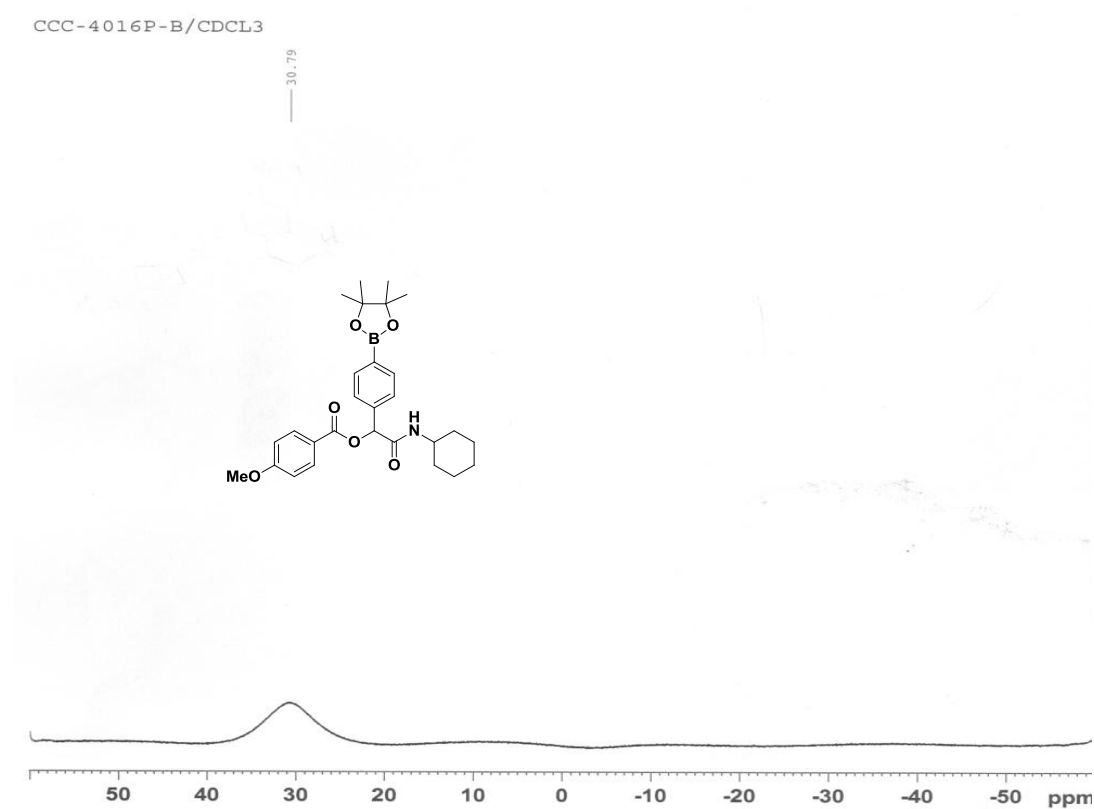

**Figure S111.** HRMS (ESI, positive ion)  $[M+H]^+$  of Compound (**B8**).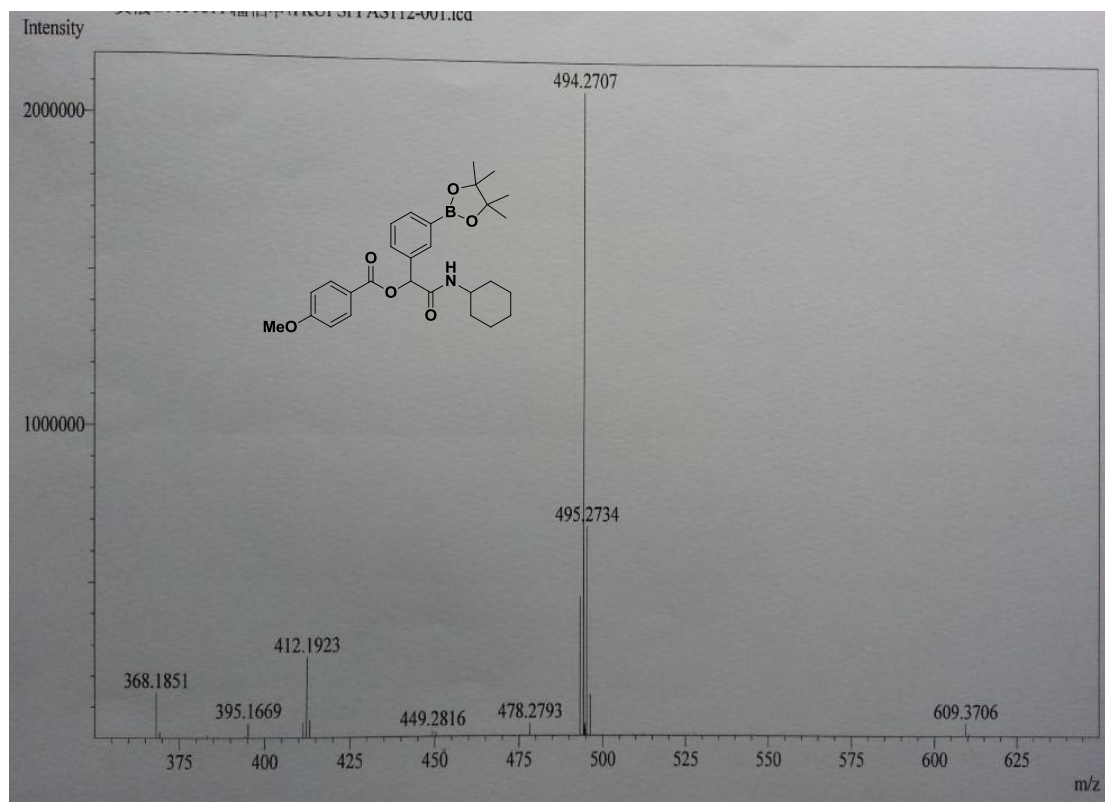**Figure S112.** 600 MHz  $^1\text{H}$ -NMR of Compound (**B8**) in Chloroform-*d*.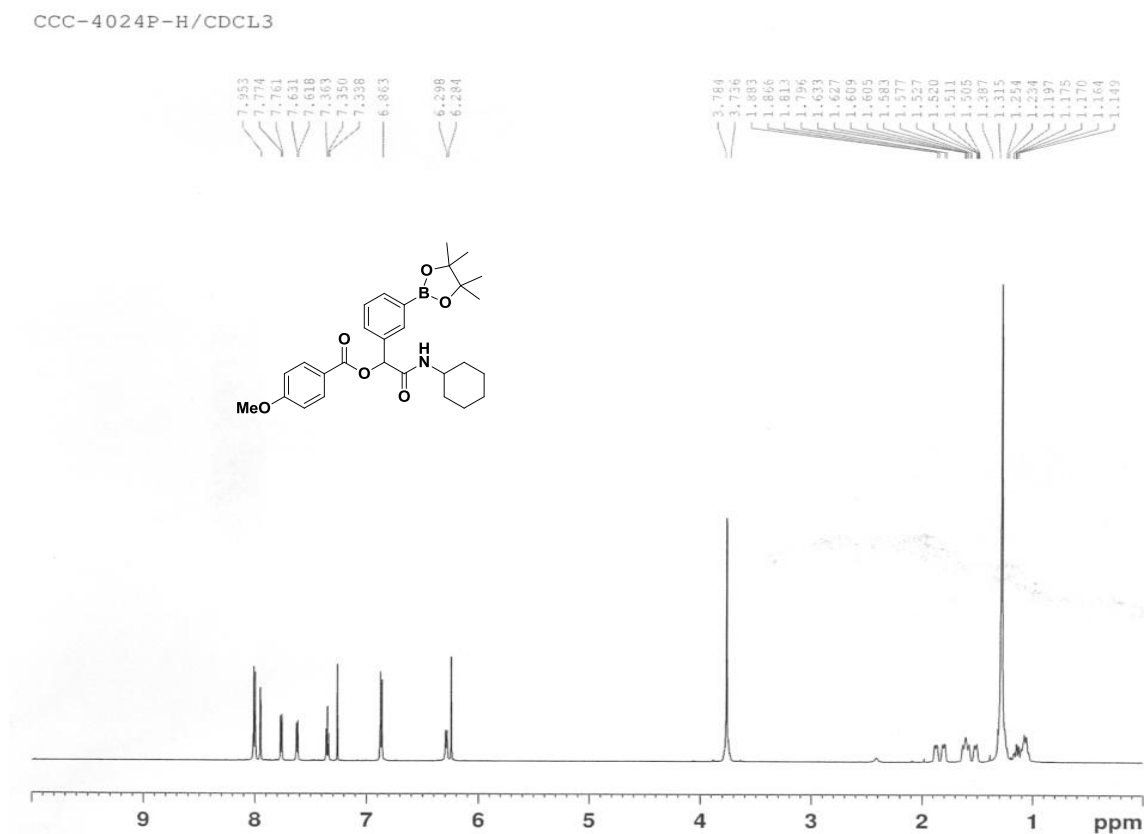



**Figure S113.** 600 MHz  $^{13}\text{C}$ -NMR of Compound (**B8**) in Chloroform-*d*.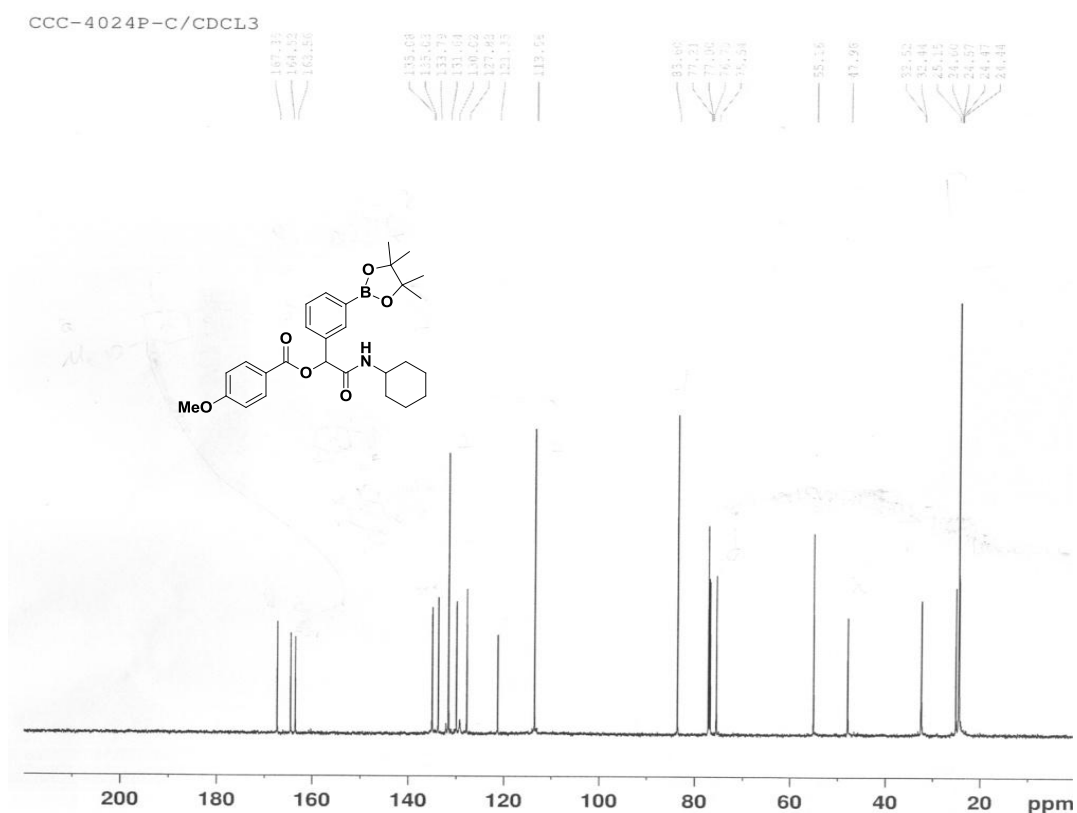**Figure S114.** 600 MHz  $^{11}\text{B}$ -NMR of Compound (**B8**) in Chloroform-*d*.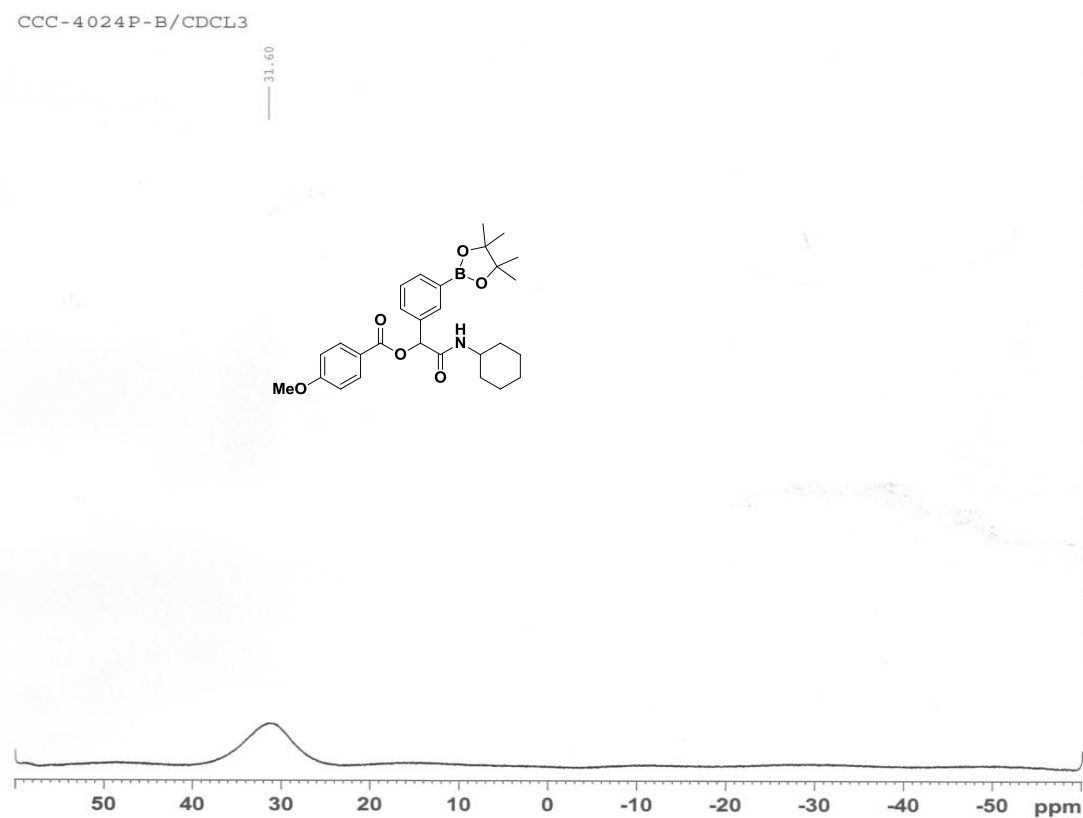

**Figure S115.** HRMS (ESI, positive ion)  $[M+H]^+$  of Compound (**B9**).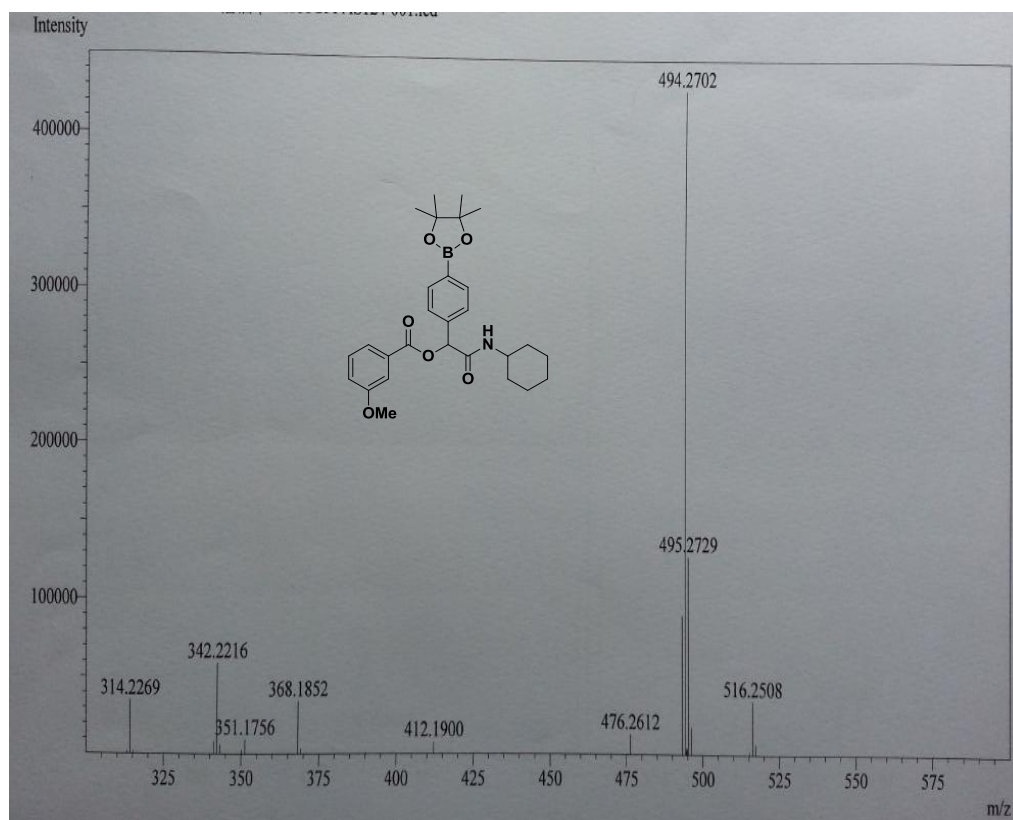**Figure S116.** 600 MHz  $^1\text{H}$ -NMR of Compound (**B9**) in Chloroform-*d*.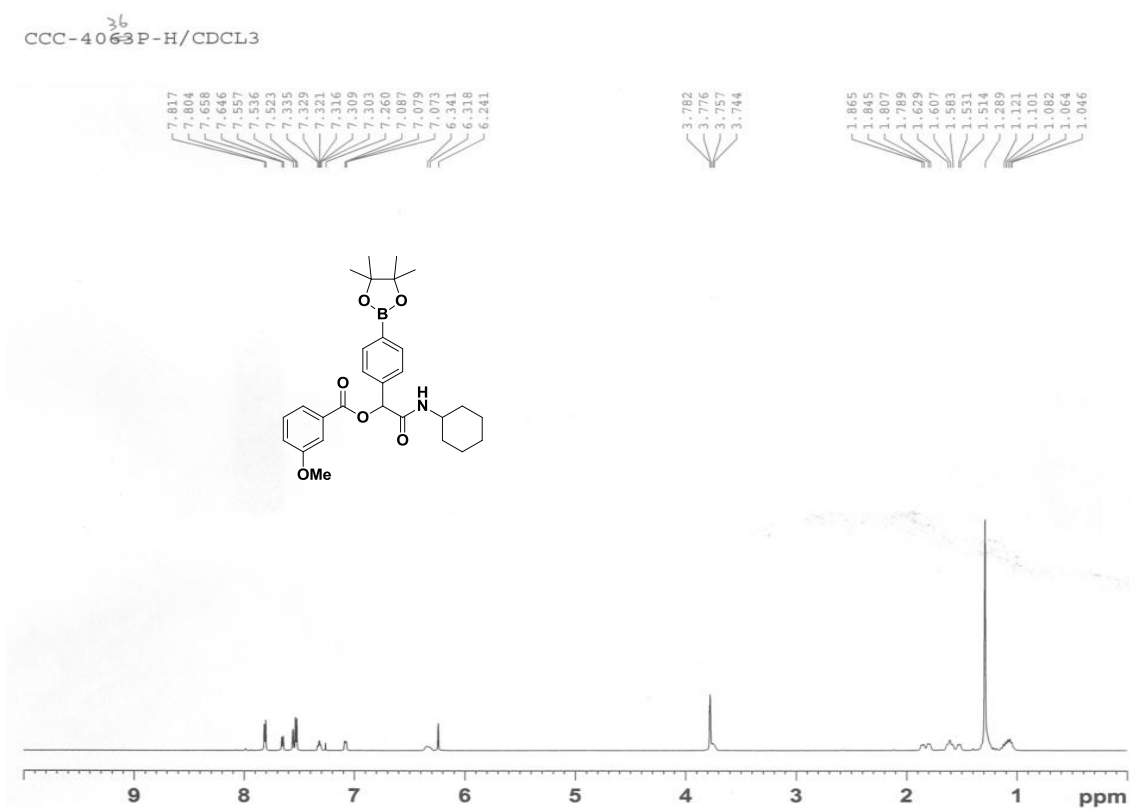

**Figure S117.** 600 MHz  $^{13}\text{C}$ -NMR of Compound (**B9**) in Chloroform-*d*.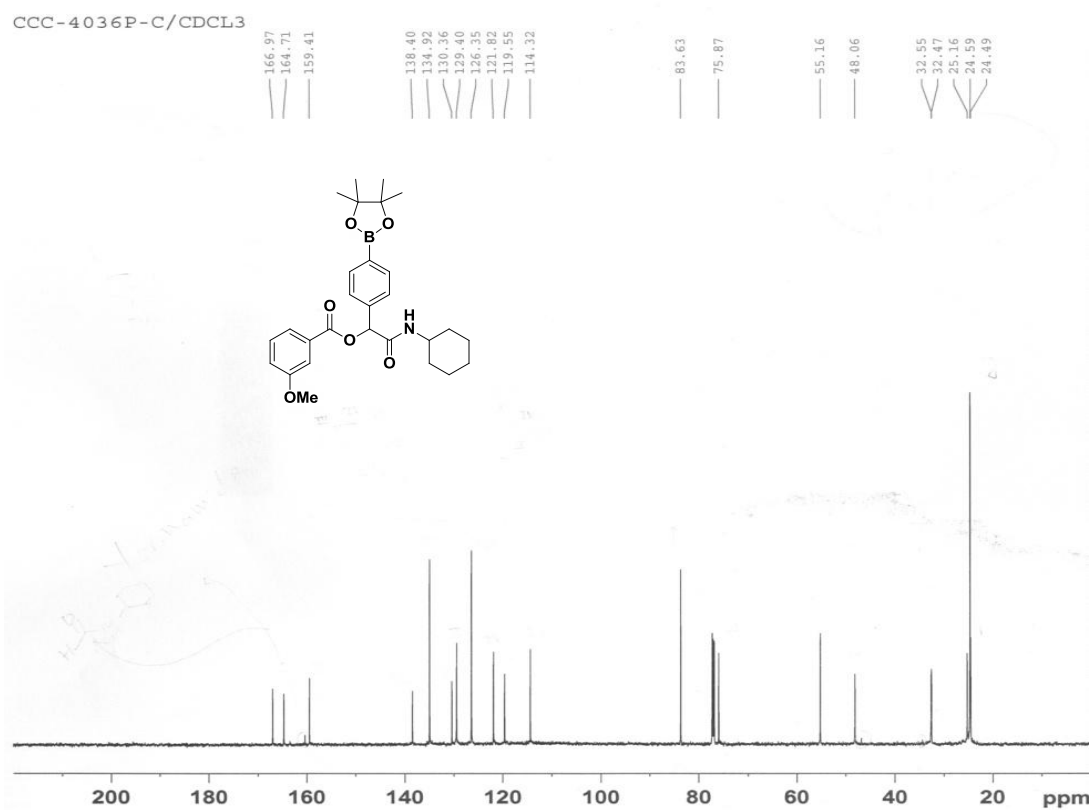**Figure S118.** 600 MHz  $^{11}\text{B}$ -NMR of Compound (**B9**) in Chloroform-*d*.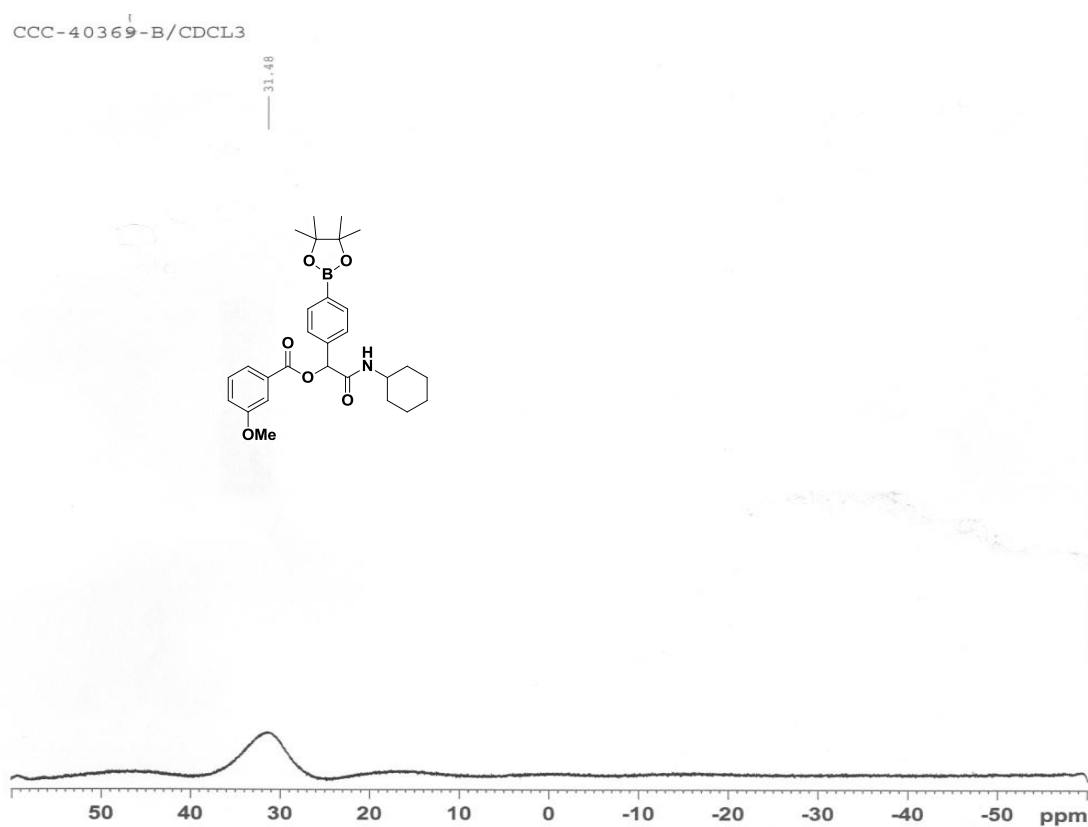

**Figure S119.** HRMS (ESI, positive ion)  $[M+H]^+$  of Compound (**B10**).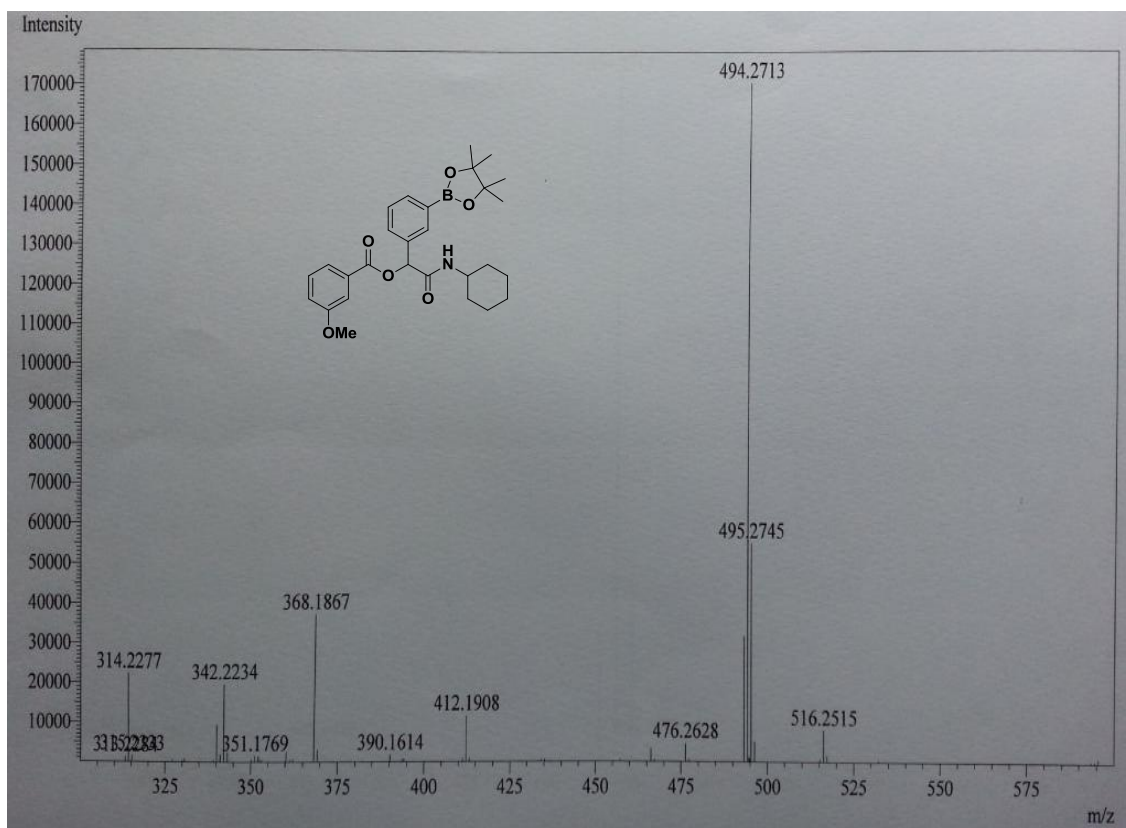**Figure S120.** 600 MHz  $^1\text{H}$ -NMR of Compound (**B10**) in Chloroform-*d*.CCCC-4038P3-H/CDCL<sub>3</sub>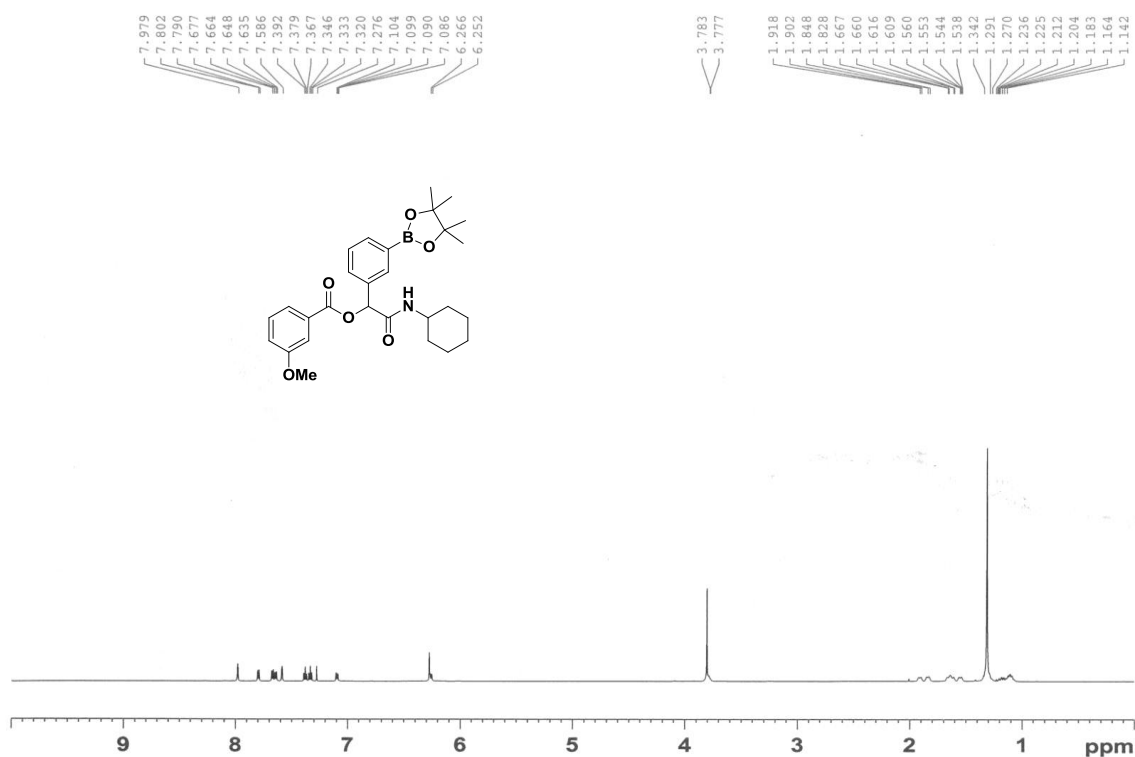

**Figure S121.** 600 MHz  $^{13}\text{C}$ -NMR of Compound (**B10**) in Chloroform-*d*.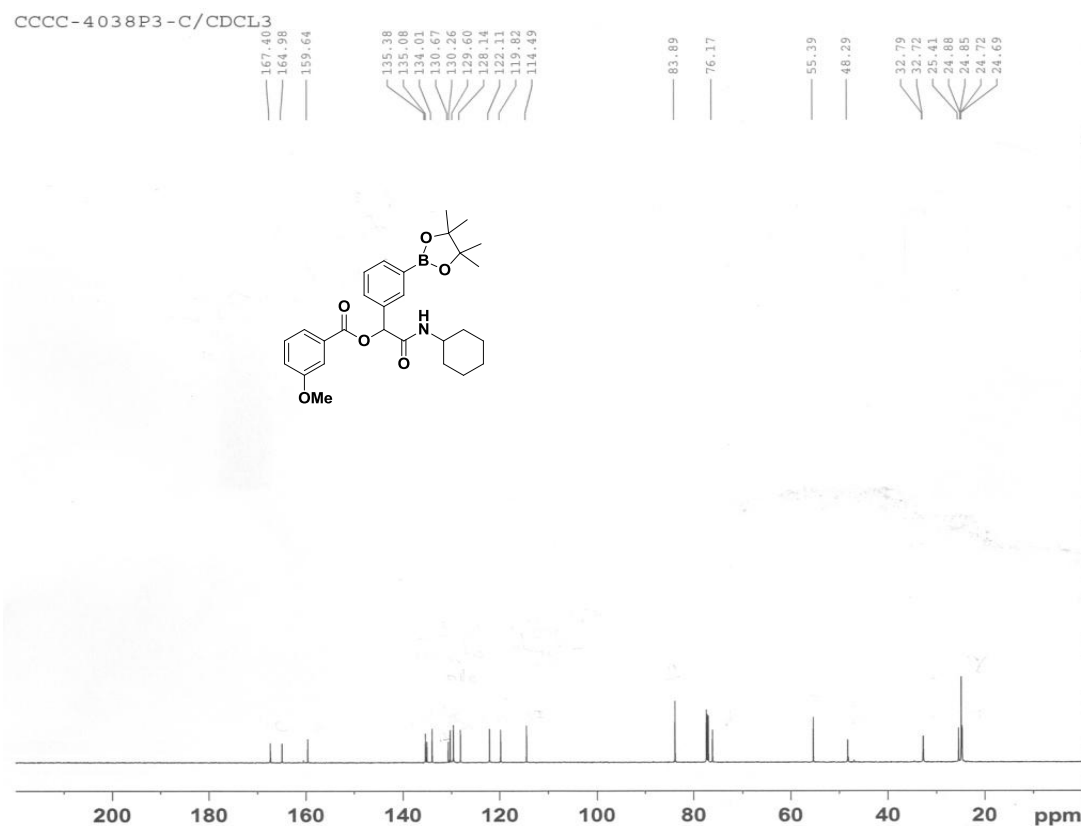**Figure S122.** 600 MHz  $^{11}\text{B}$ -NMR of Compound (**B10**) in Chloroform-*d*.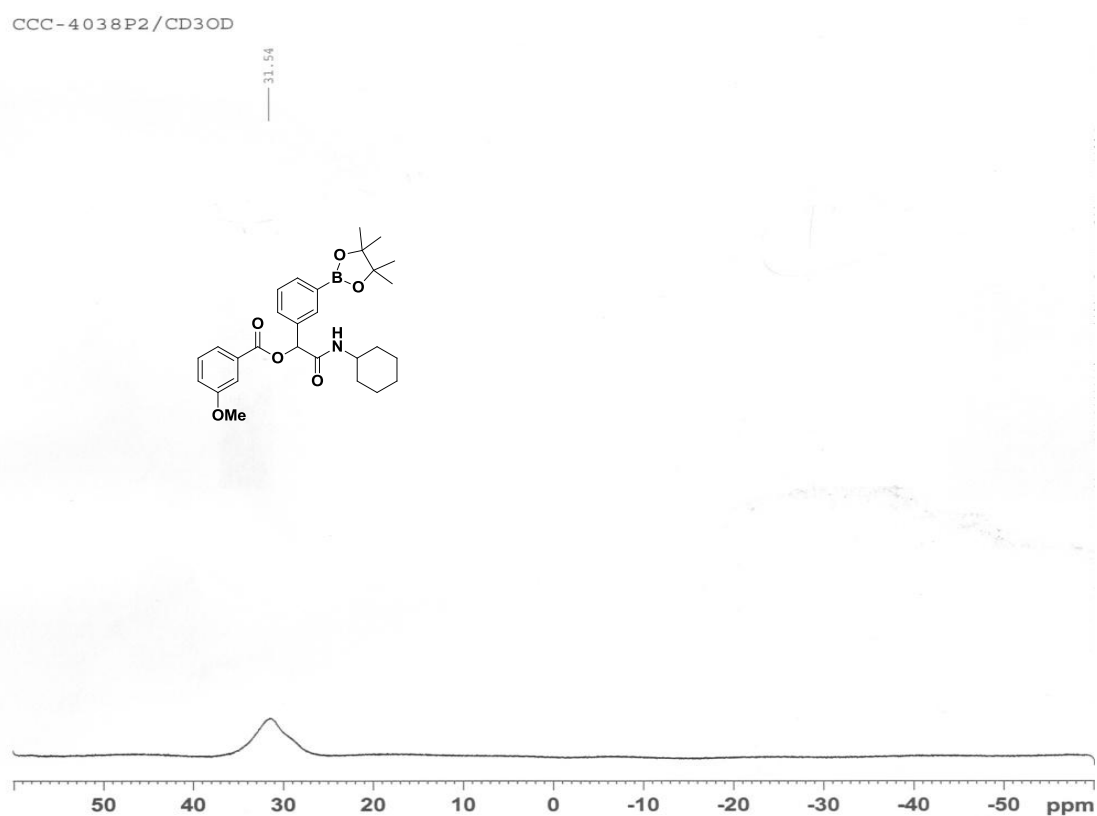

**Figure S123.** HRMS (ESI, positive ion)  $[M+H]^+$  of Compound (**B11**).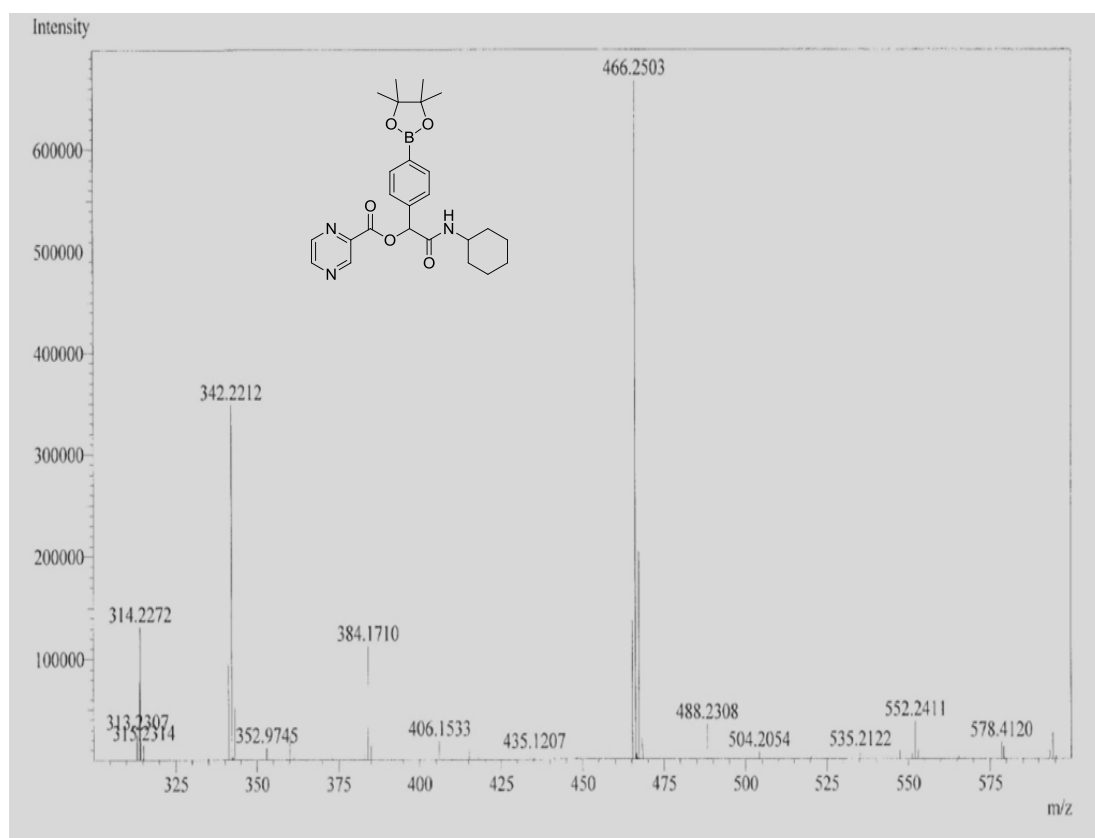**Figure S124.** 600 MHz  $^1\text{H}$ -NMR of Compound (**B11**) in Chloroform-*d*.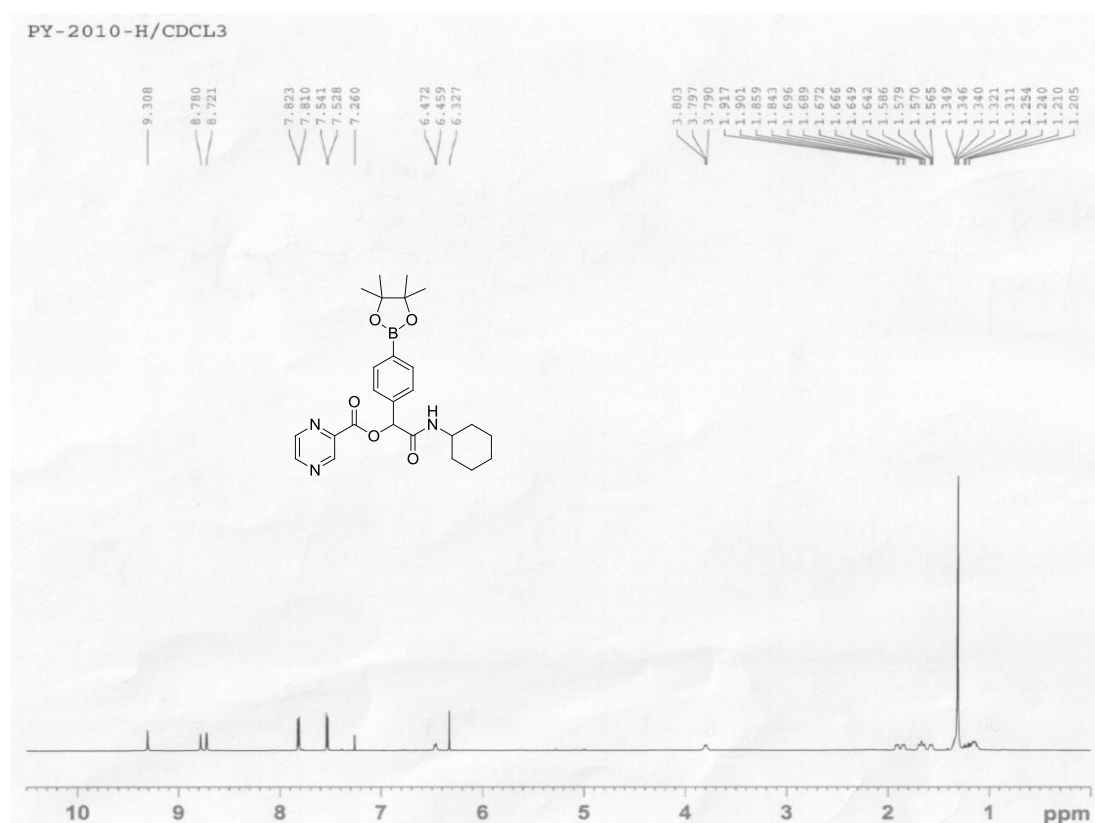

**Figure S125.** 600 MHz  $^{13}\text{C}$ -NMR of Compound (**B11**) in Chloroform-*d*.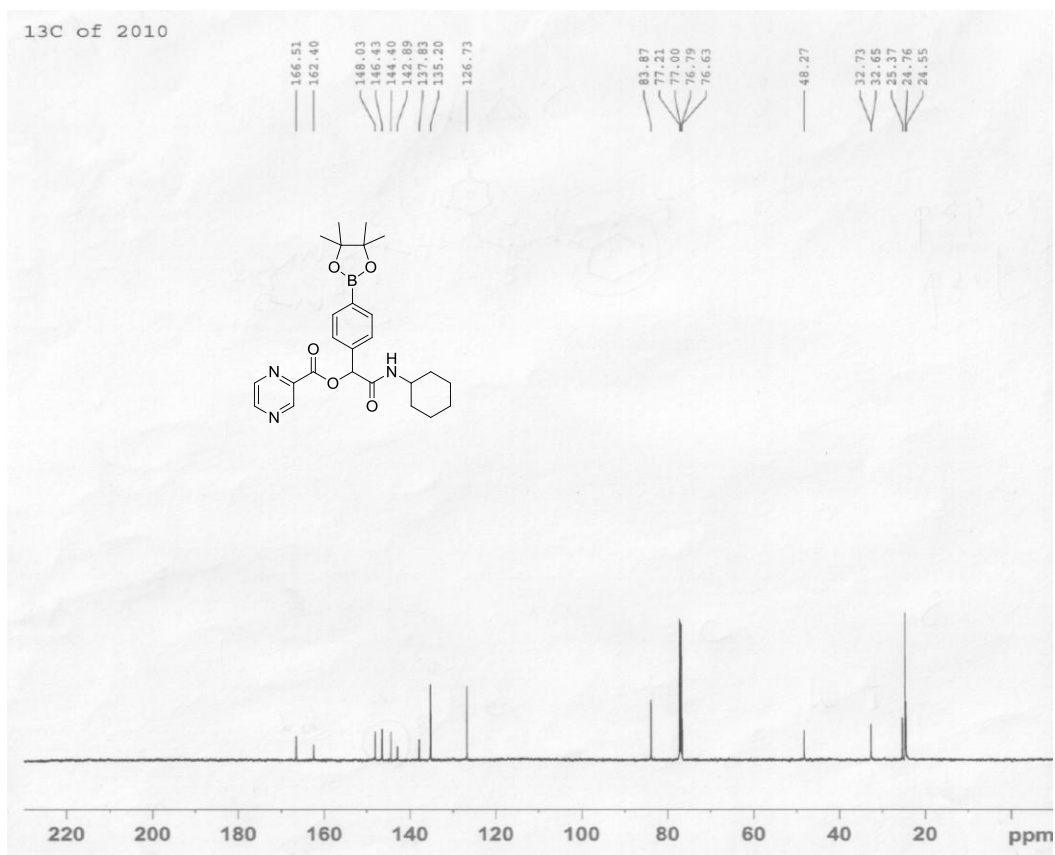**Figure S126.** 600 MHz  $^{11}\text{B}$ -NMR of Compound (**B11**) in Chloroform-*d*.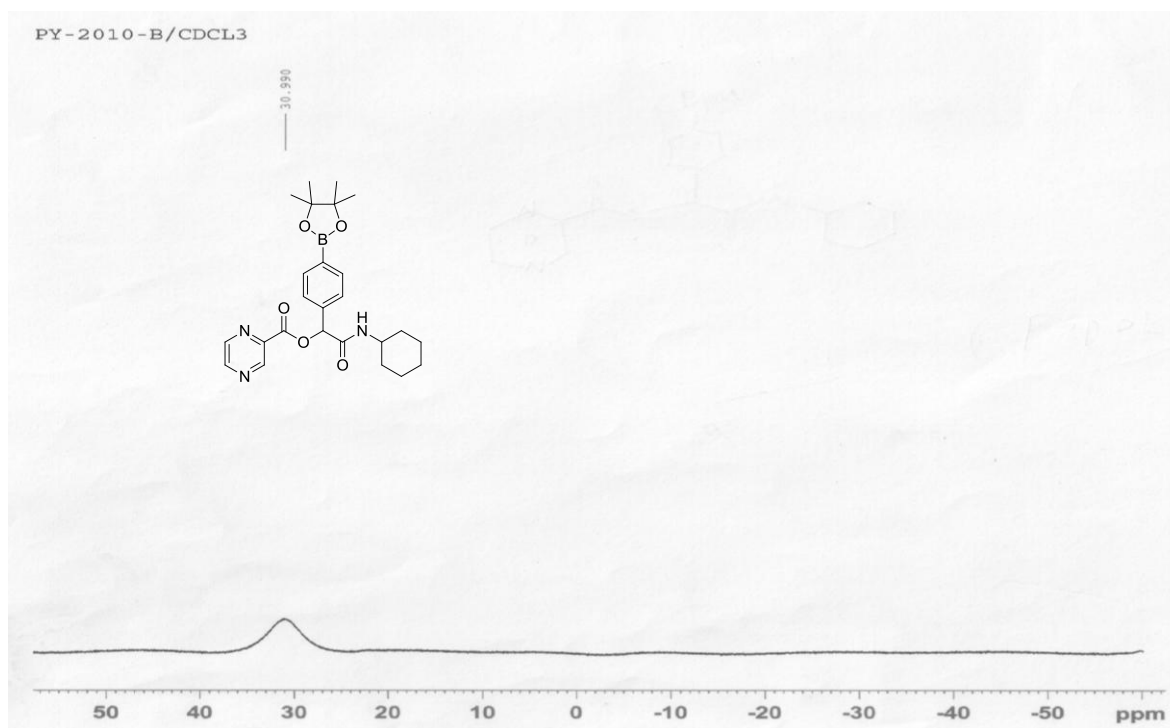

**Figure S127.** HRMS (ESI, positive ion)  $[M+H]^+$  of Compound (**B12**).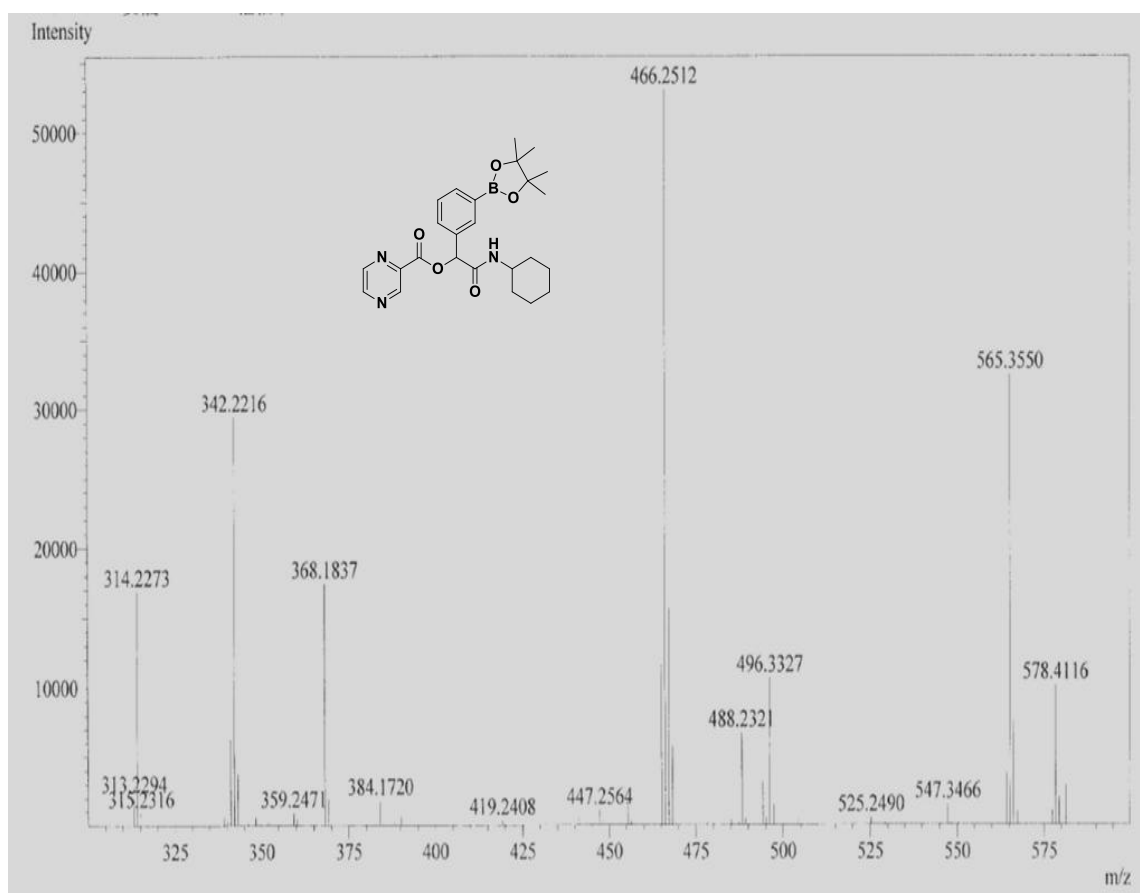**Figure S128.** 600 MHz  $^1\text{H}$ -NMR of Compound (**B12**) in Chloroform-*d*.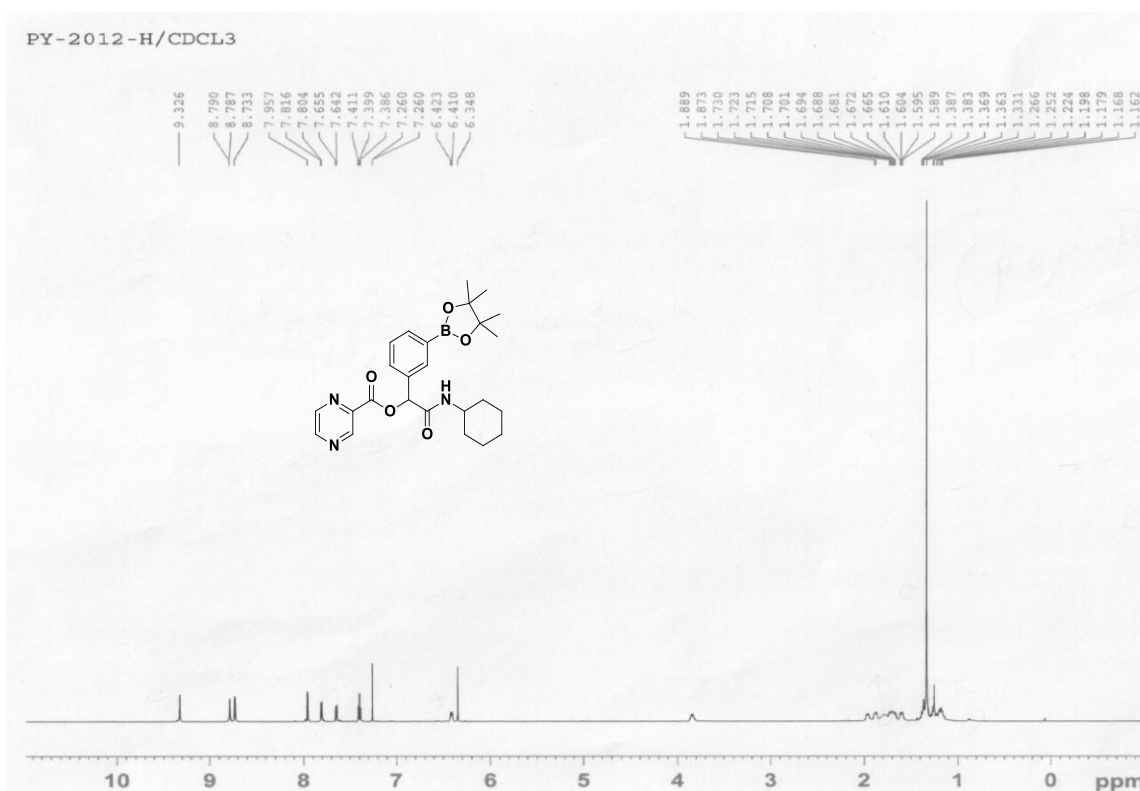



**Figure S129.** 600 MHz  $^{13}\text{C}$ -NMR of Compound (**B12**) in Chloroform-*d*.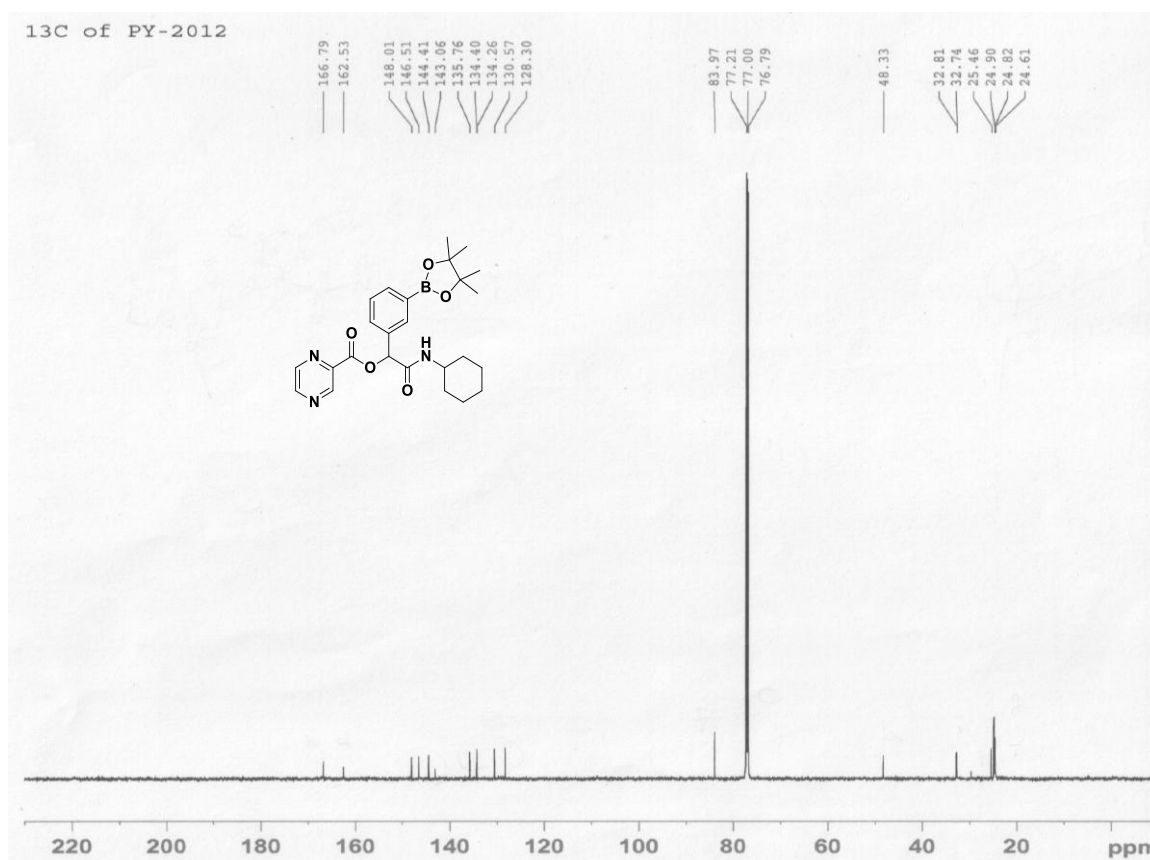**S130.** 600 MHz  $^{11}\text{B}$ -NMR of Compound (**B12**) in Chloroform-*d*.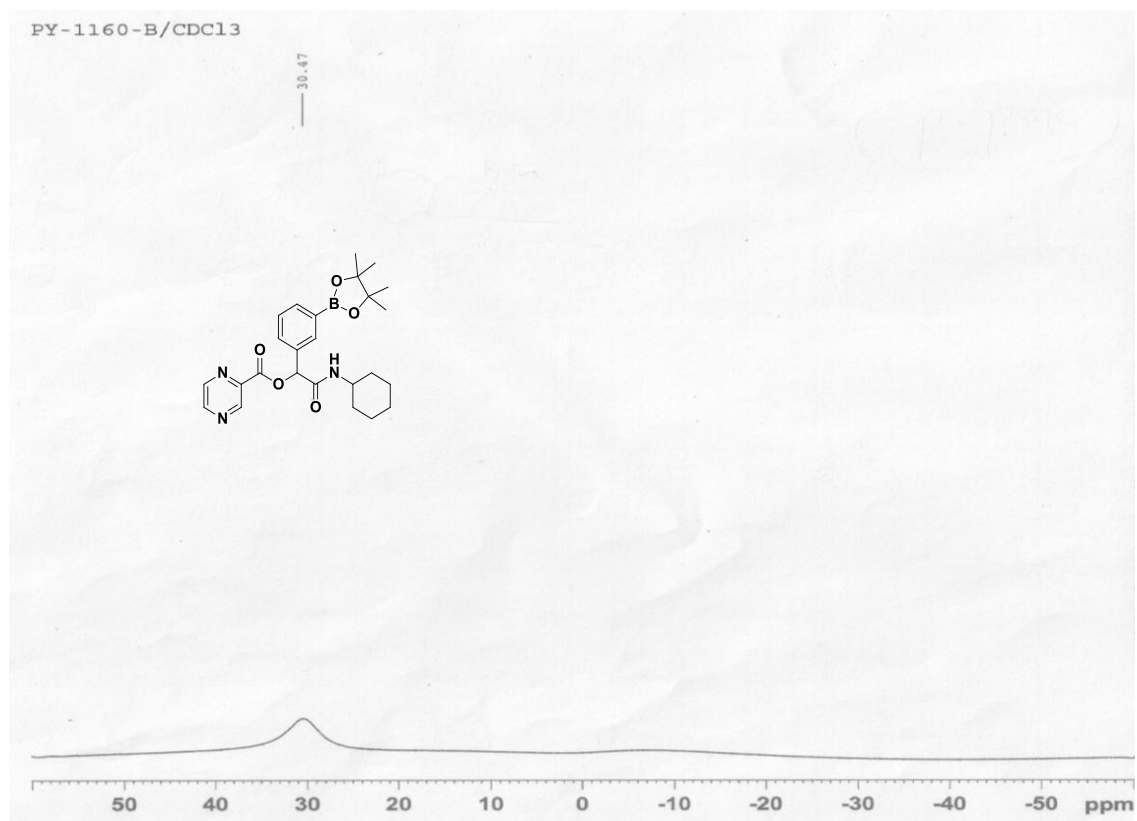

Supplement: s1 [file s1]
